# Supplementary material for: Novel Phenolic Constituents of Pulmonaria officinalis L. LC-MS/MS Comparison of Spring and Autumn Metabolite Profiles
Source: PubMed Central journal article supplement (PMC6225171; doi:10.3390/molecules23092277), 2018-09-06
Supplement: molecules-23-02277-s001.pdf [file molecules-23-02277-s001.pdf]

# Novel phenolic constituents of *Pulmonaria officinalis* L. LC-MS/MS comparison of spring and autumn metabolite profiles

Justyna Krzyżanowska-Kowalczyk<sup>1\*</sup>, Łukasz Pecio<sup>1</sup>, Jarosław Mołdoch<sup>1</sup>, Agnieszka Ludwiczuk<sup>2</sup>, Mariusz Kowalczyk<sup>1</sup>

<sup>1</sup>Department of Biochemistry and Crop Quality, Institute of Soil Science and Plant Cultivation - State Research Institute, Czartoryskich 8, 24-100 Puławy, Poland; jkrzyzanowska@iung.pulawy.pl (J.K.K.); lpecio@iung.pulawy.pl (Ł.P.); jmoldoch@iung.pulawy.pl (J.M.); mkowalczyk@iung.pulawy.pl (M.K.)

<sup>2</sup>Department of Pharmacognosy with Medicinal Plant Unit, Medical University of Lublin, Chodzki Str.1, 20-093 Lublin, Poland; aludwiczuk@pharmacognosy.org (A.L.)

\*Correspondence: jkrzyzanowska@iung.pulawy.pl; Tel.: +48-81-4786-881

## Spis treści

|                    |                                                                                                                                                                                                   |    |
|--------------------|---------------------------------------------------------------------------------------------------------------------------------------------------------------------------------------------------|----|
| <b>Figure 1S.</b>  | $^1\text{H}$ (500 MHz) and $^{13}\text{C}$ (125 MHz) NMR data of compound 1 in $\text{CD}_3\text{OD}$ , 25°C; on-line PDA UV spectrum in MeCN/ $\text{H}_2\text{O}$ .....                         | 6  |
| <b>Figure 2S.</b>  | $^1\text{H}$ (500 MHz) and $^{13}\text{C}$ (125 MHz) NMR data of compound 2 in $\text{CD}_3\text{OD}$ , 25°C; on-line PDA UV spectrum in MeCN/ $\text{H}_2\text{O}$ .....                         | 6  |
| <b>Figure 3S.</b>  | $^1\text{H}$ (500 MHz) and $^{13}\text{C}$ (125 MHz) NMR data of compound 3 in $\text{CD}_3\text{OD}$ , 25°C; on-line PDA UV spectrum in MeCN/ $\text{H}_2\text{O}$ , ECD spectrum in MeOH .....  | 7  |
| <b>Figure 4S.</b>  | $^1\text{H}$ NMR spectrum of compound 3 .....                                                                                                                                                     | 7  |
| <b>Figure 5S.</b>  | $^{13}\text{C}$ UDEFT NMR spectrum of compound 3 .....                                                                                                                                            | 8  |
| <b>Figure 6S.</b>  | $^1\text{H}$ - $^1\text{H}$ COSY NMR spectrum of compound 3 .....                                                                                                                                 | 8  |
| <b>Figure 7S.</b>  | $^1\text{H}$ - $^1\text{H}$ TROESY (250 ms) NMR spectrum of compound 3 .....                                                                                                                      | 9  |
| <b>Figure 8S.</b>  | $^1\text{H}$ - $^{13}\text{C}$ HSQC NMR spectrum of compound 3 .....                                                                                                                              | 9  |
| <b>Figure 9S.</b>  | $^1\text{H}$ - $^{13}\text{C}$ H2BC NMR spectrum of compound 3 .....                                                                                                                              | 10 |
| <b>Figure 10S.</b> | $^1\text{H}$ - $^{13}\text{C}$ HMBC (8 Hz) NMR spectrum of compound 3 .....                                                                                                                       | 10 |
| <b>Figure 11S.</b> | $^1\text{H}$ (500 MHz) and $^{13}\text{C}$ (125 MHz) NMR data of compound 4 in $\text{CD}_3\text{OD}$ , 25°C; on-line PDA UV spectrum in MeCN/ $\text{H}_2\text{O}$ , ECD spectrum in MeOH .....  | 11 |
| <b>Figure 12S.</b> | $^1\text{H}$ (500 MHz) $^{13}\text{C}$ (125 MHz) and $^{15}\text{N}$ (50 MHz) NMR data of compound 5 in $\text{CD}_3\text{OD}$ , 25°C.....                                                        | 11 |
| <b>Figure 13S.</b> | $^1\text{H}$ (500 MHz) and $^{13}\text{C}$ (125 MHz) NMR data of compound 7 in $\text{CD}_3\text{OD}$ , 25°C.....                                                                                 | 12 |
| <b>Figure 14S.</b> | $^1\text{H}$ (500 MHz) and $^{13}\text{C}$ (125 MHz) NMR data of compound 10 in $\text{CD}_3\text{OD}$ , 25°C; on-line PDA UV spectrum in MeCN/ $\text{H}_2\text{O}$ .....                        | 12 |
| <b>Figure 15S.</b> | $^1\text{H}$ NMR spectrum of compound 10.....                                                                                                                                                     | 13 |
| <b>Figure 16S.</b> | $^{13}\text{C}$ DEPTQ NMR spectrum of compound 10.....                                                                                                                                            | 13 |
| <b>Figure 17S.</b> | $^1\text{H}$ - $^1\text{H}$ COSY NMR spectrum of compound 10 .....                                                                                                                                | 14 |
| <b>Figure 18S.</b> | $^1\text{H}$ - $^1\text{H}$ TROESY (250 ms) NMR spectrum of compound 10 .....                                                                                                                     | 14 |
| <b>Figure 19S.</b> | $^1\text{H}$ - $^{13}\text{C}$ HSQC NMR spectrum of compound 10.....                                                                                                                              | 15 |
| <b>Figure 20S.</b> | $^1\text{H}$ - $^{13}\text{C}$ H2BC NMR spectrum of compound 10 .....                                                                                                                             | 15 |
| <b>Figure 21S.</b> | $^1\text{H}$ - $^{13}\text{C}$ HMBC (8 Hz) NMR spectrum of compound 10 .....                                                                                                                      | 16 |
| <b>Figure 22S.</b> | $^1\text{H}$ (500 MHz) and $^{13}\text{C}$ (125 MHz) NMR data of compound 11 in $\text{CD}_3\text{OD}$ , 25°C; on-line PDA UV spectrum in MeCN/ $\text{H}_2\text{O}$ ; ECD spectrum in MeOH ..... | 16 |
| <b>Figure 23S.</b> | $^1\text{H}$ (500 MHz) and $^{13}\text{C}$ (125 MHz) NMR data of compound 12 in $\text{CD}_3\text{OD}$ , 25°C; on-line PDA UV spectrum in MeCN/ $\text{H}_2\text{O}$ ; ECD spectrum in MeOH ..... | 17 |
| <b>Figure 24S.</b> | $^1\text{H}$ (500 MHz) and $^{13}\text{C}$ (125 MHz) NMR data of compound 14 in $\text{CD}_3\text{OD}$ , 25°C; on-line PDA UV spectrum in MeCN/ $\text{H}_2\text{O}$ ; ECD spectrum in MeOH ..... | 17 |
| <b>Figure 25S.</b> | $^1\text{H}$ NMR spectrum of compound 14.....                                                                                                                                                     | 18 |
| <b>Figure 26S.</b> | $^{13}\text{C}$ DEPTQ NMR spectrum of compound 14.....                                                                                                                                            | 18 |
| <b>Figure 27S.</b> | $^1\text{H}$ - $^1\text{H}$ COSY NMR spectrum of compound 14 .....                                                                                                                                | 19 |
| <b>Figure 28S.</b> | $^1\text{H}$ - $^1\text{H}$ NOESY (400 ms) NMR spectrum of compound 14.....                                                                                                                       | 19 |
| <b>Figure 29S.</b> | $^1\text{H}$ - $^{13}\text{C}$ HSQC NMR spectrum of compound 14.....                                                                                                                              | 20 |
| <b>Figure 30S.</b> | $^1\text{H}$ - $^{13}\text{C}$ H2BC NMR spectrum of compound 14 .....                                                                                                                             | 20 |
| <b>Figure 31S.</b> | $^1\text{H}$ - $^{13}\text{C}$ HMBC (8 Hz) NMR spectrum of compound 14 .....                                                                                                                      | 21 |
| <b>Figure 32S.</b> | $^1\text{H}$ (500 MHz) and $^{13}\text{C}$ (125 MHz) NMR data of compound 15 in $\text{CD}_3\text{OD}$ , 25°C; on-line PDA UV spectrum in MeCN/ $\text{H}_2\text{O}$ .....                        | 21 |

|                    |                                                                                                                                                                                                                  |    |
|--------------------|------------------------------------------------------------------------------------------------------------------------------------------------------------------------------------------------------------------|----|
| <b>Figure 33S.</b> | $^1\text{H}$ (500 MHz) and $^{13}\text{C}$ (125 MHz) NMR data of compound 18 in $\text{CD}_3\text{OD}$ , 25°C; on-line PDA UV spectrum in $\text{MeCN}/\text{H}_2\text{O}$ ; ECD spectrum in $\text{MeOH}$ ..... | 22 |
| <b>Figure 34S.</b> | $^1\text{H}$ NMR spectrum of compound 18.....                                                                                                                                                                    | 22 |
| <b>Figure 35S.</b> | $^{13}\text{C}$ DEPTQ NMR spectrum of compound 18.....                                                                                                                                                           | 23 |
| <b>Figure 36S.</b> | $^1\text{H}$ - $^1\text{H}$ COSY NMR spectrum of compound 18 .....                                                                                                                                               | 23 |
| <b>Figure 37S.</b> | $^1\text{H}$ - $^1\text{H}$ TROESY (250 ms) NMR spectrum of compound 18 .....                                                                                                                                    | 24 |
| <b>Figure 38S.</b> | $^1\text{H}$ - $^{13}\text{C}$ HSQC NMR spectrum of compound 18.....                                                                                                                                             | 24 |
| <b>Figure 39S.</b> | $^1\text{H}$ - $^{13}\text{C}$ 1,1-ADEQUATE NMR spectrum of compound 18.....                                                                                                                                     | 25 |
| <b>Figure 40S.</b> | $^1\text{H}$ - $^{13}\text{C}$ HMBC (8 Hz) NMR spectrum of compound 18 .....                                                                                                                                     | 25 |
| <b>Figure 41S.</b> | $^1\text{H}$ (500 MHz) and $^{13}\text{C}$ (125 MHz) NMR data of compound 19 in $\text{CD}_3\text{OD}$ , 25°C; on-line PDA UV spectrum in $\text{MeCN}/\text{H}_2\text{O}$ .....                                 | 26 |
| <b>Figure 42S.</b> | $^1\text{H}$ (500 MHz) and $^{13}\text{C}$ (125 MHz) NMR data of compound 21 in $\text{CD}_3\text{OD}$ , 25°C; on-line PDA UV spectrum in $\text{MeCN}/\text{H}_2\text{O}$ .....                                 | 26 |
| <b>Figure 43S.</b> | $^1\text{H}$ (500 MHz) and $^{13}\text{C}$ (125 MHz) NMR data of compound 22 in $\text{CD}_3\text{OD}$ , 25°C; on-line PDA UV spectrum in $\text{MeCN}/\text{H}_2\text{O}$ .....                                 | 27 |
| <b>Figure 44S.</b> | $^1\text{H}$ (500 MHz) and $^{13}\text{C}$ (125 MHz) NMR data of compound 23 in $\text{CD}_3\text{OD}$ , 25°C; on-line PDA UV spectrum in $\text{MeCN}/\text{H}_2\text{O}$ .....                                 | 27 |
| <b>Figure 45S.</b> | $^1\text{H}$ (500 MHz) and $^{13}\text{C}$ (125 MHz) NMR data of compound 24 in $\text{CD}_3\text{OD}$ , 25°C; on-line PDA UV spectrum in $\text{MeCN}/\text{H}_2\text{O}$ .....                                 | 28 |
| <b>Figure 46S.</b> | $^1\text{H}$ (500 MHz) and $^{13}\text{C}$ (125 MHz) NMR data of compound 25 in $\text{CD}_3\text{OD}$ , 25°C; on-line PDA UV spectrum in $\text{MeCN}/\text{H}_2\text{O}$ .....                                 | 28 |
| <b>Figure 47S.</b> | $^1\text{H}$ (500 MHz) and $^{13}\text{C}$ (125 MHz) NMR data of compound 26 in $\text{DMSO}-d_6$ , 25°C; on-line PDA UV spectrum in $\text{MeCN}/\text{H}_2\text{O}$ .....                                      | 29 |
| <b>Figure 48S.</b> | $^1\text{H}$ (500 MHz) and $^{13}\text{C}$ (125 MHz) NMR data of compound 27 in $\text{CD}_3\text{OD}$ , 25°C; on-line PDA UV spectrum in $\text{MeCN}/\text{H}_2\text{O}$ ; ECD spectrum in $\text{MeOH}$ ..... | 29 |
| <b>Figure 49S.</b> | $^1\text{H}$ (500 MHz) and $^{13}\text{C}$ (125 MHz) NMR data of compound 28 in $\text{CD}_3\text{OD}$ , 25°C; on-line PDA UV spectrum in $\text{MeCN}/\text{H}_2\text{O}$ .....                                 | 30 |
| <b>Figure 50S.</b> | $^1\text{H}$ (500 MHz) and $^{13}\text{C}$ (125 MHz) NMR data of compound 29 in $\text{CD}_3\text{OD}$ , 25°C; on-line PDA UV spectrum in $\text{MeCN}/\text{H}_2\text{O}$ ; ECD spectrum in $\text{MeOH}$ ..... | 30 |
| <b>Figure 51S.</b> | $^1\text{H}$ (500 MHz) and $^{13}\text{C}$ (125 MHz) NMR data of compound 30 in $\text{CD}_3\text{OD}$ , 25°C; on-line PDA UV spectrum in $\text{MeCN}/\text{H}_2\text{O}$ .....                                 | 31 |
| <b>Figure 52S.</b> | $^1\text{H}$ NMR spectrum of compound 30.....                                                                                                                                                                    | 31 |
| <b>Figure 53S.</b> | $^{13}\text{C}$ DEPTQ NMR spectrum of compound 30.....                                                                                                                                                           | 32 |
| <b>Figure 54S.</b> | $^1\text{H}$ - $^1\text{H}$ COSY NMR spectrum of compound 30 .....                                                                                                                                               | 32 |
| <b>Figure 55S.</b> | $^1\text{H}$ - $^1\text{H}$ TROESY (250 ms) NMR spectrum of compound 30 .....                                                                                                                                    | 33 |
| <b>Figure 56S.</b> | $^1\text{H}$ - $^{13}\text{C}$ HSQC NMR spectrum of compound 30.....                                                                                                                                             | 33 |
| <b>Figure 57S.</b> | $^1\text{H}$ - $^{13}\text{C}$ H2BC NMR spectrum of compound 30 .....                                                                                                                                            | 34 |
| <b>Figure 58S.</b> | $^1\text{H}$ - $^{13}\text{C}$ HMBC (8 Hz) NMR spectrum of compound 30 .....                                                                                                                                     | 34 |
| <b>Figure 59S.</b> | $^1\text{H}$ (500 MHz) and $^{13}\text{C}$ (125 MHz) NMR data of compound 31 in $\text{CD}_3\text{OD}$ , 25°C; on-line PDA UV spectrum in $\text{MeCN}/\text{H}_2\text{O}$ .....                                 | 35 |
| <b>Figure 60S.</b> | $^1\text{H}$ (500 MHz) and $^{13}\text{C}$ (125 MHz) NMR data of compound 32 in $\text{CD}_3\text{OD}$ , 25°C; on-line PDA UV spectrum in $\text{MeCN}/\text{H}_2\text{O}$ .....                                 | 35 |
| <b>Figure 61S.</b> | $^1\text{H}$ NMR spectrum of compound 32.....                                                                                                                                                                    | 36 |
| <b>Figure 62S.</b> | $^{13}\text{C}$ DEPTQ NMR spectrum of compound 32.....                                                                                                                                                           | 36 |

|                    |                                                                                                                                                                                                                  |    |
|--------------------|------------------------------------------------------------------------------------------------------------------------------------------------------------------------------------------------------------------|----|
| <b>Figure 63S.</b> | $^1\text{H}$ - $^1\text{H}$ COSY NMR spectrum of compound 32 .....                                                                                                                                               | 37 |
| <b>Figure 64S.</b> | $^1\text{H}$ - $^1\text{H}$ TROESY (250 ms) NMR spectrum of compound 32 .....                                                                                                                                    | 37 |
| <b>Figure 65S.</b> | $^1\text{H}$ - $^{13}\text{C}$ HSQC NMR spectrum of compound 32 .....                                                                                                                                            | 38 |
| <b>Figure 66S.</b> | $^1\text{H}$ - $^{13}\text{C}$ H2BC NMR spectrum of compound 32 .....                                                                                                                                            | 38 |
| <b>Figure 67S.</b> | $^1\text{H}$ - $^{13}\text{C}$ HMBC (8 Hz) NMR spectrum of compound 32 .....                                                                                                                                     | 39 |
| <b>Figure 68S.</b> | $^1\text{H}$ (500 MHz) and $^{13}\text{C}$ (125 MHz) NMR data of compound 33 in $\text{CD}_3\text{OD}$ , 25°C; on-line PDA UV spectrum in $\text{MeCN}/\text{H}_2\text{O}$ .....                                 | 39 |
| <b>Figure 69S.</b> | $^1\text{H}$ (500 MHz) and $^{13}\text{C}$ (125 MHz) NMR data of compound 34 in $\text{CD}_3\text{OD}$ , 25°C; on-line PDA UV spectrum in $\text{MeCN}/\text{H}_2\text{O}$ ; ECD spectrum in $\text{MeOH}$ ..... | 40 |
| <b>Figure 70S.</b> | $^1\text{H}$ (500 MHz) and $^{13}\text{C}$ (125 MHz) NMR data of compound 35 in $\text{CD}_3\text{OD}$ , 25°C; on-line PDA UV spectrum in $\text{MeCN}/\text{H}_2\text{O}$ ; ECD spectrum in $\text{MeOH}$ ..... | 40 |
| <b>Figure 71S.</b> | $^1\text{H}$ NMR spectrum of compound 35.....                                                                                                                                                                    | 41 |
| <b>Figure 72S.</b> | $^{13}\text{C}$ DEPTQ NMR spectrum of compound 35.....                                                                                                                                                           | 41 |
| <b>Figure 73S.</b> | $^1\text{H}$ - $^1\text{H}$ COSY NMR spectrum of compound 35 .....                                                                                                                                               | 42 |
| <b>Figure 74S.</b> | $^1\text{H}$ - $^1\text{H}$ TROESY (250 ms) NMR spectrum of compound 35 .....                                                                                                                                    | 42 |
| <b>Figure 75S.</b> | $^1\text{H}$ - $^{13}\text{C}$ HSQC NMR spectrum of compound 35.....                                                                                                                                             | 43 |
| <b>Figure 76S.</b> | $^1\text{H}$ - $^{13}\text{C}$ H2BC NMR spectrum of compound 35 .....                                                                                                                                            | 43 |
| <b>Figure 77S.</b> | $^1\text{H}$ - $^{13}\text{C}$ HMBC (8 Hz) NMR spectrum of compound 35 .....                                                                                                                                     | 44 |
| <b>Figure 78S.</b> | $^1\text{H}$ (500 MHz) and $^{13}\text{C}$ (125 MHz) NMR data of compound 36 in $\text{CD}_3\text{OD}$ , 25°C; on-line PDA UV spectrum in $\text{MeCN}/\text{H}_2\text{O}$ ; ECD spectrum in $\text{MeOH}$ ..... | 44 |
| <b>Figure 79S.</b> | $^1\text{H}$ (500 MHz) and $^{13}\text{C}$ (125 MHz) NMR data of compound 37 in $\text{CD}_3\text{OD}$ , 25°C; on-line PDA UV spectrum in $\text{MeCN}/\text{H}_2\text{O}$ .....                                 | 45 |
| <b>Figure 80S.</b> | $^1\text{H}$ (500 MHz) and $^{13}\text{C}$ (125 MHz) NMR data of compound 38 in $\text{CD}_3\text{OD}$ , 25°C; on-line PDA UV spectrum in $\text{MeCN}/\text{H}_2\text{O}$ .....                                 | 45 |
| <b>Figure 81S.</b> | $^1\text{H}$ NMR spectrum of compound 38.....                                                                                                                                                                    | 46 |
| <b>Figure 82S.</b> | $^{13}\text{C}$ DEPTQ NMR spectrum of compound 38.....                                                                                                                                                           | 46 |
| <b>Figure 83S.</b> | $^1\text{H}$ - $^1\text{H}$ COSY NMR spectrum of compound 38 .....                                                                                                                                               | 47 |
| <b>Figure 84S.</b> | $^1\text{H}$ - $^1\text{H}$ NOESY (300 ms) NMR spectrum of compound 38.....                                                                                                                                      | 47 |
| <b>Figure 85S.</b> | $^1\text{H}$ - $^{13}\text{C}$ HSQC NMR spectrum of compound 38.....                                                                                                                                             | 48 |
| <b>Figure 86S.</b> | $^1\text{H}$ - $^{13}\text{C}$ H2BC NMR spectrum of compound 38 .....                                                                                                                                            | 48 |
| <b>Figure 87S.</b> | $^1\text{H}$ - $^{13}\text{C}$ HMBC (8 Hz) NMR spectrum of compound 38 .....                                                                                                                                     | 49 |
| <b>Figure 88S.</b> | $^1\text{H}$ (500 MHz) and $^{13}\text{C}$ (125 MHz) NMR data of compound 39 in $\text{CD}_3\text{OD}$ , 25°C.....                                                                                               | 49 |
| <b>Figure 89S.</b> | $^1\text{H}$ NMR spectrum of compound 39.....                                                                                                                                                                    | 50 |
| <b>Figure 90S.</b> | $^{13}\text{C}$ DEPTQ NMR spectrum of compound 39.....                                                                                                                                                           | 50 |
| <b>Figure 91S.</b> | $^1\text{H}$ - $^1\text{H}$ COSY NMR spectrum of compound 39 .....                                                                                                                                               | 51 |
| <b>Figure 92S.</b> | $^1\text{H}$ - $^1\text{H}$ NOESY (300 ms) NMR spectrum of compound 39.....                                                                                                                                      | 51 |
| <b>Figure 93S.</b> | $^1\text{H}$ - $^{13}\text{C}$ HSQC NMR spectrum of compound 39.....                                                                                                                                             | 52 |
| <b>Figure 94S.</b> | $^1\text{H}$ - $^{13}\text{C}$ H2BC NMR spectrum of compound 39 .....                                                                                                                                            | 52 |
| <b>Figure 95S.</b> | $^1\text{H}$ - $^{13}\text{C}$ HMBC (8 Hz) NMR spectrum of compound 39 .....                                                                                                                                     | 53 |
| <b>Figure 96S.</b> | $^1\text{H}$ (500 MHz) and $^{13}\text{C}$ (125 MHz) NMR data of compound 40 in $\text{CD}_3\text{OD}$ , 25°C; on-line PDA UV spectrum in $\text{MeCN}/\text{H}_2\text{O}$ ; ECD spectrum in $\text{MeOH}$ ..... | 53 |

|                     |                                                                                                                                                                                                                  |    |
|---------------------|------------------------------------------------------------------------------------------------------------------------------------------------------------------------------------------------------------------|----|
| <b>Figure 97S.</b>  | $^1\text{H}$ (500 MHz) and $^{13}\text{C}$ (125 MHz) NMR data of compound 41 in $\text{CD}_3\text{OD}$ , 25°C; on-line PDA UV spectrum in $\text{MeCN}/\text{H}_2\text{O}$ ; ECD spectrum in $\text{MeOH}$ ..... | 54 |
| <b>Figure 98S.</b>  | $^1\text{H}$ NMR spectrum of compound 41.....                                                                                                                                                                    | 54 |
| <b>Figure 99S.</b>  | $^{13}\text{C}$ DEPTQ NMR spectrum of compound 41.....                                                                                                                                                           | 55 |
| <b>Figure 100S.</b> | $^1\text{H}$ - $^1\text{H}$ COSY NMR spectrum of compound 41 .....                                                                                                                                               | 55 |
| <b>Figure 101S.</b> | $^1\text{H}$ - $^1\text{H}$ TROESY (250 ms) NMR spectrum of compound 41 .....                                                                                                                                    | 56 |
| <b>Figure 102S.</b> | $^1\text{H}$ - $^{13}\text{C}$ HSQC NMR spectrum of compound 41.....                                                                                                                                             | 56 |
| <b>Figure 103S.</b> | $^1\text{H}$ - $^{13}\text{C}$ H2BC NMR spectrum of compound 41 .....                                                                                                                                            | 57 |
| <b>Figure 104S.</b> | $^1\text{H}$ - $^{13}\text{C}$ HMBC (8 Hz) NMR spectrum of compound 41 .....                                                                                                                                     | 57 |
| <b>Figure 105S.</b> | $^1\text{H}$ (500 MHz) and $^{13}\text{C}$ (125 MHz) NMR data of compound 43 in $\text{CD}_3\text{OD}$ , 25°C; on-line PDA UV spectrum in $\text{MeCN}/\text{H}_2\text{O}$ .....                                 | 58 |
| <b>Figure 106S.</b> | $^1\text{H}$ (500 MHz) and $^{13}\text{C}$ (125 MHz) NMR data of compound 44 in $\text{CD}_3\text{OD}$ , 25°C; on-line PDA UV spectrum in $\text{MeCN}/\text{H}_2\text{O}$ .....                                 | 58 |
| <b>Table S1.</b>    | .....                                                                                                                                                                                                            | 59 |
| <b>Figure 107S.</b> | Frequency distribution of the relative standard deviation for the peak intensities and peak numbers in QC samples.....                                                                                           | 60 |



POAmz297Fr\_II\_p15-28\_flash\_4-2

Chemical Formula:  $C_{13}H_{14}O_8$   
Exact Mass: 298,0689

NEW!

MeOH- $d_4$ , 25°C

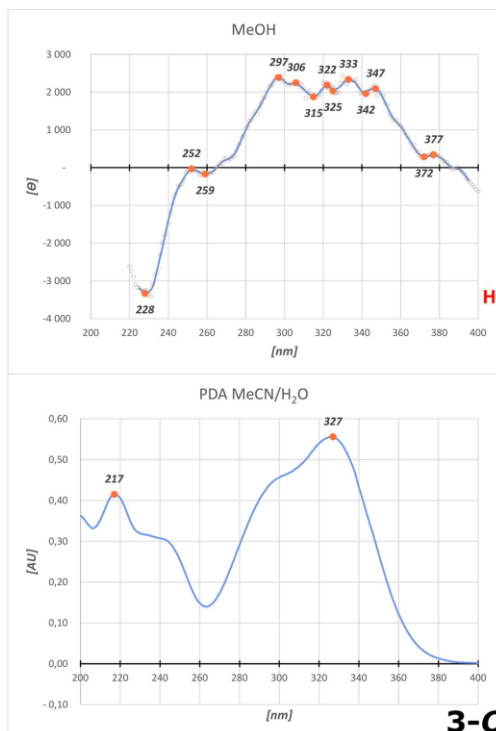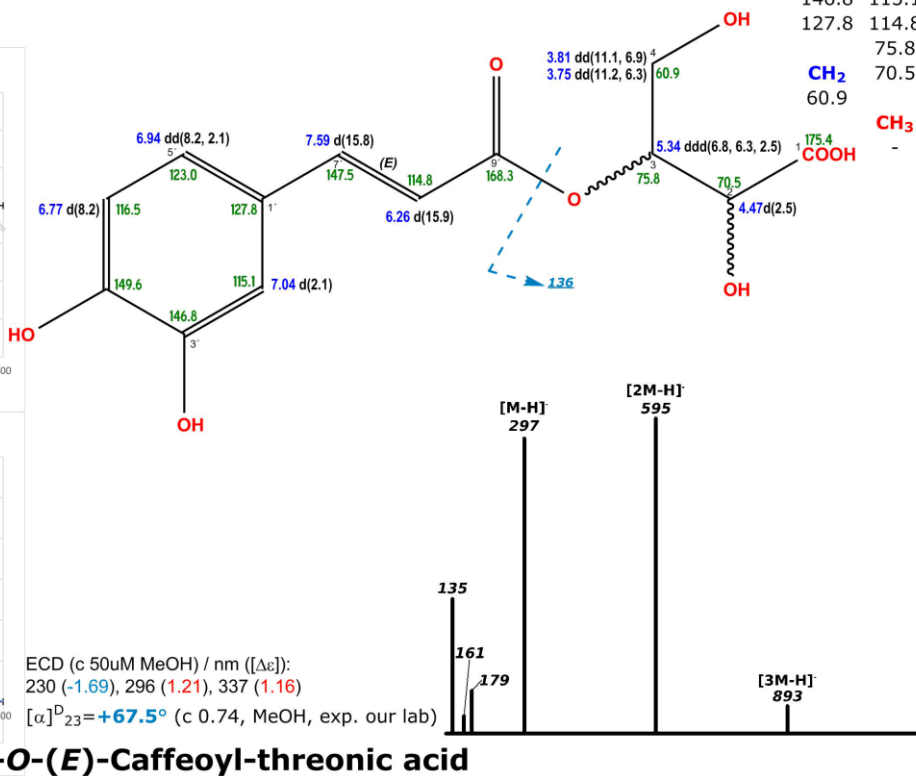

| Quat  | CH              |
|-------|-----------------|
| 175.4 | 147.5           |
| 168.3 | 123.0           |
| 149.6 | 116.5           |
| 146.8 | 115.1           |
| 127.8 | 114.8           |
|       | 75.8            |
|       | 70.5            |
|       | 60.9            |
|       | CH <sub>3</sub> |
|       | -               |

Figure 3S. <sup>1</sup>H (500 MHz) and <sup>13</sup>C (125 MHz) NMR data of compound 3 in CD<sub>3</sub>OD, 25°C; on-line PDA UV spectrum in MeCN/H<sub>2</sub>O, ECD spectrum in MeOH

<sup>1</sup>H NS16 CD3OD 25°C - NS=16

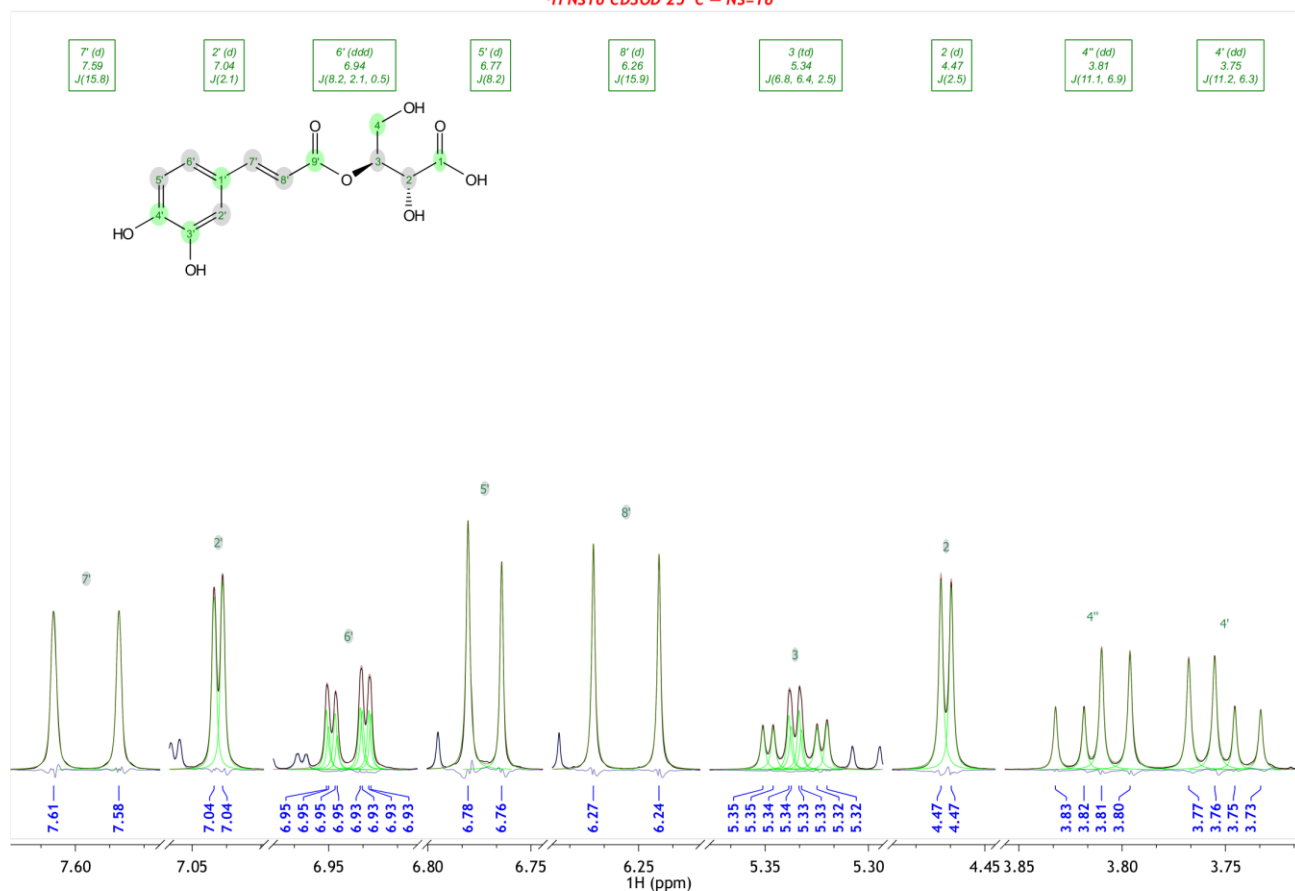

Figure 4S. <sup>1</sup>H NMR spectrum of compound 3

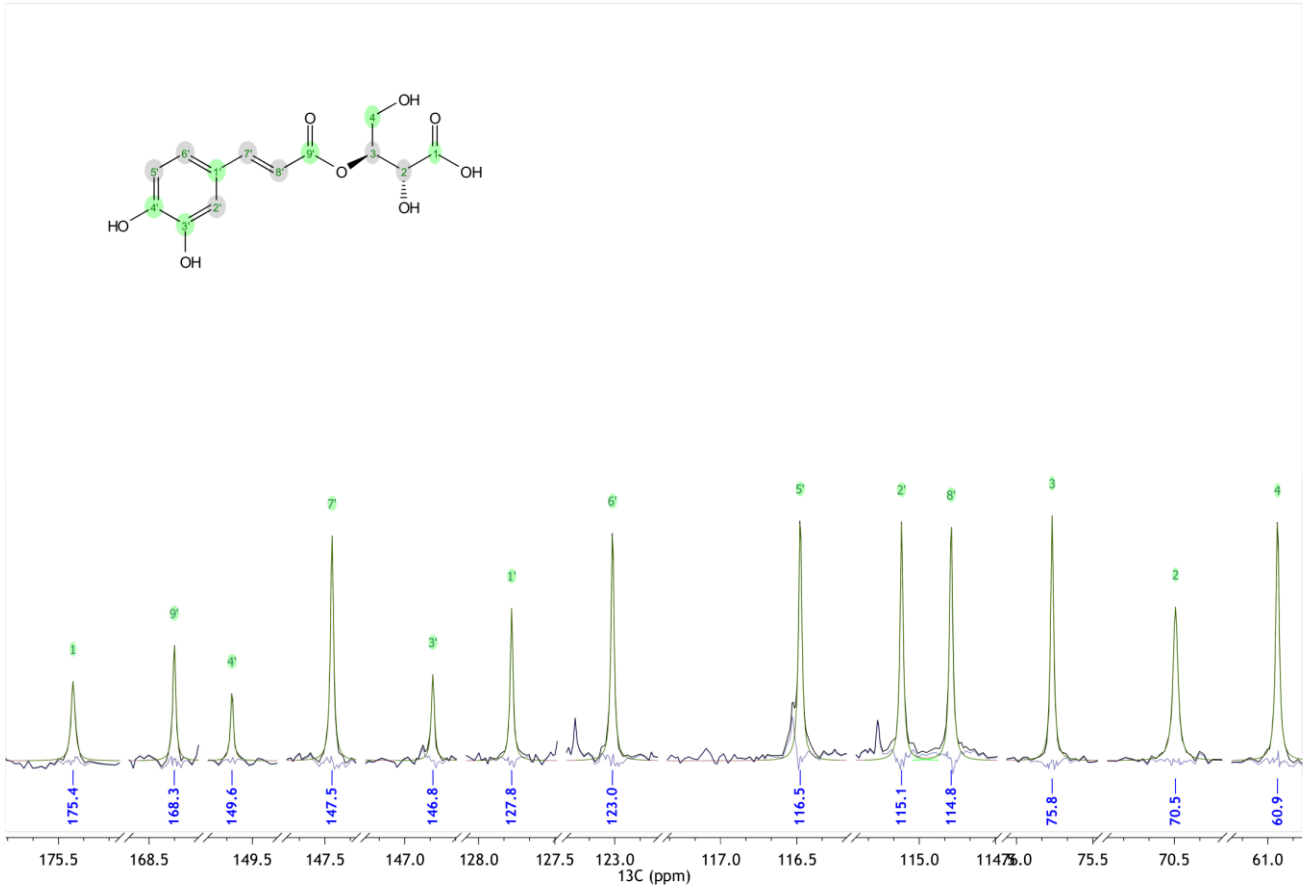

Figure 5S. <sup>13</sup>C UDEFT NMR spectrum of compound 3

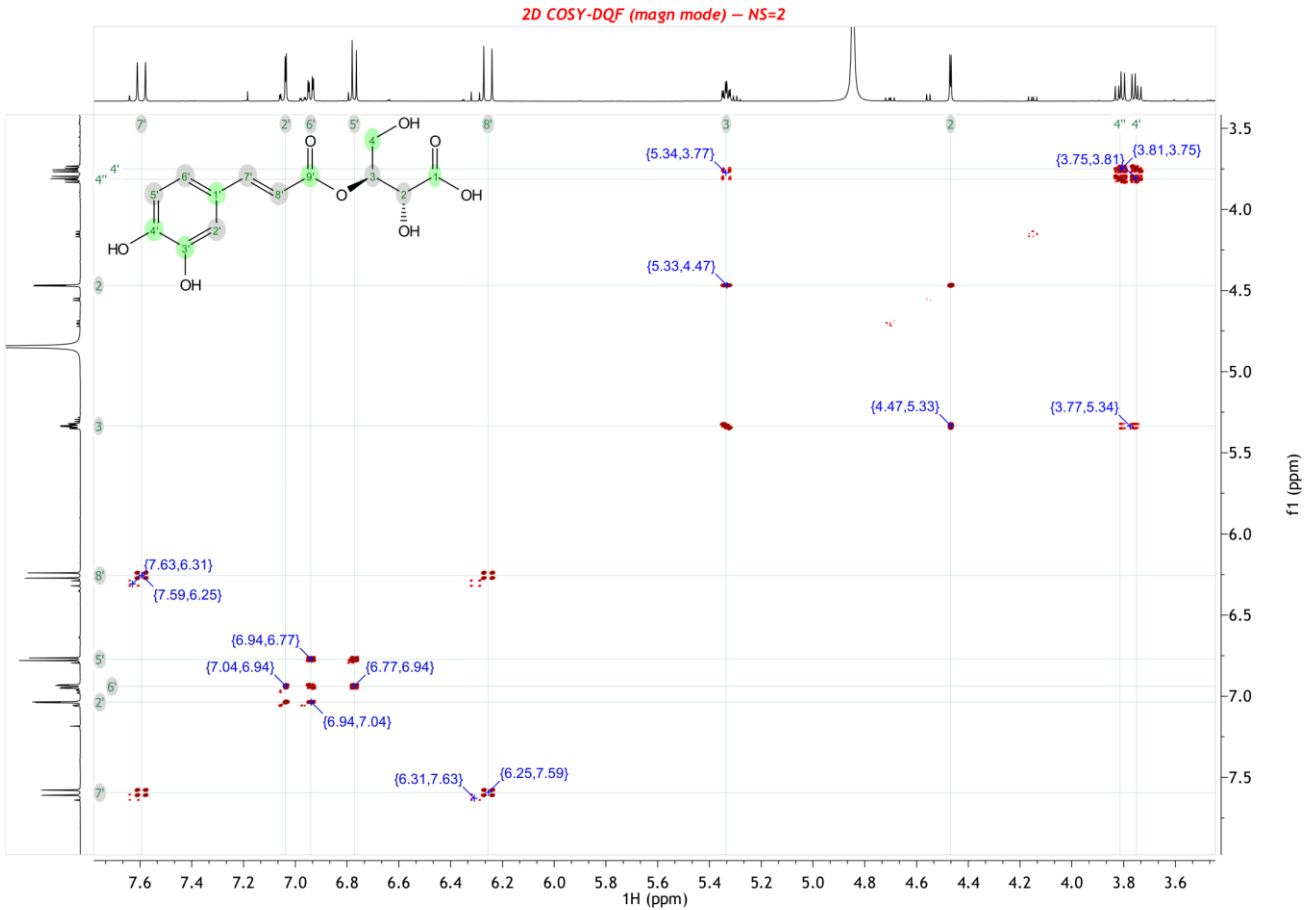

Figure 6S. <sup>1</sup>H-<sup>1</sup>H COSY NMR spectrum of compound 3



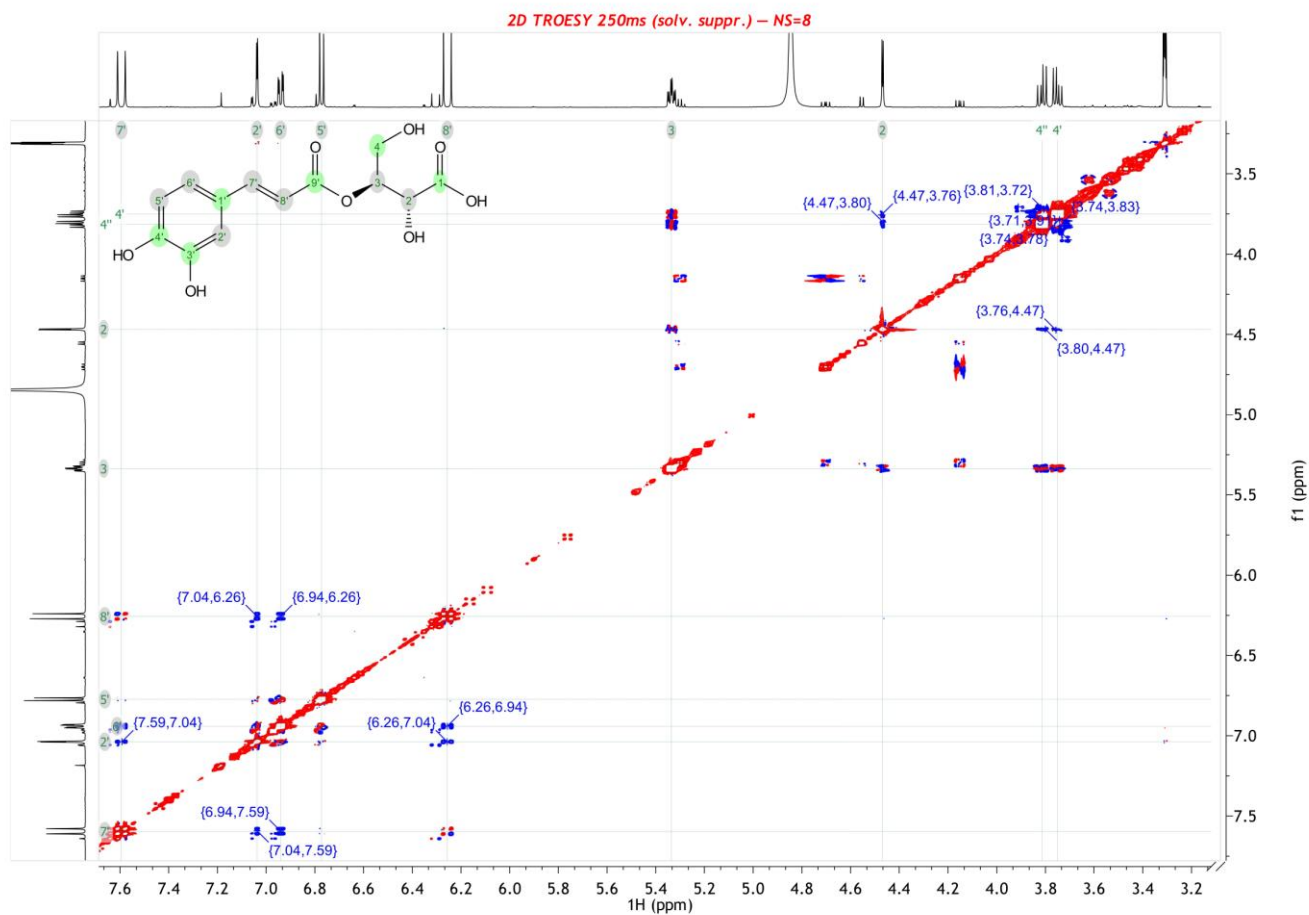

**Figure 7S.**  $^1\text{H}$ - $^1\text{H}$  TROESY (250 ms) NMR spectrum of compound 3

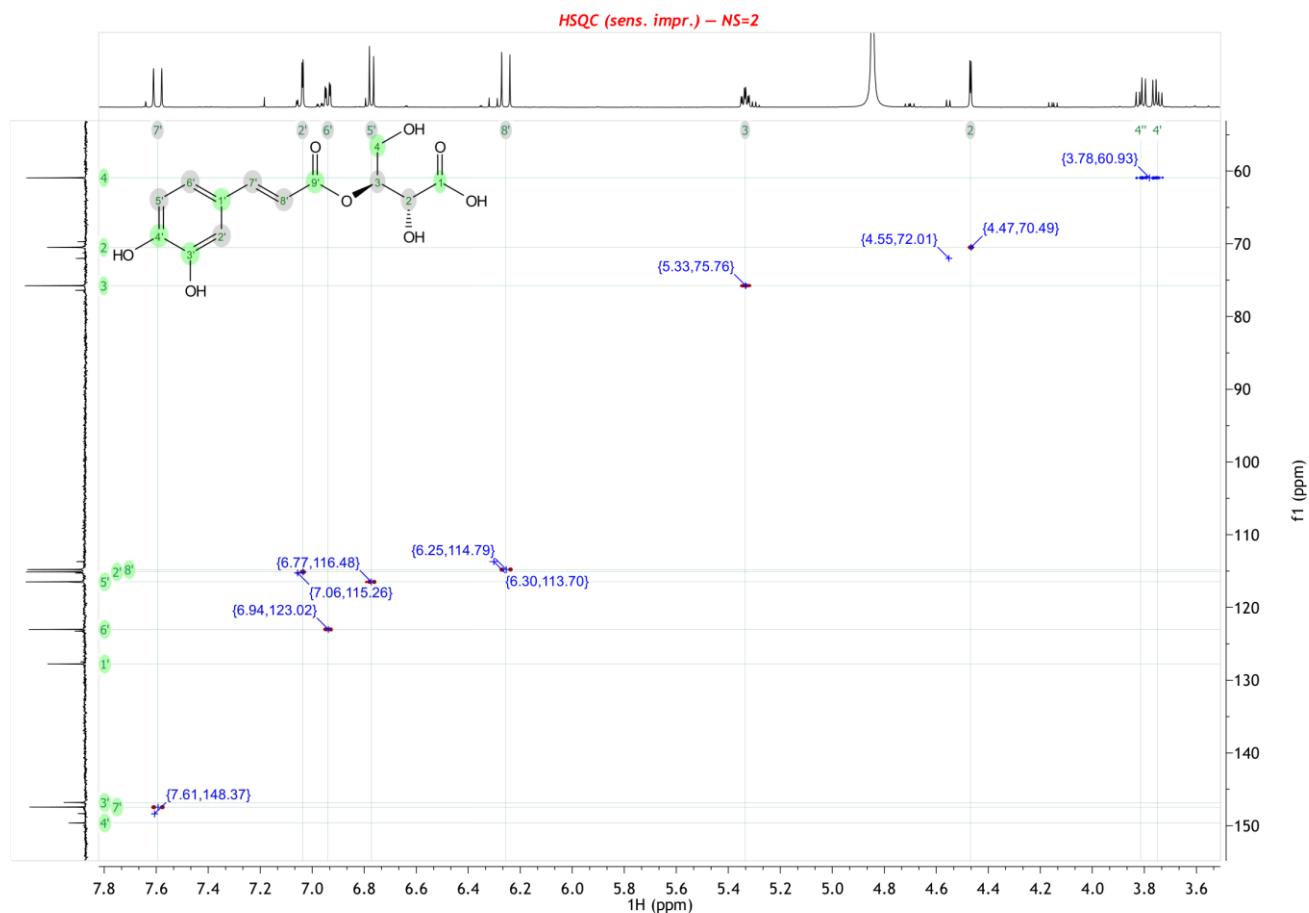

**Figure 8S.**  $^1\text{H}$ - $^{13}\text{C}$  HSQC NMR spectrum of compound 3

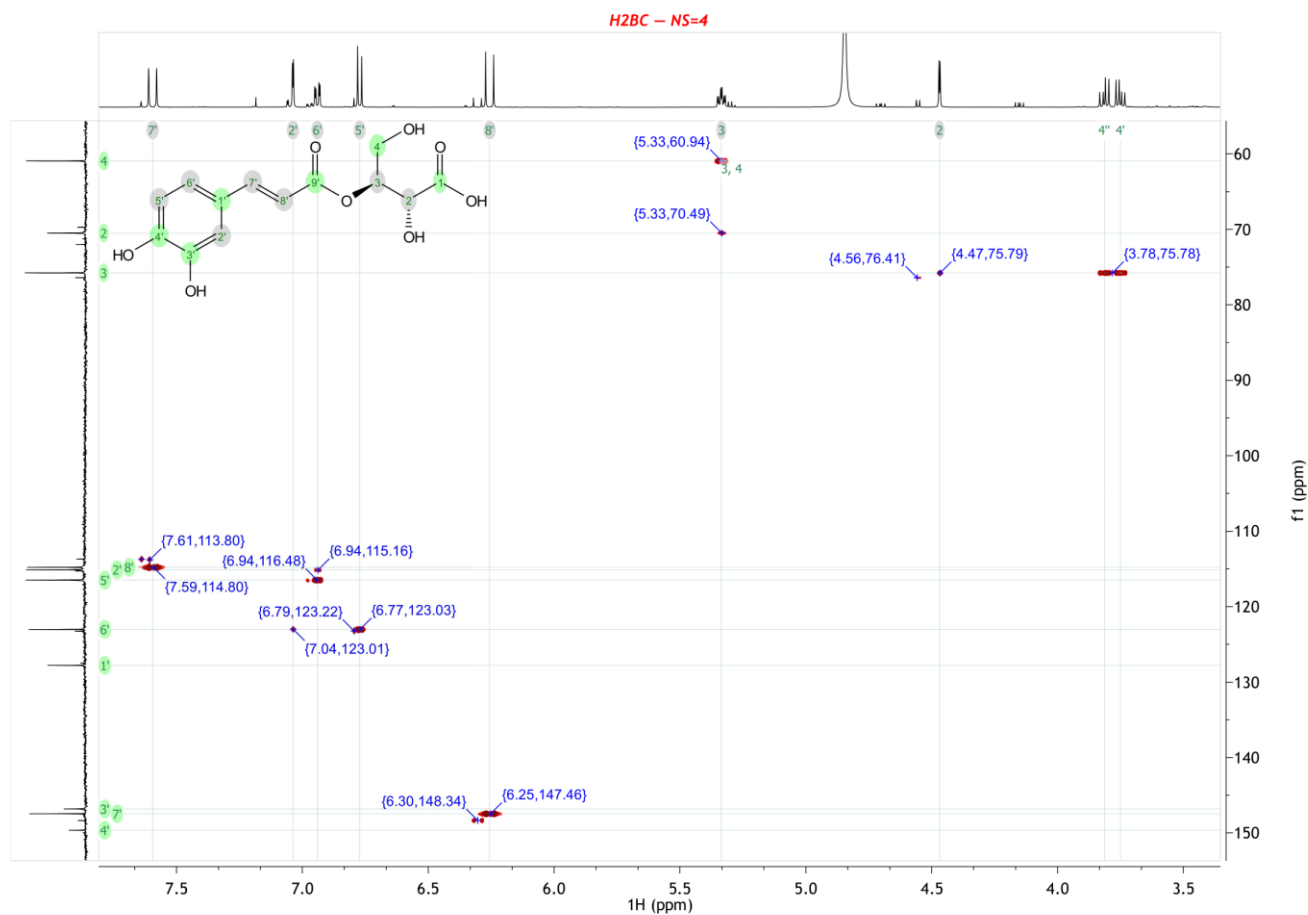

**Figure 9S.**  $^1\text{H}$ - $^{13}\text{C}$  H2BC NMR spectrum of compound 3

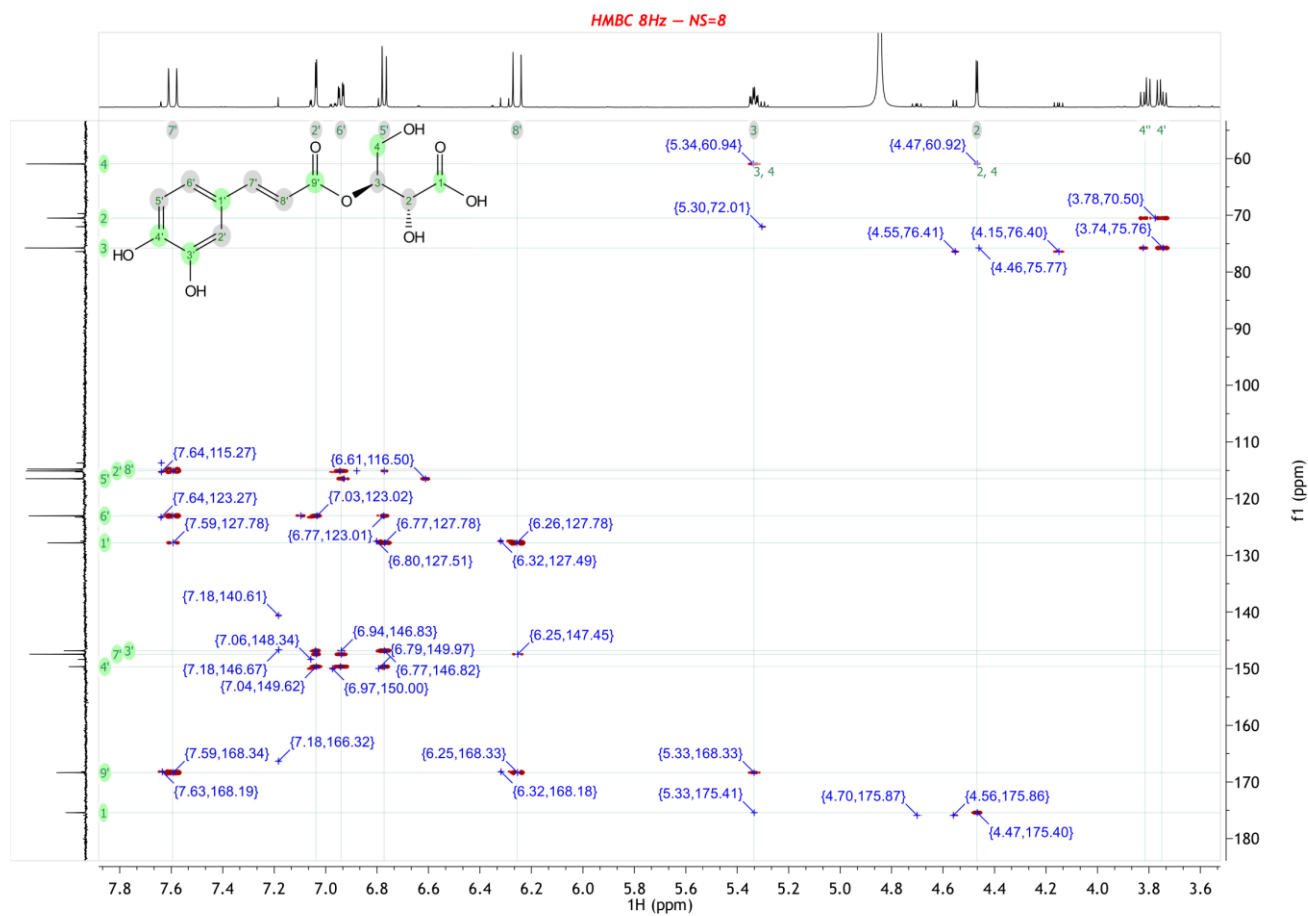

**Figure 10S.**  $^1\text{H}$ - $^{13}\text{C}$  HMBC (8 Hz) NMR spectrum of compound 3

**POAmz297Fr\_II\_p15-28\_flash\_4-3**

Chemical Formula:  $C_{13}H_{14}O_8$   
Exact Mass: 298.0689

**KNOWN**

MeOH- $d_4$ , 25°C

| Quat  | CH    |
|-------|-------|
| 172.4 | 147.8 |
| 168.5 | 123.1 |
| 149.7 | 116.5 |
| 146.9 | 115.2 |
| 127.8 | 114.5 |
|       | 73.7  |
|       | 72.7  |
|       | 63.2  |

**CH<sub>2</sub>** 72.7

63.2

**CH<sub>3</sub>** -

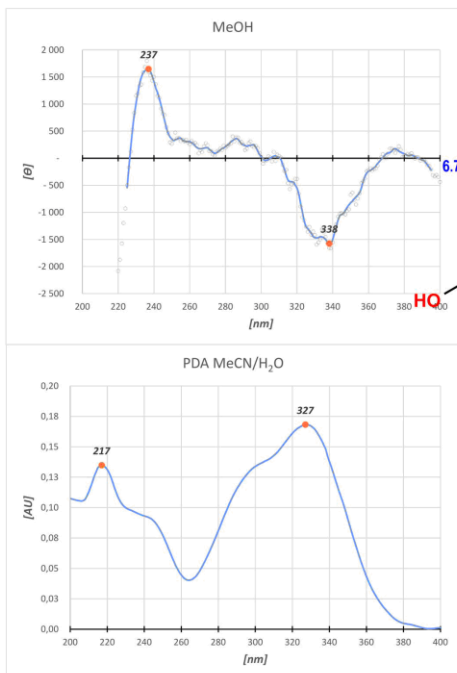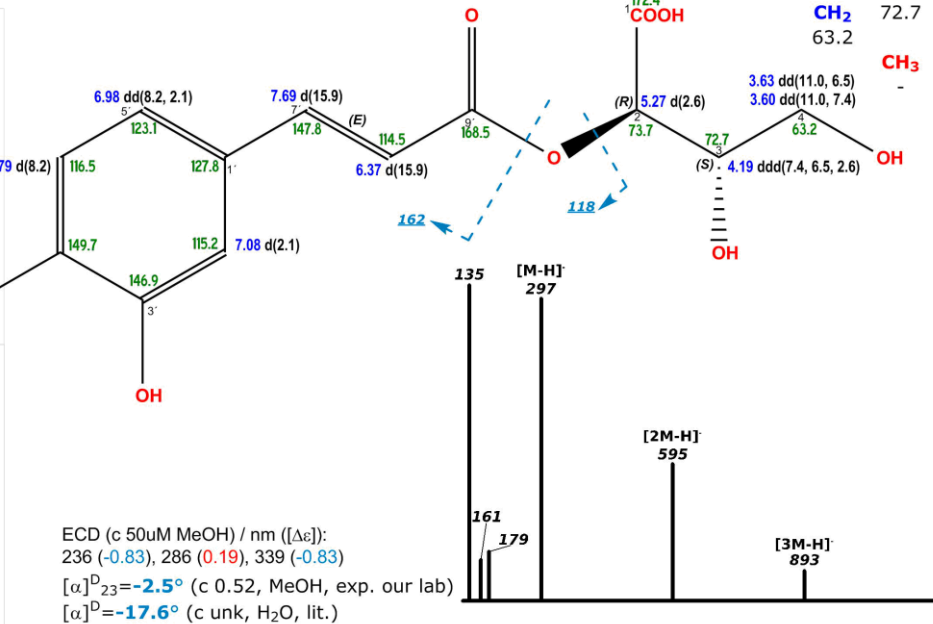

**2-O-(E)-Caffeoyl-L-threonic acid**

1. Kuczkowiak, U., Petereit, F., Nahrstedt, A., 2014. Hydroxycinnamic Acid Derivatives Obtained from a Commercial Crataegus Extract and from Authentic Crataegus spp. Sci. Pharm. 82, 835-846. doi:10.3797/scipharm.1404-02  
2. Parveen, I., Winters, A., Threadgill, M.D., Hauck, B., Morris, P., 2008. Extraction, structural characterisation and evaluation of hydroxycinnamate esters of orchard grass (Dactylis glomerata) as substrates for polyphenol oxidase. Phytochemistry 69, 2799-2806. doi:10.1016/j.phytochem.2008.08.019

**Figure 11S.** <sup>1</sup>H (500 MHz) and <sup>13</sup>C (125 MHz) NMR data of compound 4 in CD<sub>3</sub>OD, 25°C; on-line PDA UV spectrum in MeCN/H<sub>2</sub>O, ECD spectrum in MeOH

**POAmz215Fr\_II\_p19-33\_F2-1**

Chemical Formula:  $C_{12}H_{12}N_2O_2$   
Molecular Weight: 216.2400

**KNOWN**

MeOH- $d_4$ +TFA, 25°C

| Quat  | CH    |
|-------|-------|
| 171.4 | 123.6 |
| 138.5 | 120.7 |
| 127.3 | 118.9 |
| 126.2 | 112.3 |
| 106.4 | 56.5  |

**CH<sub>2</sub>** 41.8  
**CH<sub>3</sub>** -  
23.5

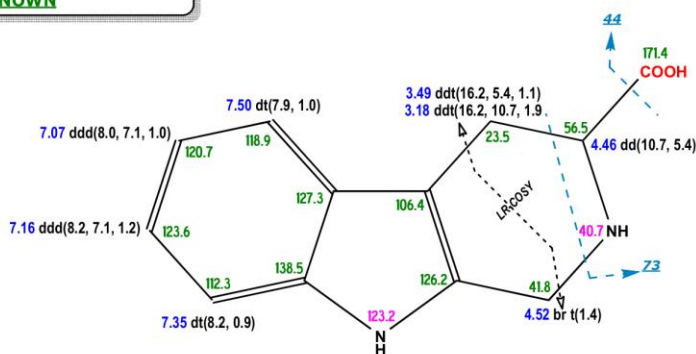

MeOH, 25°C

$[\alpha] =$  (exp. our lab)

-° (exp. data, H<sub>2</sub>O)

**Lycoperodine-1**

**Figure 12S.** <sup>1</sup>H (500 MHz) <sup>13</sup>C (125 MHz) and <sup>15</sup>N (50 MHz) NMR data of compound 5 in CD<sub>3</sub>OD, 25°C

POAmz405Fr\_I\_p41-46\_flash\_3-1

Chemical Formula: C<sub>19</sub>H<sub>34</sub>O<sub>9</sub>  
Molecular Weight: 406,4720

KNOWN

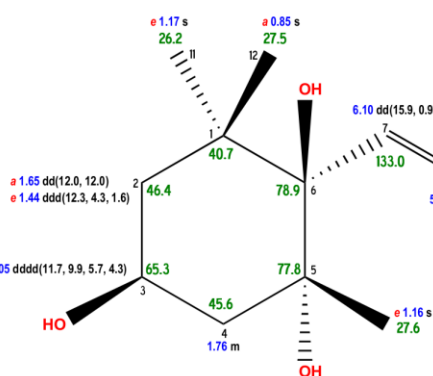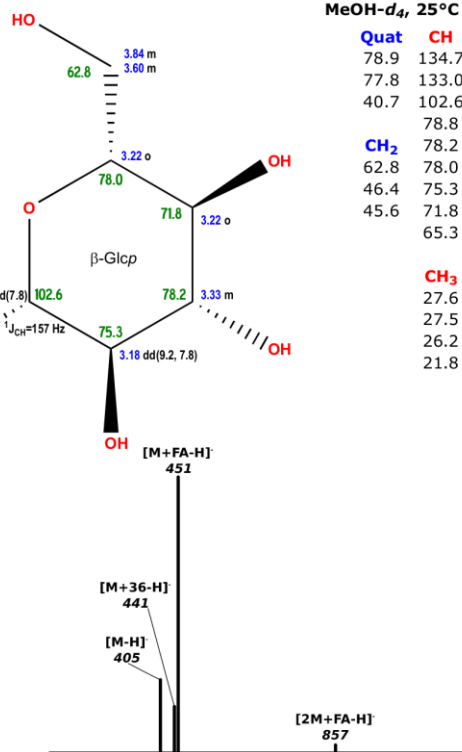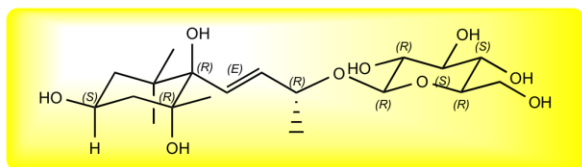

### Actinidioionoside

1. Murai, F., Tagawa, M., 1989. Relationship between ionone glycosides and terpenoids in Actinidia polygama, in: Abstract Papers of the 33rd Symposium on the Chemistry of Terpenes, Essential Oils, and Aromatics (TEAC), Sendai, pp. 68-70.  
2. Otsuka, H., Hirata, E., Shinzato, T., Takeda, Y., 2003. Stereochemistry of megastigmane glycosides from Glochidion zeylanicum and Alangium premmifolium. Phytochemistry 62, 763-768. doi:10.1016/S0031-9422(02)00614-3

Figure 13S. <sup>1</sup>H (500 MHz) and <sup>13</sup>C (125 MHz) NMR data of compound 7 in CD<sub>3</sub>OD, 25°C

POAmz517Fr\_II\_p19-33\_flash\_1-3

Chemical Formula: C<sub>22</sub>H<sub>30</sub>O<sub>14</sub>  
Molecular Weight: 518,4680

NEW!

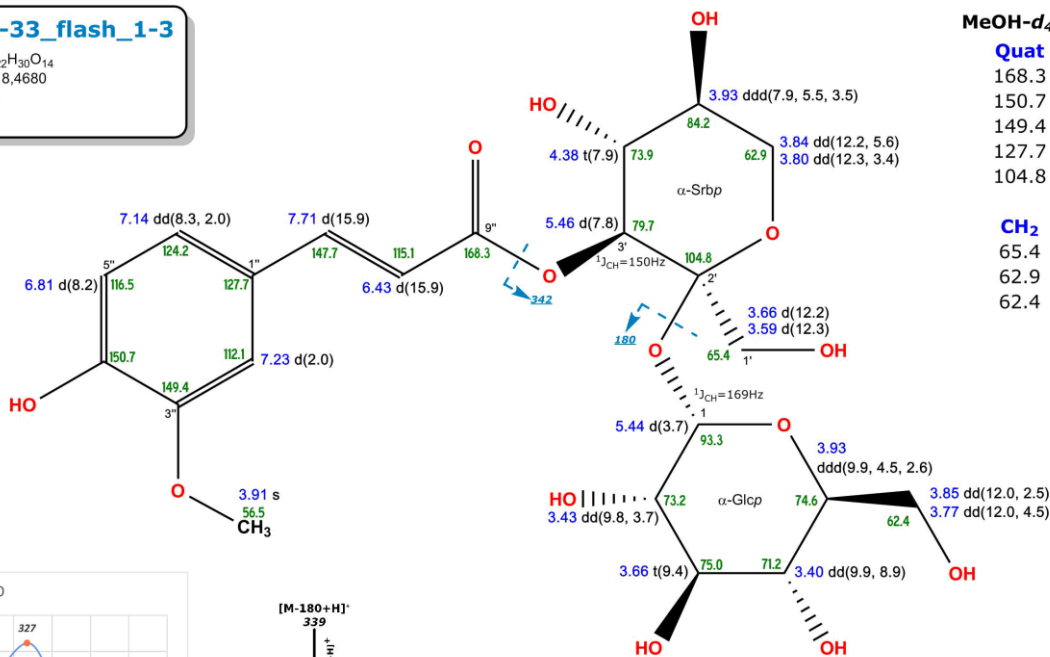

<sup>1</sup>H NS16 CD3OD 25°C – NS=16

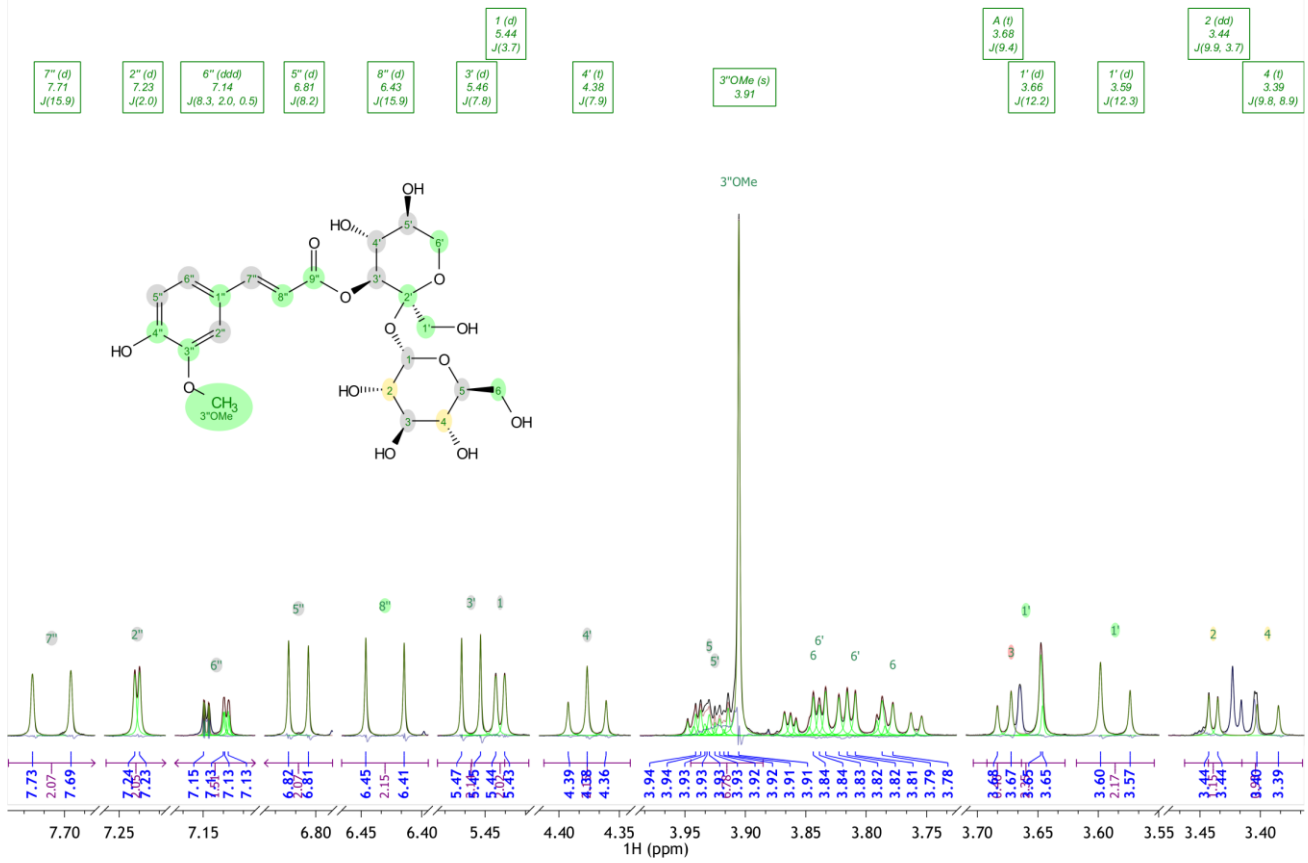

Figure 15S. <sup>1</sup>H NMR spectrum of compound 10

<sup>13</sup>C dec UDEFT – NS=2048

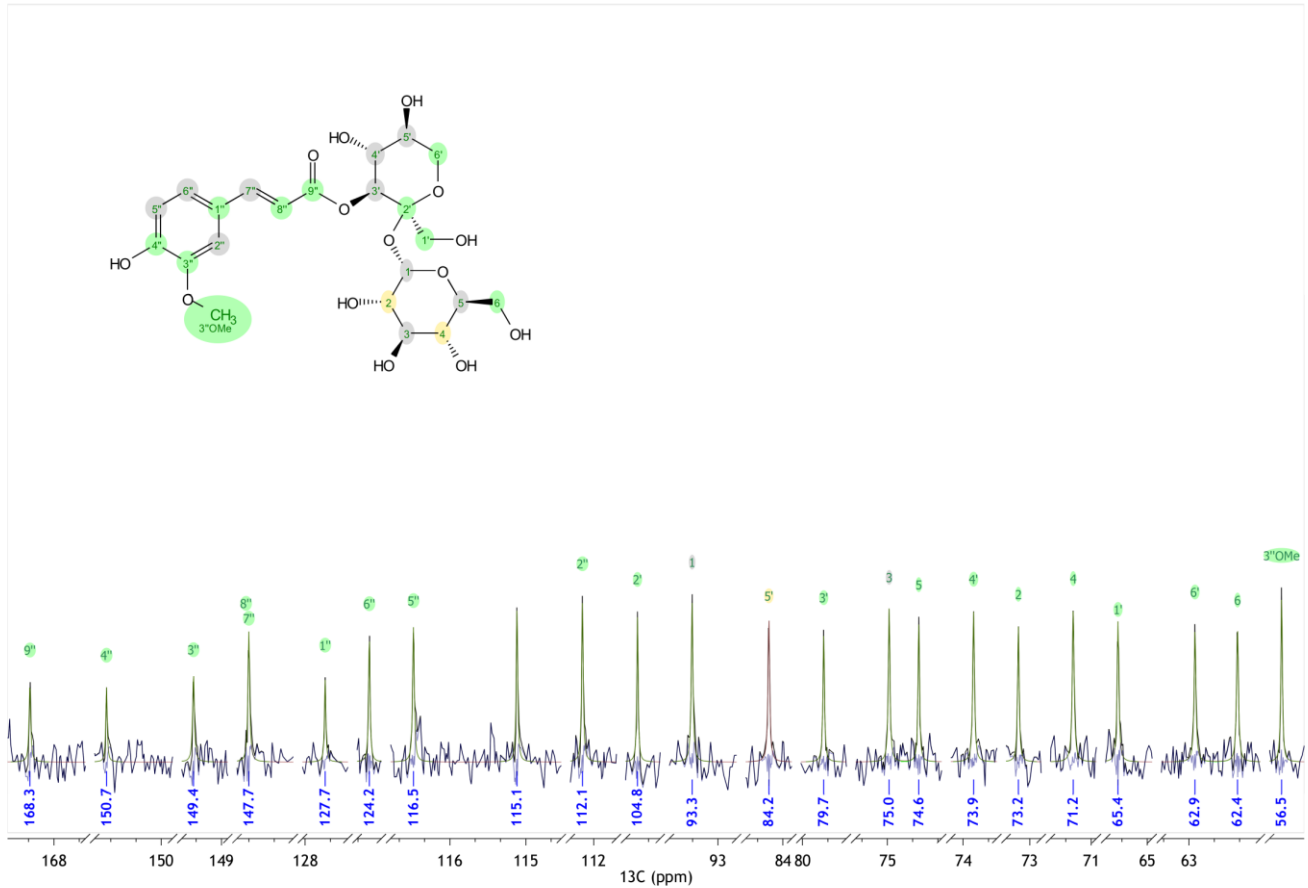

Figure 16S. <sup>13</sup>C DEPTQ NMR spectrum of compound 10

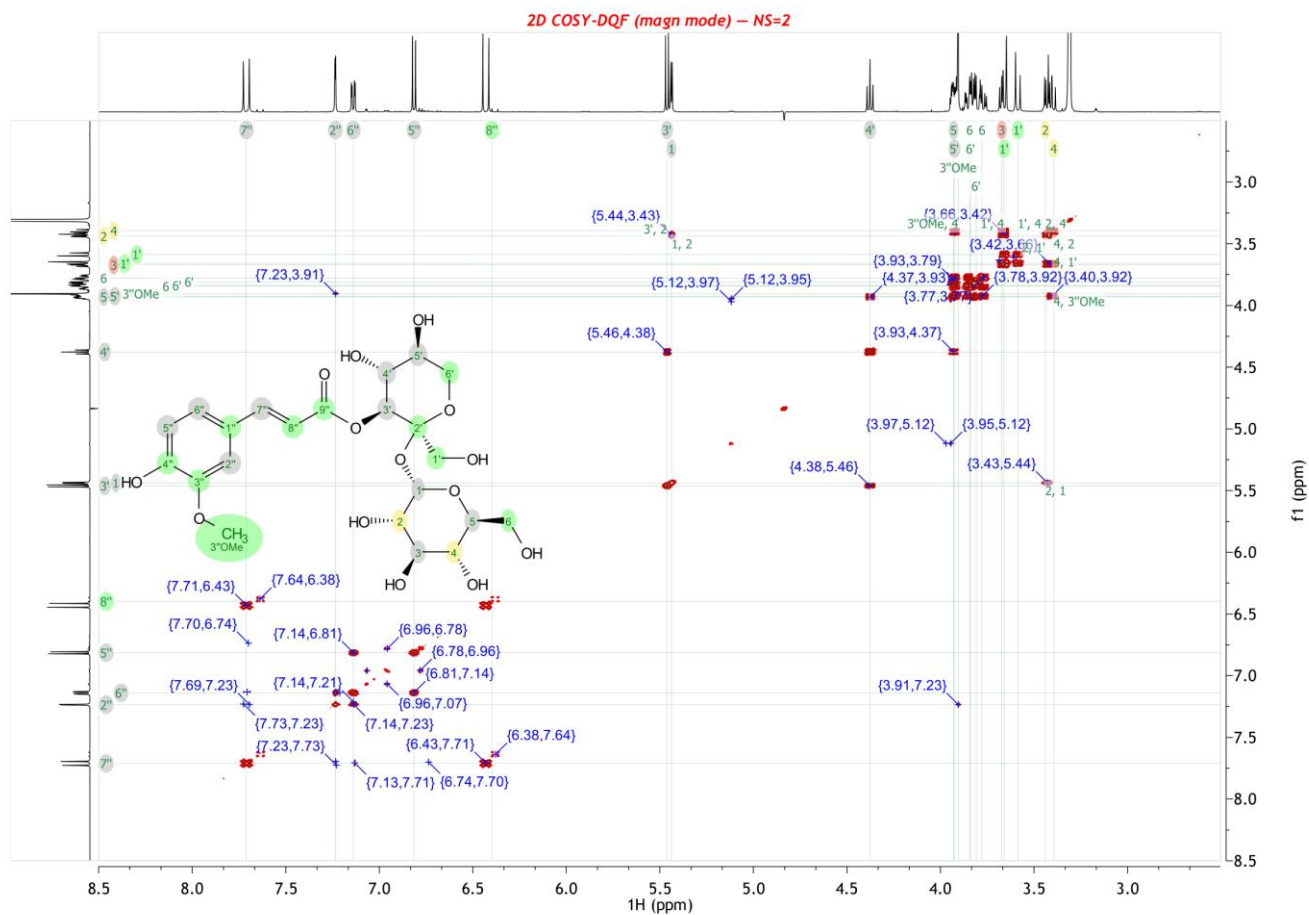

**Figure 17S.**  $^1\text{H}$ - $^1\text{H}$  COSY NMR spectrum of compound 10

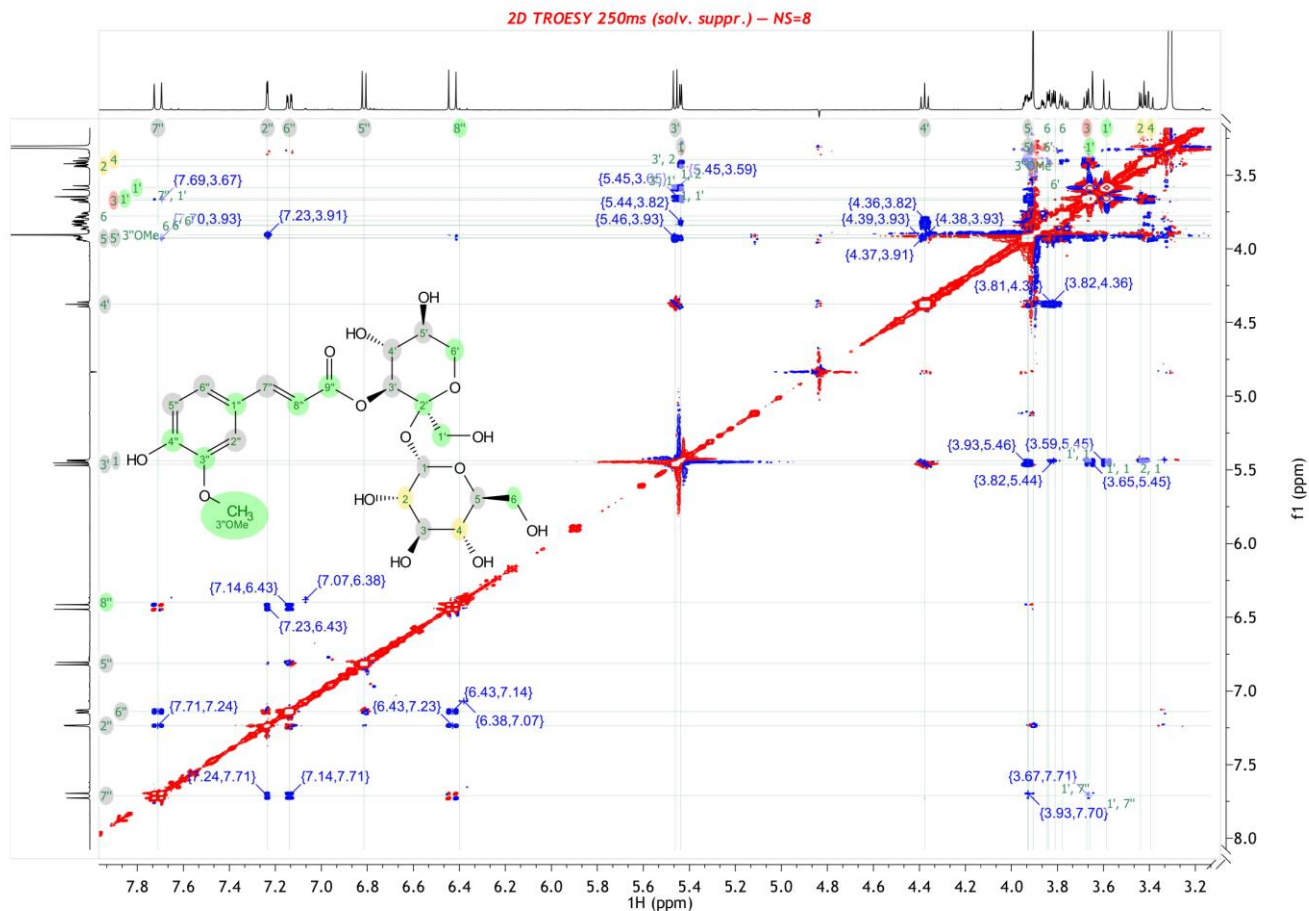

**Figure 18S.**  $^1\text{H}$ - $^1\text{H}$  TROESY (250 ms) NMR spectrum of compound 10

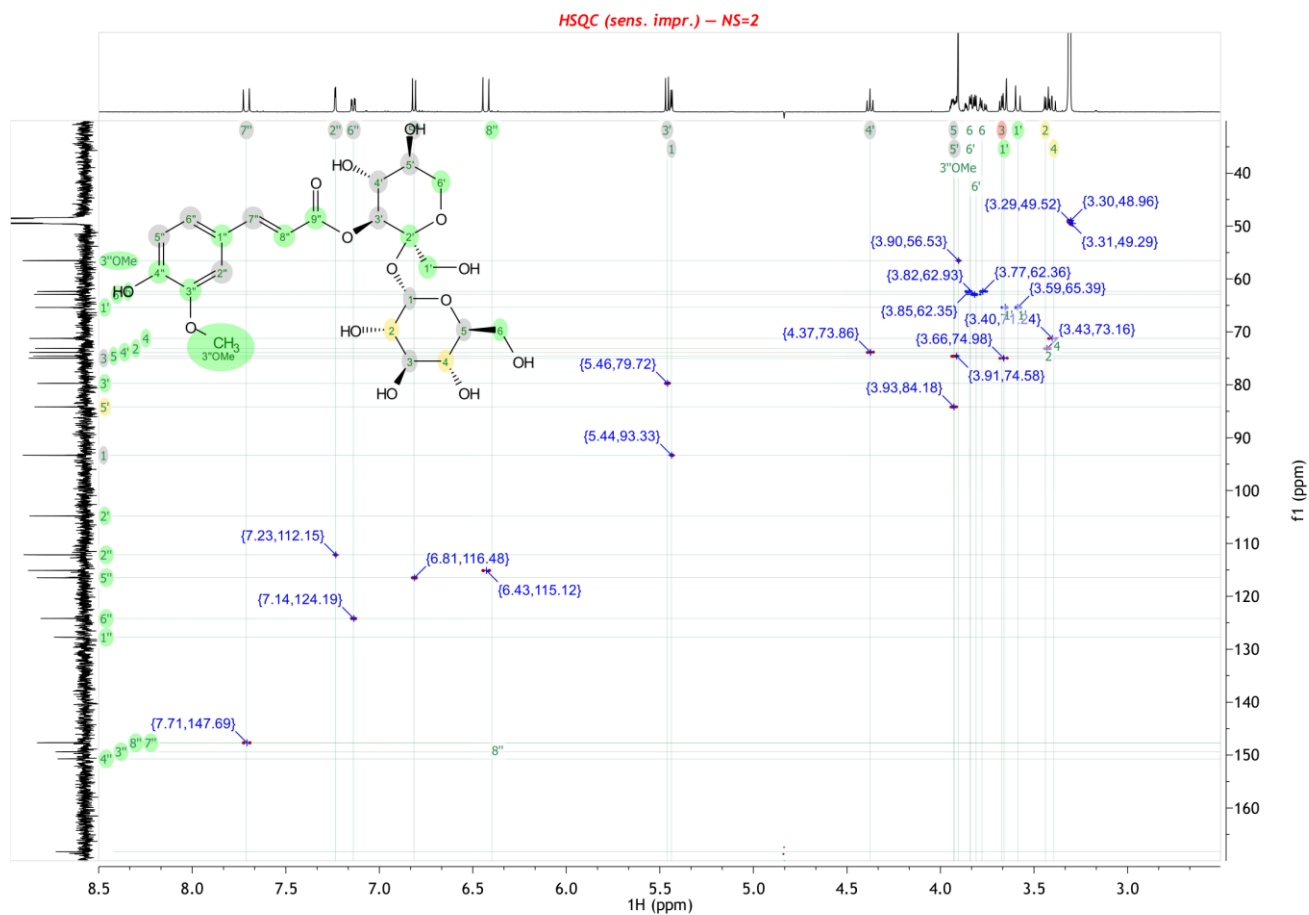

Figure 19S.  $^1\text{H}$ - $^{13}\text{C}$  HSQC NMR spectrum of compound 10

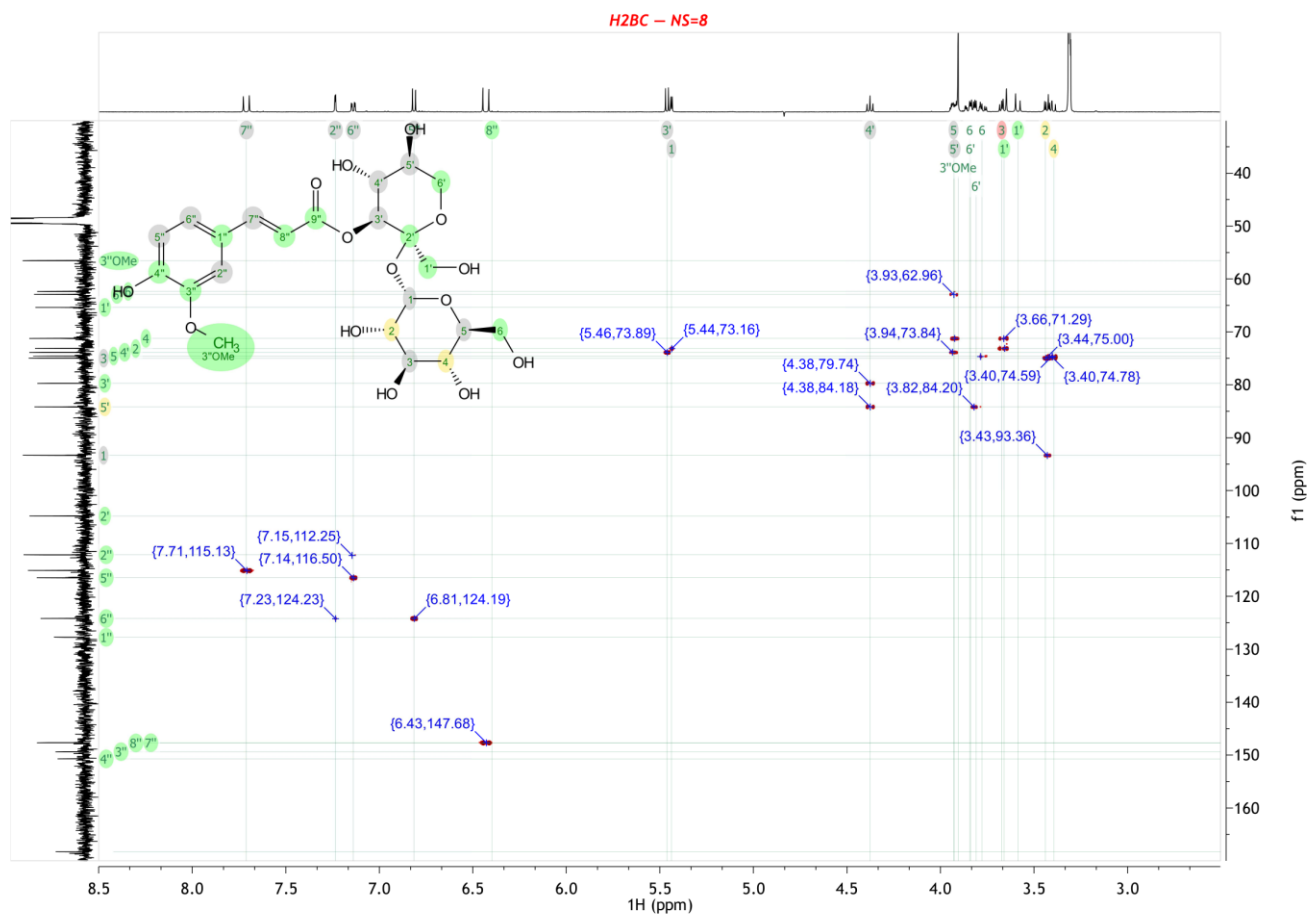

Figure 20S.  $^1\text{H}$ - $^{13}\text{C}$  H2BC NMR spectrum of compound 10

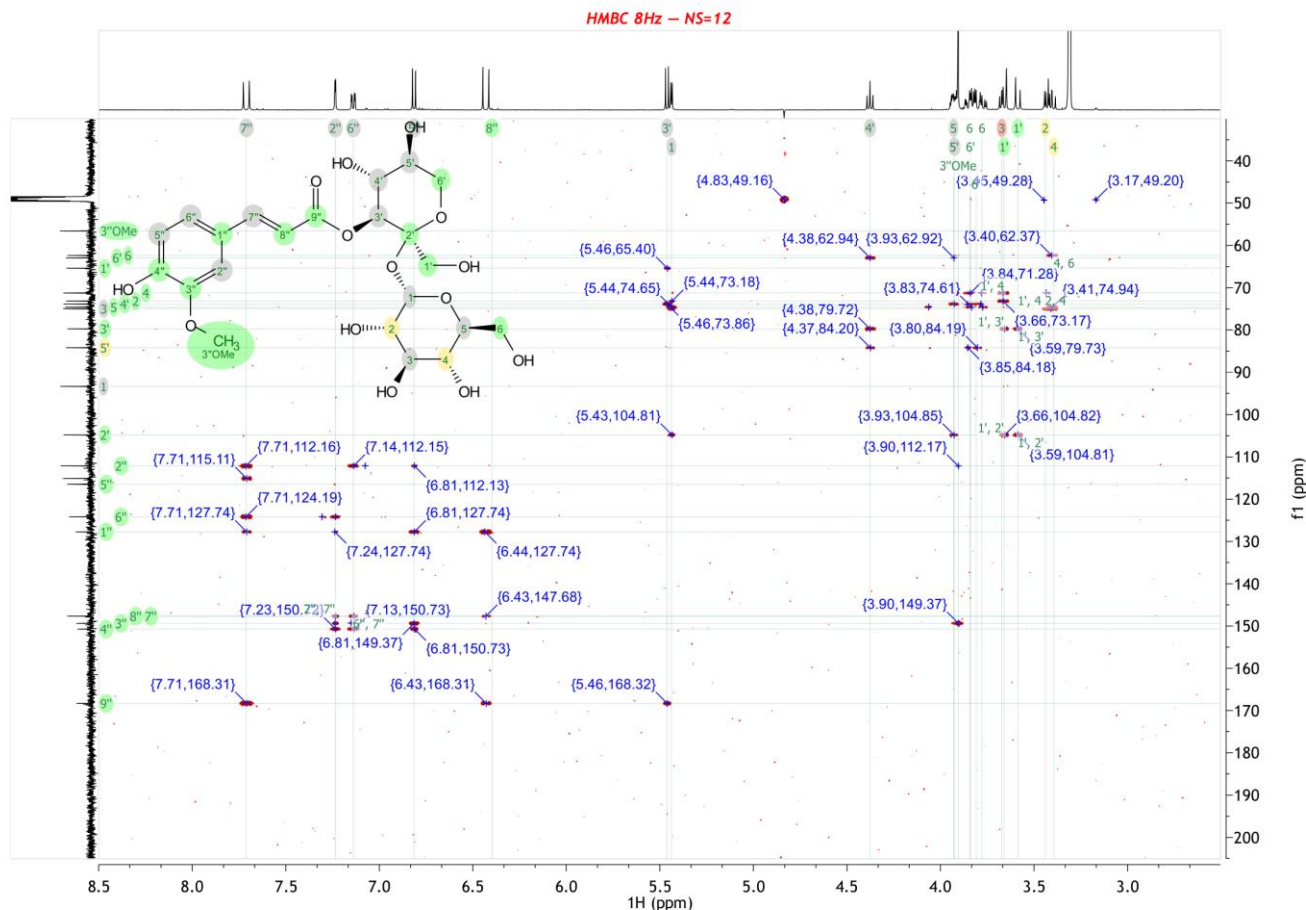

Figure 21S.  $^1\text{H}$ - $^{13}\text{C}$  HMBC (8 Hz) NMR spectrum of compound 10

**POAmz267Fr\_II\_p15-28\_flush\_6**  
 Chemical Formula:  $\text{C}_{12}\text{H}_{12}\text{O}_7$   
 Exact Mass: 268.0583  
**KNOWN**

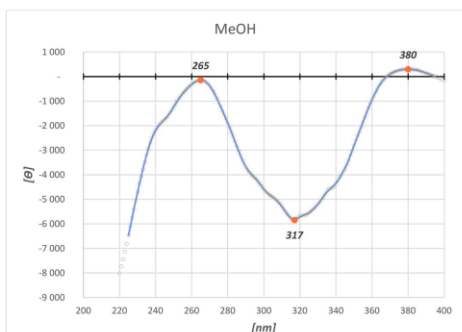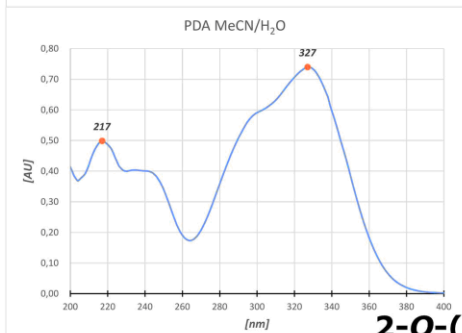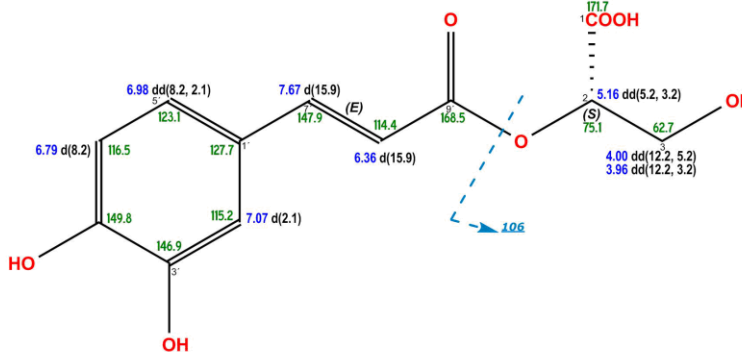

MeOH- $d_4$ , 25°C

| Quat            | CH              |
|-----------------|-----------------|
| 171.7           | 147.9           |
| 168.5           | 123.1           |
| 149.8           | 116.5           |
| 146.9           | 115.2           |
| 127.7           | 114.4           |
|                 | 75.1            |
| CH <sub>2</sub> | CH <sub>3</sub> |
| 62.7            | -               |

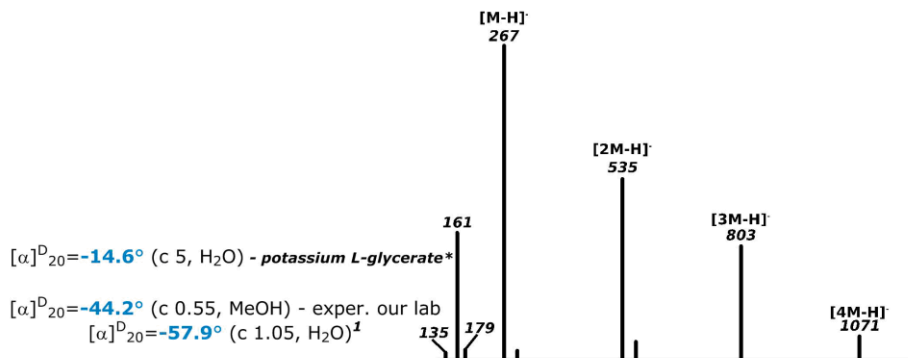

**2-O-(E)-Caffeoyl-L-glyceric acid**

$[\alpha]_{20}^D = -14.6^\circ$  (c 5,  $\text{H}_2\text{O}$ ) - *potassium L-glycerate*\*  
 $[\alpha]_{20}^D = -44.2^\circ$  (c 0.55, MeOH) - exper. our lab  
 $[\alpha]_{20}^D = -57.9^\circ$  (c 1.05,  $\text{H}_2\text{O}$ )<sup>1</sup>

1. Hahn, R., Nahrstedt, A., 1993. Hydroxycinnamic acid derivatives, caffeoylmalic and new caffeoylaldonic acid esters, from *Chelidonium majus*. *Planta Med.* 59, 71-75. doi:10.1055/s-2006-959608  
 \* <http://www.drugfuture.com/chemdata/glyceric-acid.html>

Figure 22S.  $^1\text{H}$  (500 MHz) and  $^{13}\text{C}$  (125 MHz) NMR data of compound 11 in  $\text{CD}_3\text{OD}$ , 25°C; on-line PDA UV spectrum in MeCN/ $\text{H}_2\text{O}$ ; ECD spectrum in MeOH



**POAmz297Fr\_II\_p19-34\_flash\_2-p23**

Chemical Formula:  $C_{13}H_{14}O_8$   
Exact Mass: 298,0689

**KNOWN**

MeOH- $d_4$ , 25°C

| Quat                  | CH    |
|-----------------------|-------|
| 175.9                 | 147.2 |
| 169.0                 | 123.0 |
| 149.6                 | 116.5 |
| 146.8                 | 115.2 |
| 127.7                 | 114.8 |
|                       | 72.3  |
| <b>CH<sub>2</sub></b> | 71.4  |
| 66.0                  |       |

**CH<sub>3</sub>**  
-

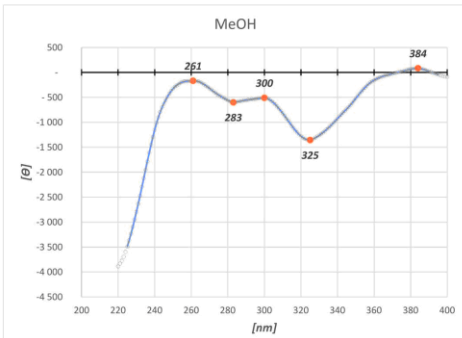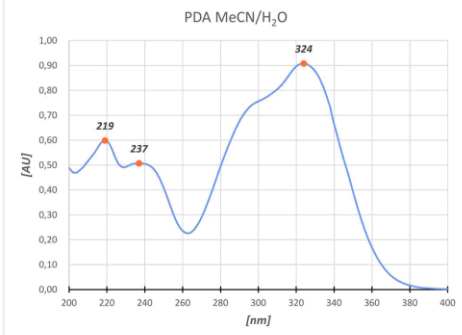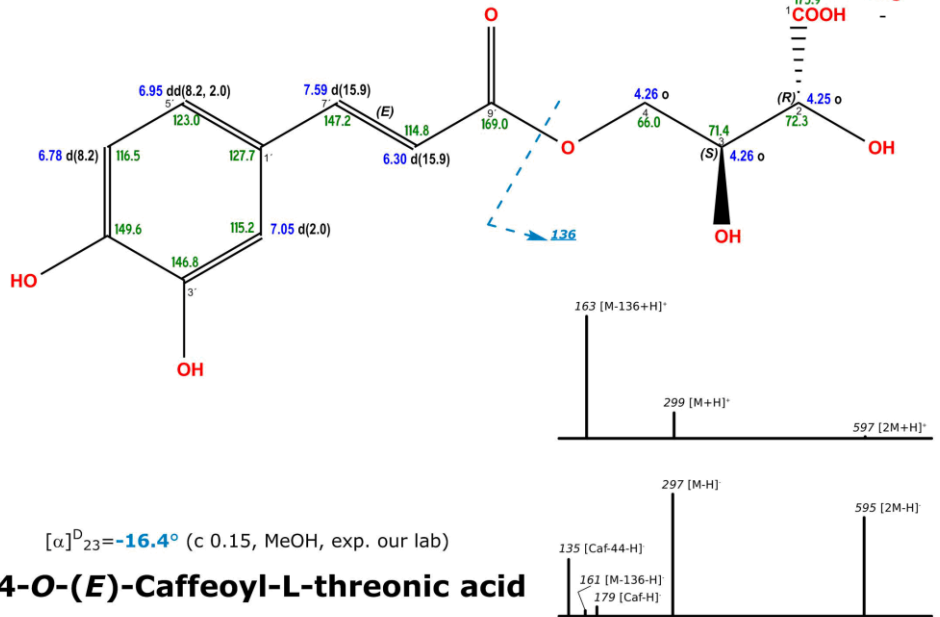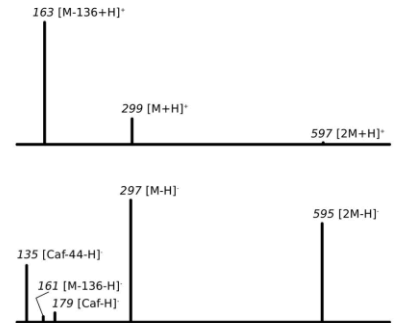

Hahn, R., Nahrstedt, A., 1993. Hydroxycinnamic acid derivatives, caffeoylmalic and new caffeoylalonic acid esters, from *Chelidonium majus*. *Planta Med.* 59, 71–75. doi:10.1055/s-2006-959608

**Figure 23S.**  $^1H$  (500 MHz) and  $^{13}C$  (125 MHz) NMR data of compound 12 in  $CD_3OD$ , 25°C; on-line PDA UV spectrum in MeCN/ $H_2O$ ; ECD spectrum in MeOH

**POAmz267Fr\_II\_p19-33\_2-3-1**

Chemical Formula:  $C_{12}H_{12}O_7$   
Exact Mass: 268,0583

**NEW!**

MeOH- $d_4$ , 25°C

| Quat                  | CH    |
|-----------------------|-------|
| 174.8                 | 147.4 |
| 168.9                 | 123.0 |
| 149.7                 | 116.5 |
| 146.8                 | 115.1 |
| 127.7                 | 114.6 |
|                       | 70.3  |
| <b>CH<sub>2</sub></b> | 66.9  |
| 66.9                  |       |

**CH<sub>3</sub>**  
-

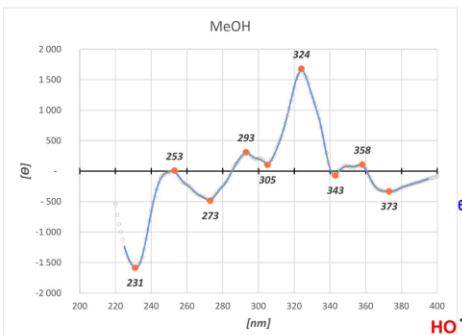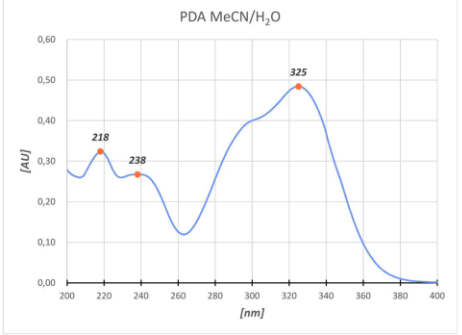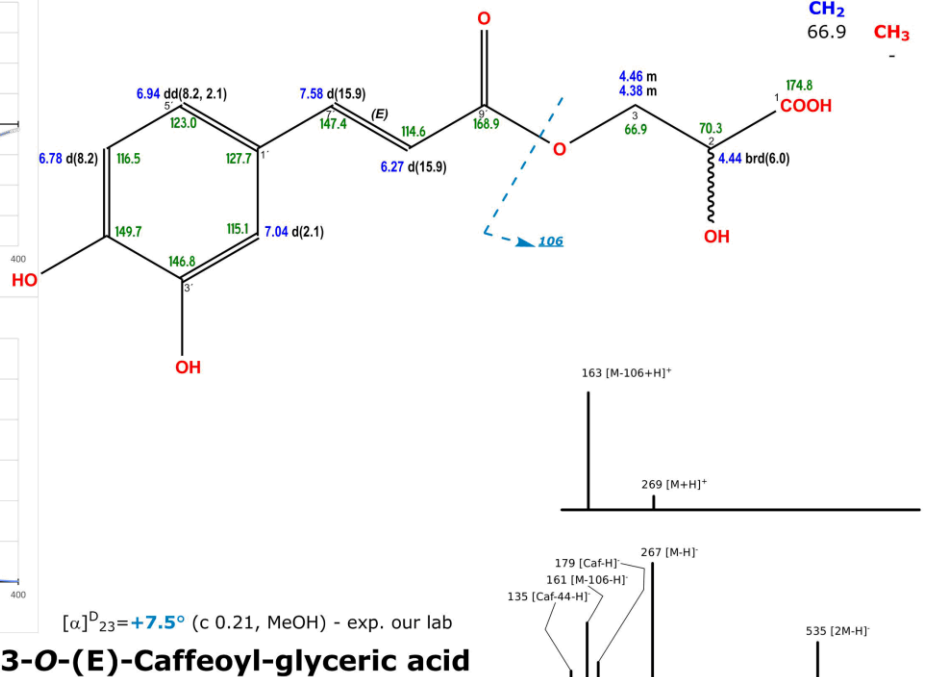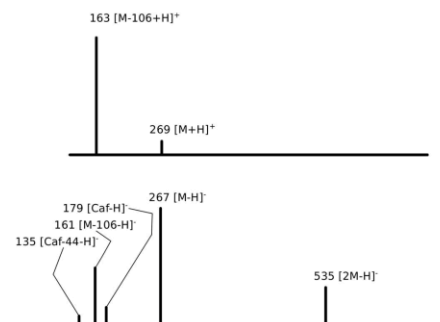

**Figure 24S.**  $^1H$  (500 MHz) and  $^{13}C$  (125 MHz) NMR data of compound 14 in  $CD_3OD$ , 25°C; on-line PDA UV spectrum in MeCN/ $H_2O$ ; ECD spectrum in MeOH

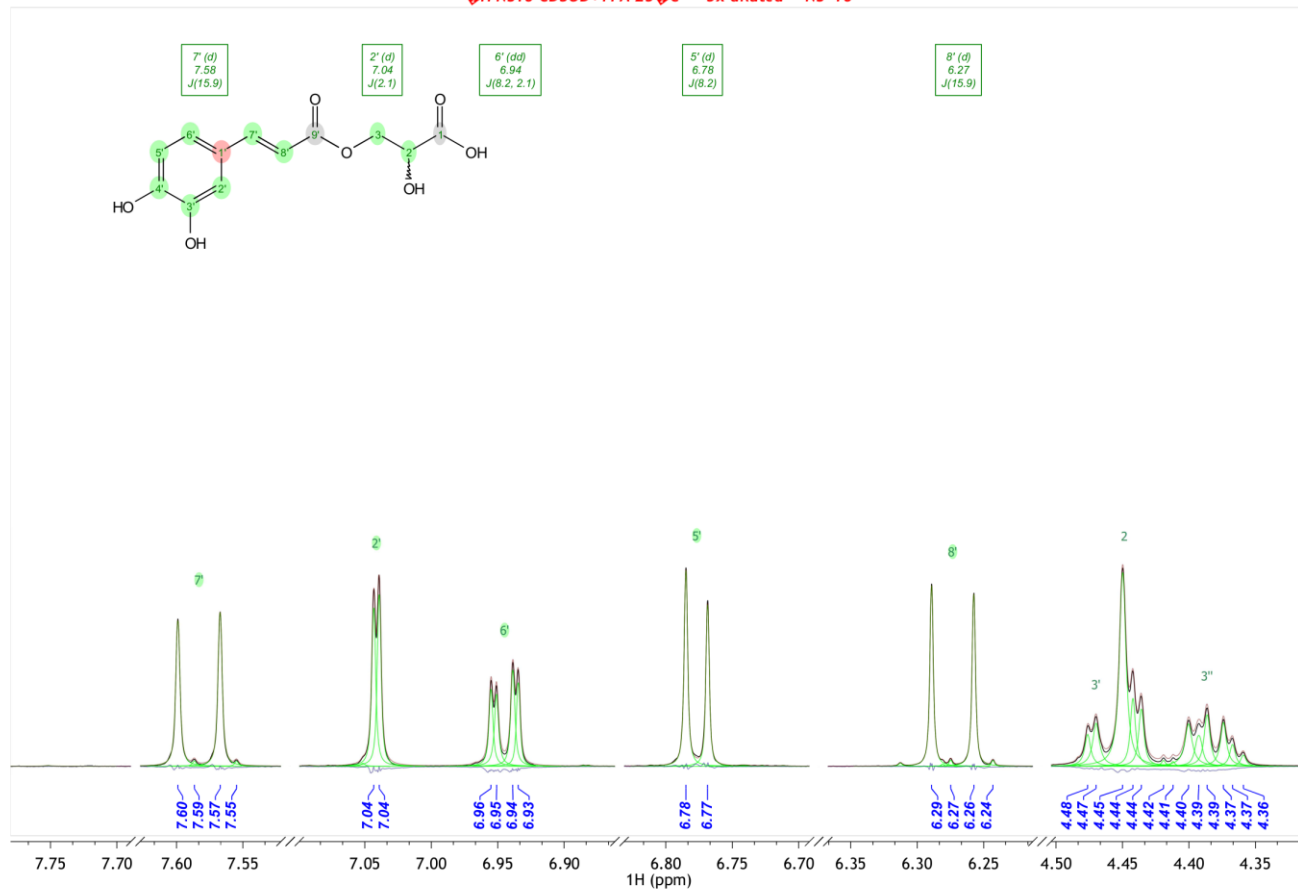

Figure 25S.  $^1\text{H}$  NMR spectrum of compound 14

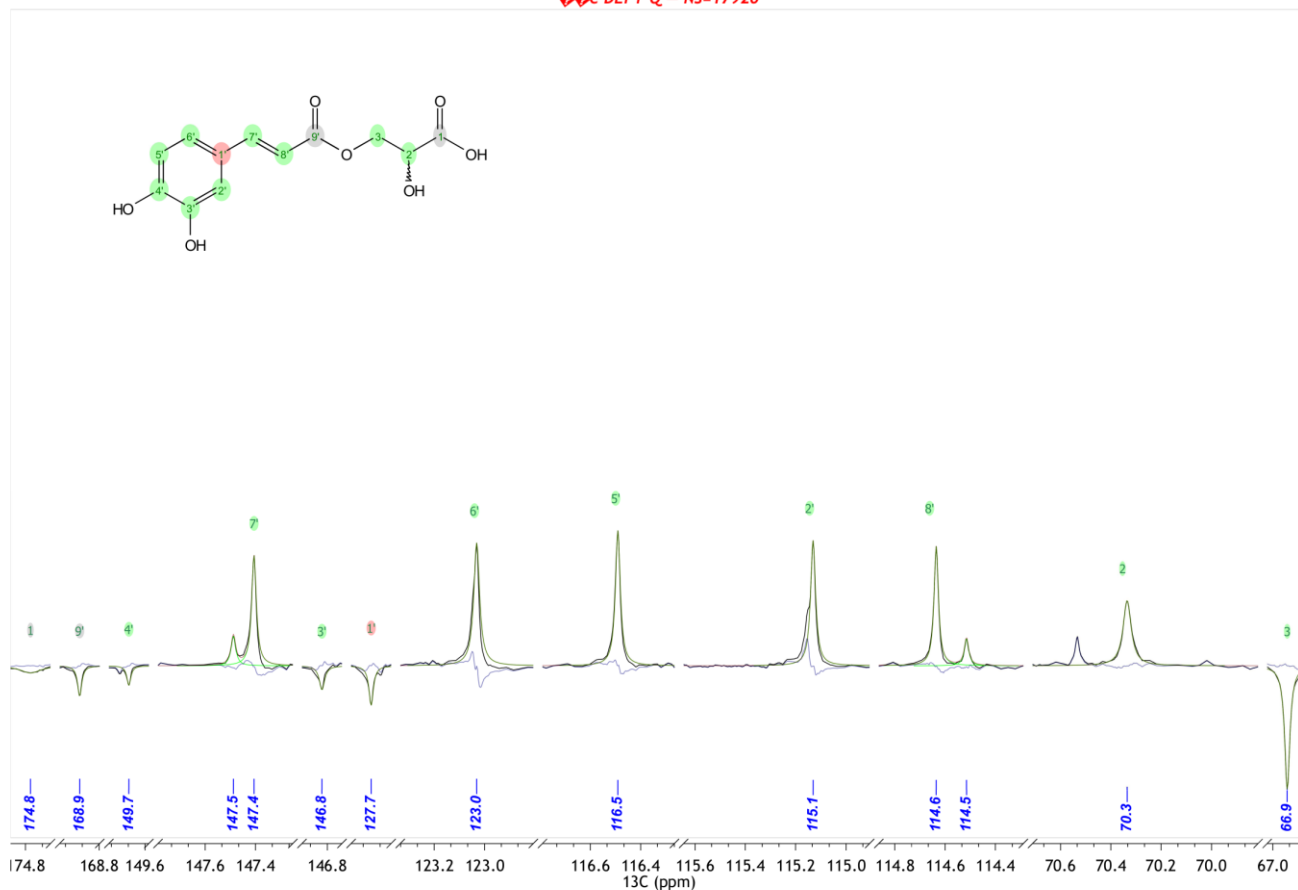

Figure 26S.  $^{13}\text{C}$  DEPTQ NMR spectrum of compound 14

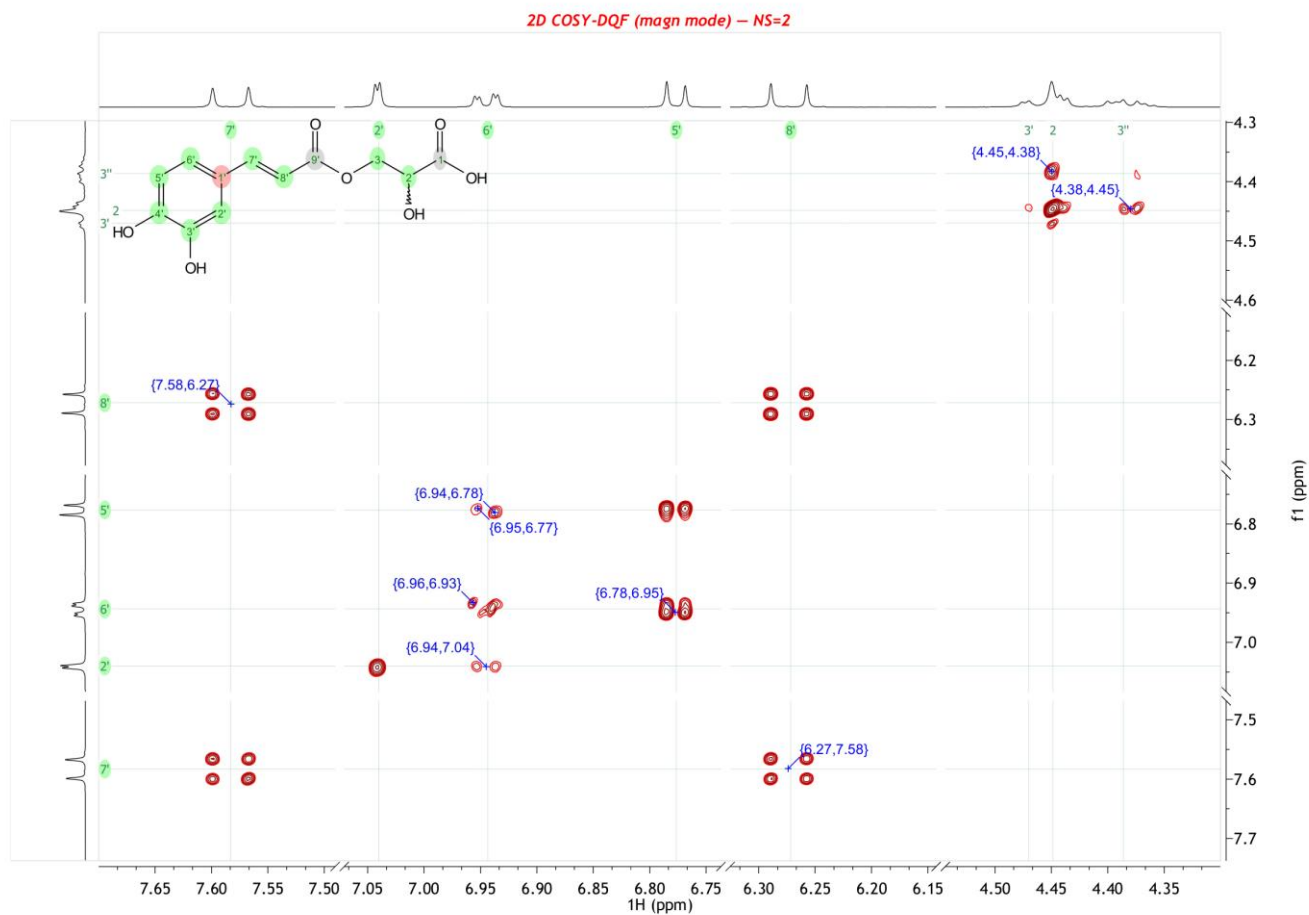

**Figure 27S.**  $^1\text{H}$ - $^1\text{H}$  COSY NMR spectrum of compound 14

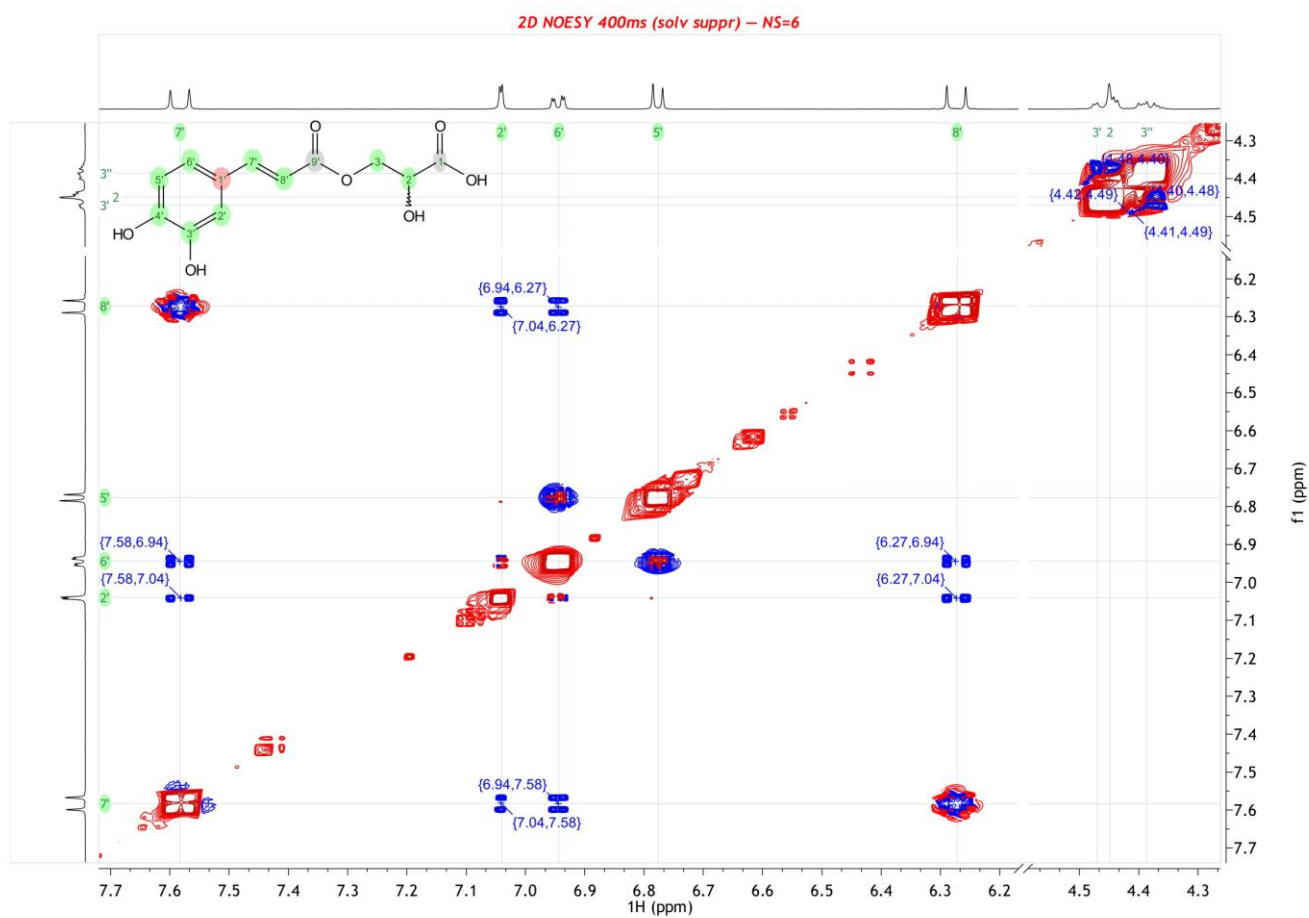

**Figure 28S.**  $^1\text{H}$ - $^1\text{H}$  NOESY (400 ms) NMR spectrum of compound 14

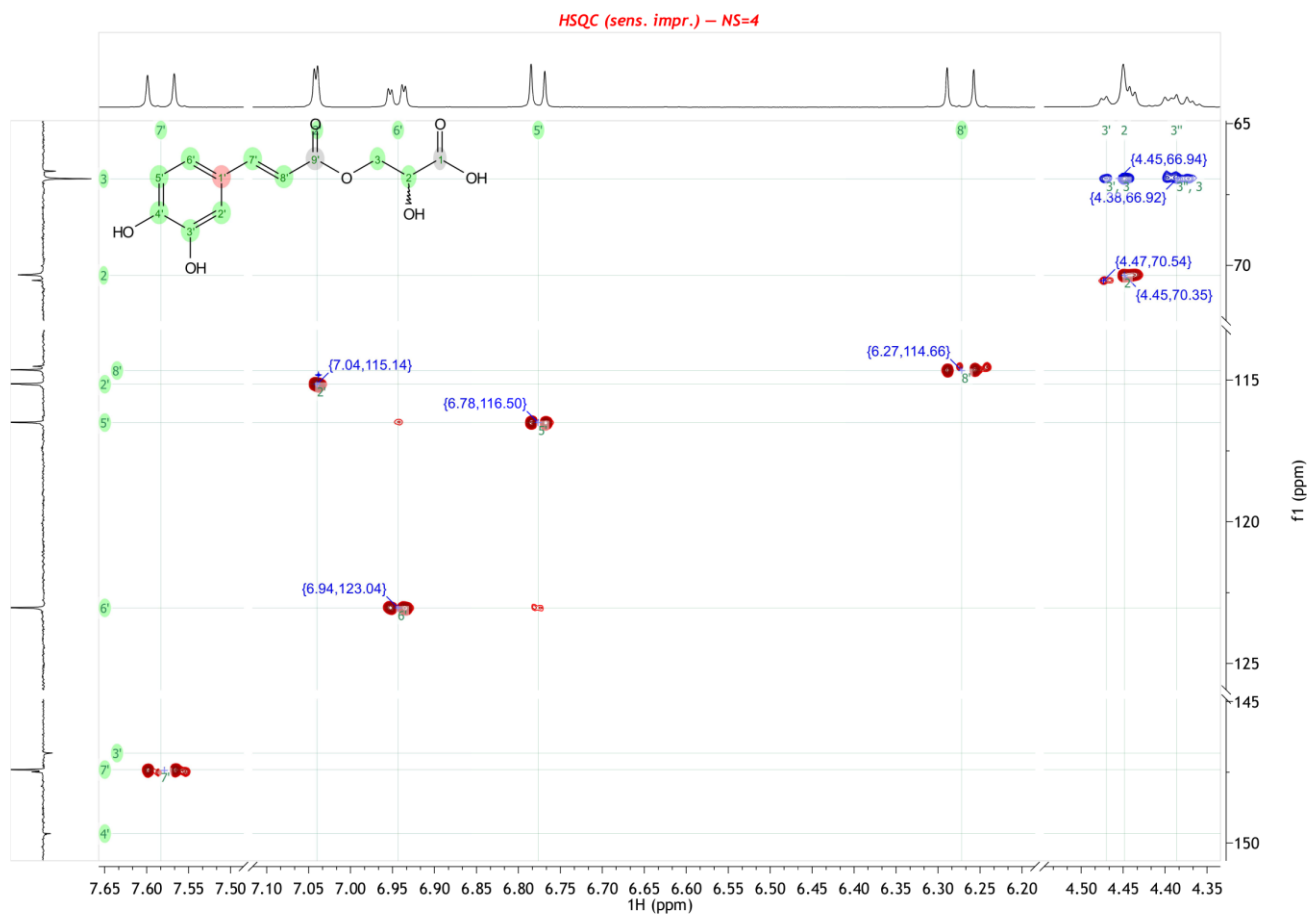

**Figure 29S.**  $^1\text{H}$ - $^{13}\text{C}$  HSQC NMR spectrum of compound 14

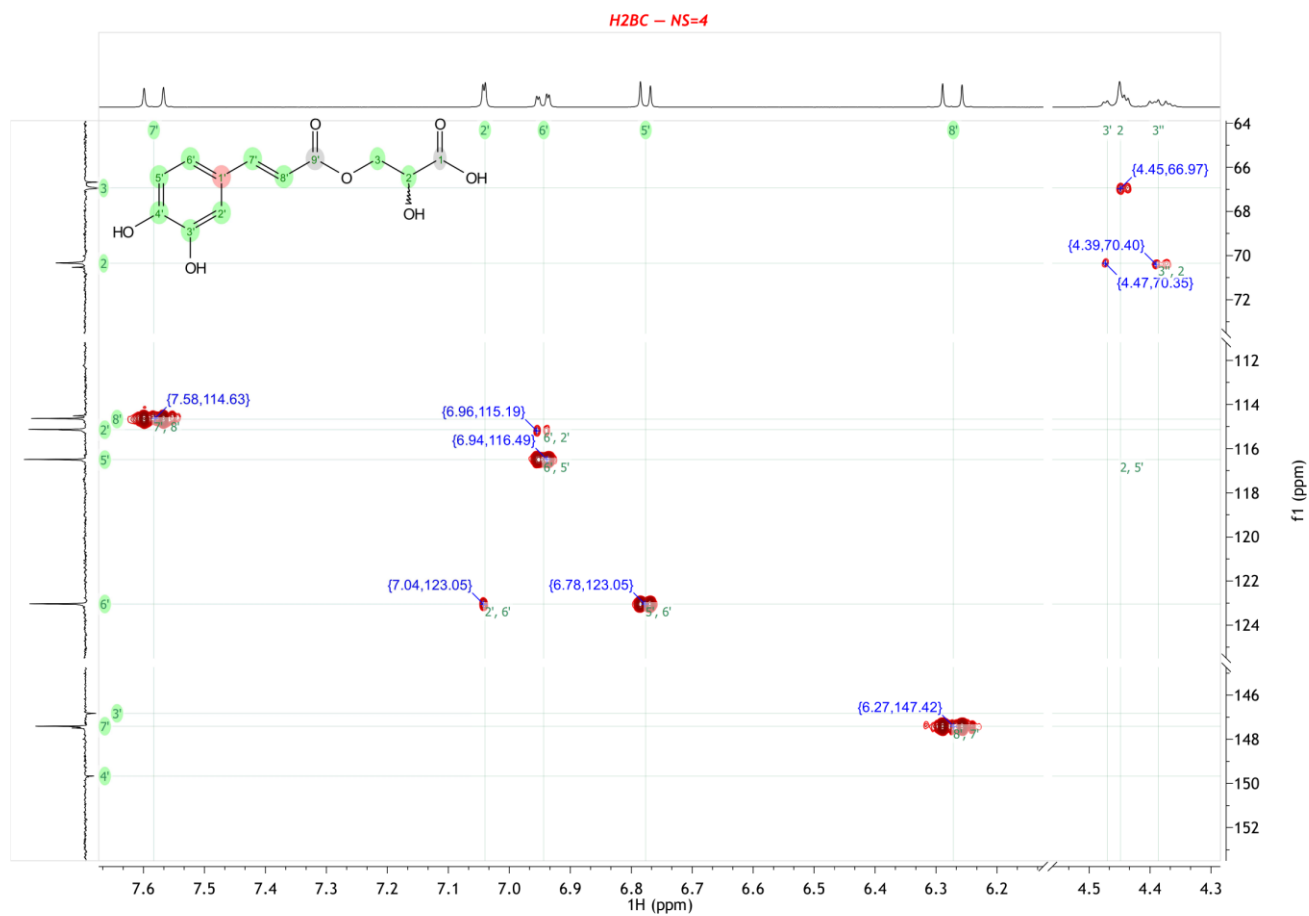

**Figure 30S.**  $^1\text{H}$ - $^{13}\text{C}$  H2BC NMR spectrum of compound 14

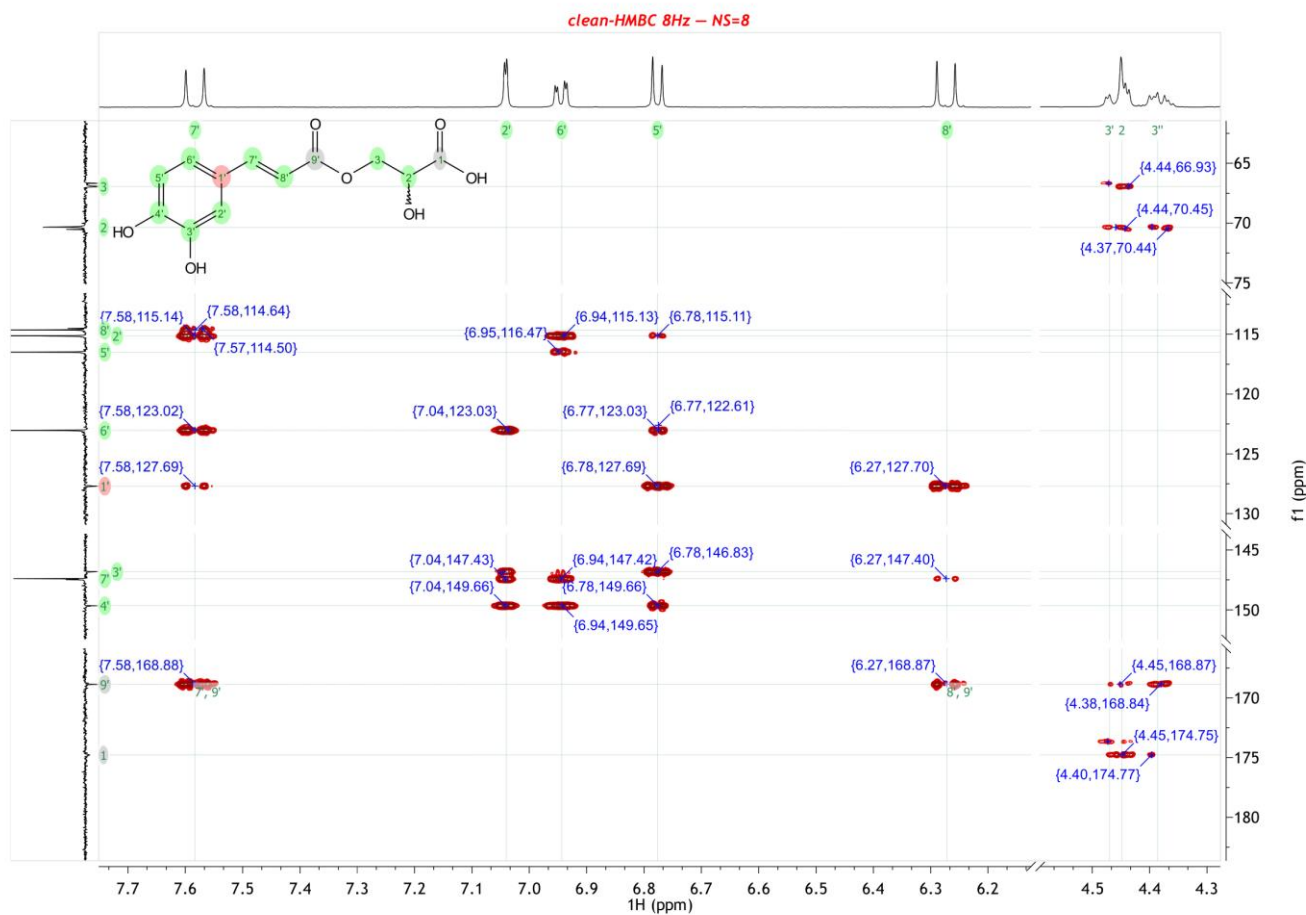

Figure 31S.  $^1\text{H}$ - $^{13}\text{C}$  HMBC (8 Hz) NMR spectrum of compound 14

**POAmz337Fr\_II\_p19-33\_F\_3-2**  
 Chemical Formula:  $\text{C}_{16}\text{H}_{18}\text{O}_8$   
 Molecular Weight: **338.3120**  
**KNOWN**

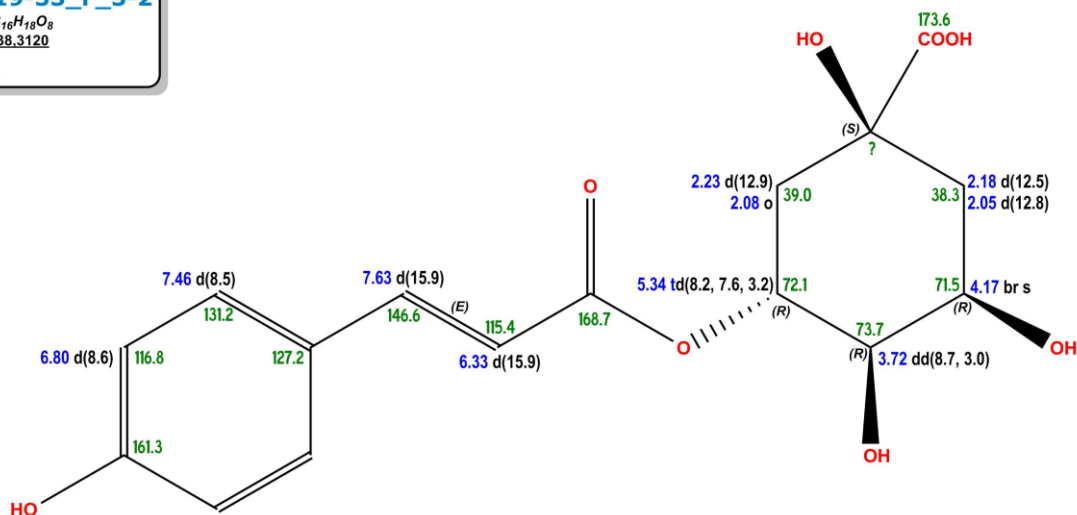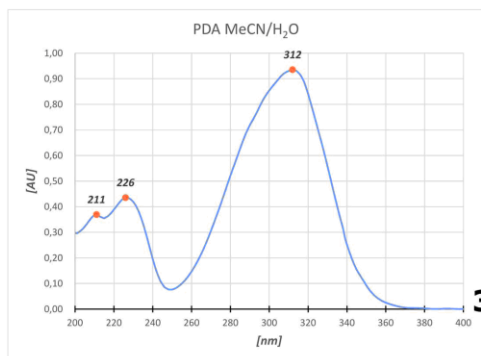

$[\alpha]_{23}^{\text{D}} = -28.5^\circ$  (c 0.23, MeOH, exp. our lab)  
**3-O-p-Coumaroylquinic acid**

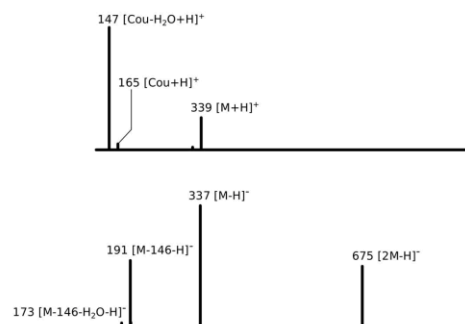

Figure 32S.  $^1\text{H}$  (500 MHz) and  $^{13}\text{C}$  (125 MHz) NMR data of compound 15 in  $\text{CD}_3\text{OD}$ ,  $25^\circ\text{C}$ ; on-line PDA UV spectrum in MeCN/H<sub>2</sub>O

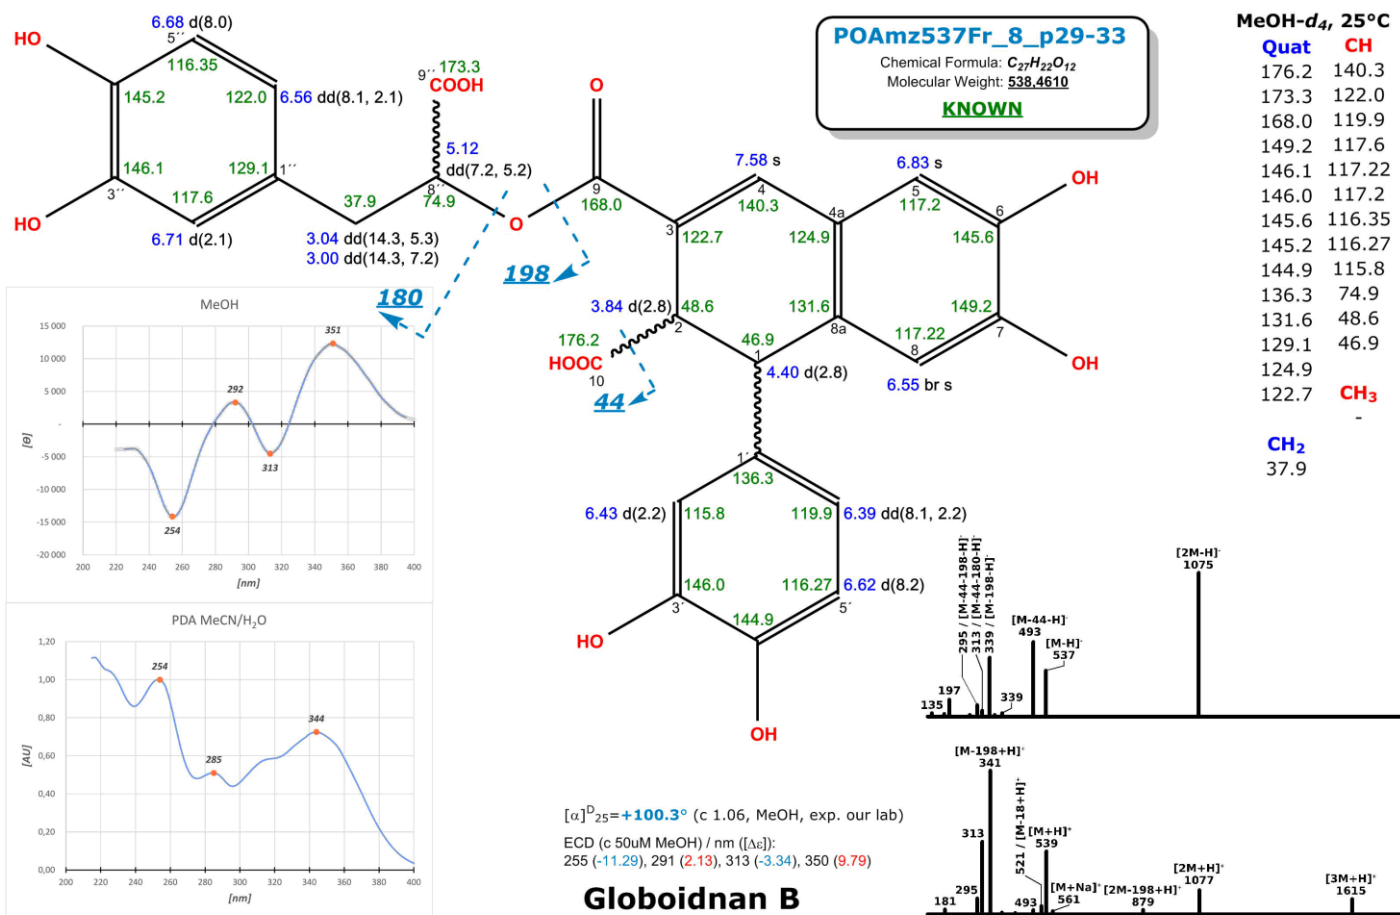

1. Basli, A., Delaunay, J.-C., Pedrot, E., Bernillon, S., Madani, K., Monti, J.-P., Mérlion, J.M., Chibane, M., Richard, T., 2014. New Cycloignans from *Origanum glandulosum* Active Against  $\beta$ -amyloid Aggregation. *Rec. Nat. Prod.* 8, 208–216.  
 2. Assoumatine, T., Datta, P.K., Hooper, T.S., Yvon, B.L., Charlton, J.L., 2004. A Short Asymmetric Synthesis of (+)-Lyoniresinol Dimethyl Ether. *J. Org. Chem.* 69, 4140–4144. doi:10.1021/jo0497454

**Figure 33S.**  $^1\text{H}$  (500 MHz) and  $^{13}\text{C}$  (125 MHz) NMR data of compound 18 in  $\text{CD}_3\text{OD}$ , 25°C; on-line PDA UV spectrum in MeCN/ $\text{H}_2\text{O}$ ; ECD spectrum in MeOH

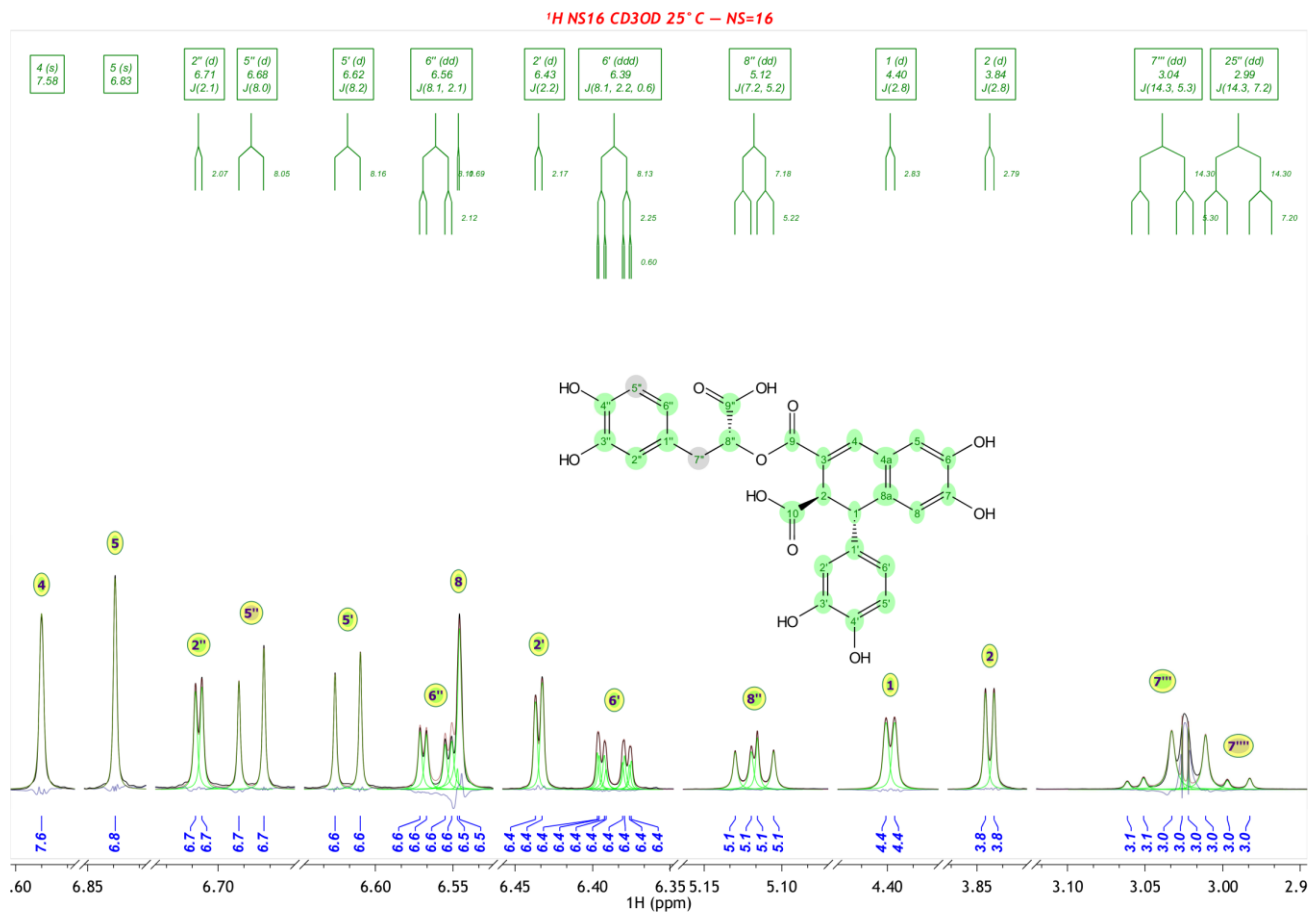

**Figure 34S.**  $^1\text{H}$  NMR spectrum of compound 18

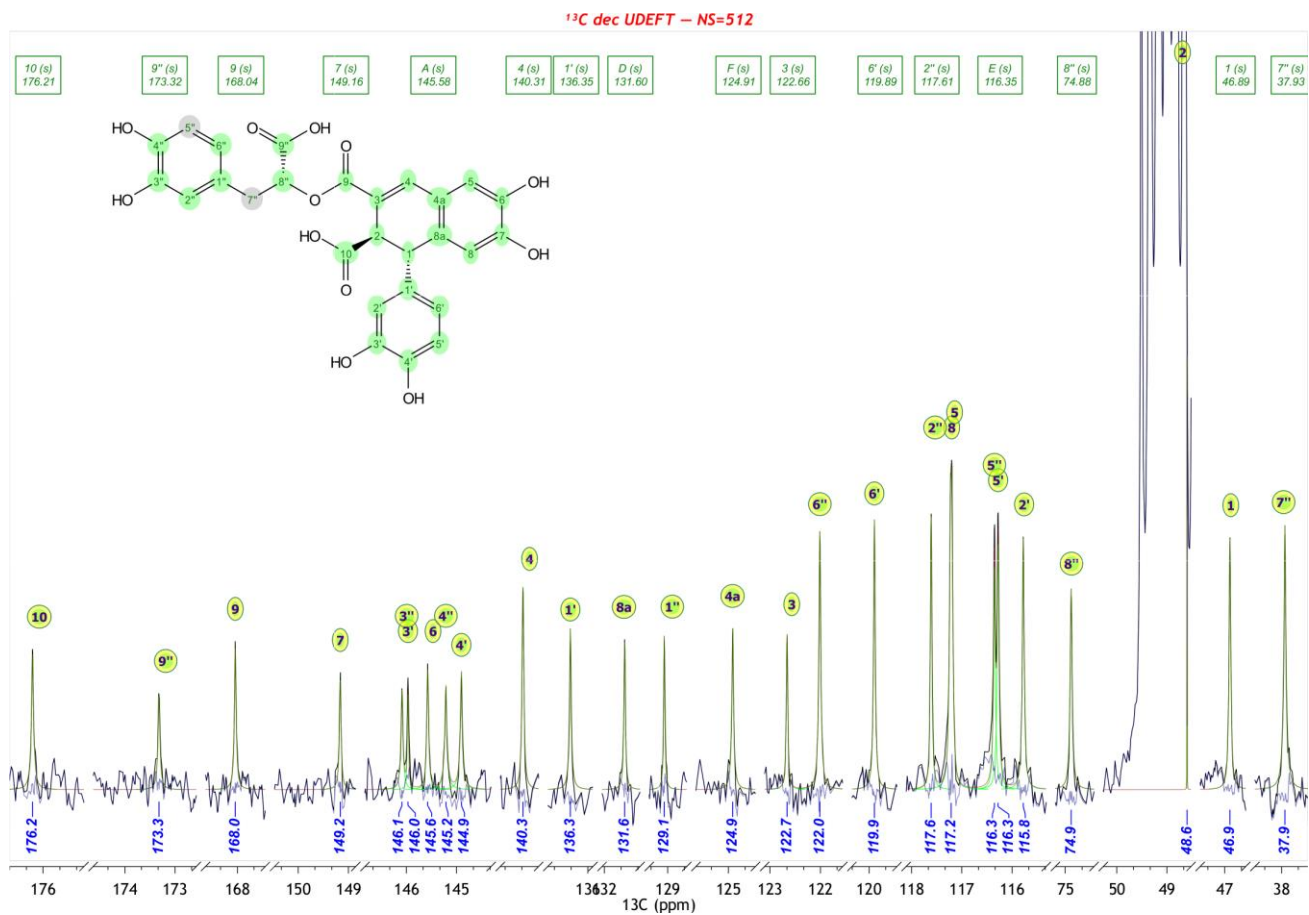

**Figure 35S.** <sup>13</sup>C DEPTQ NMR spectrum of compound 18

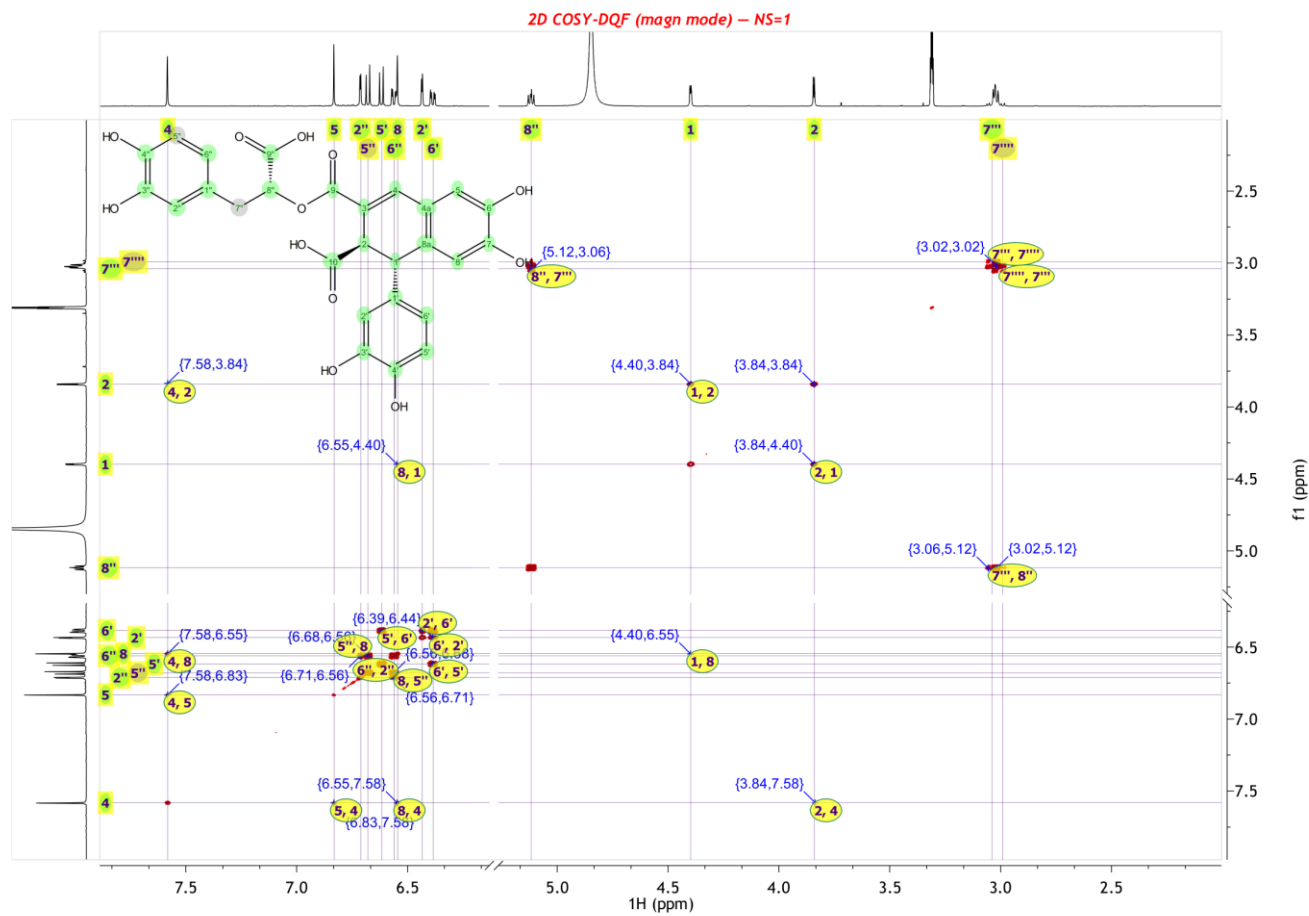

**Figure 36S.** <sup>1</sup>H-<sup>1</sup>H COSY NMR spectrum of compound 18

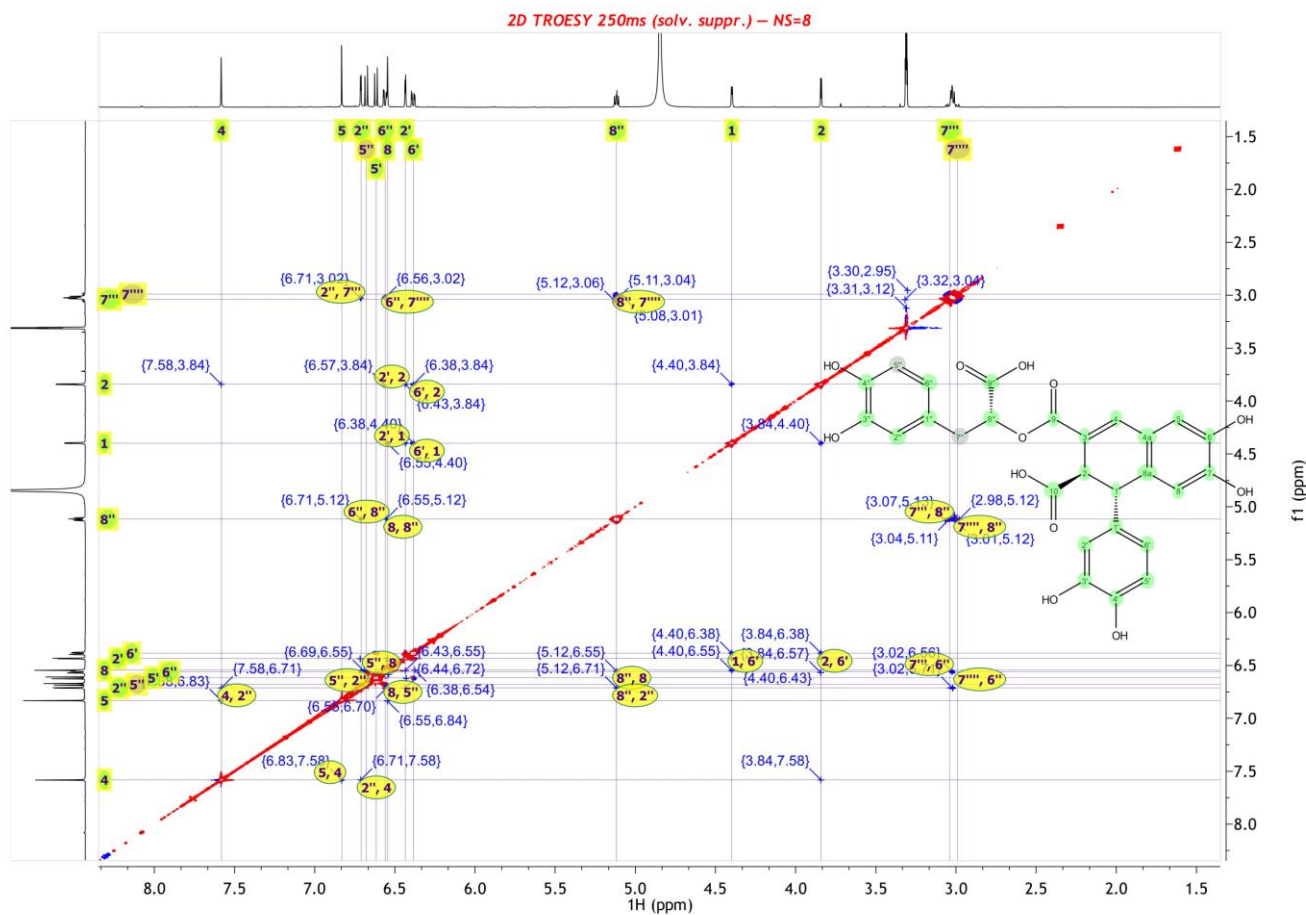

**Figure 37S.**  $^1\text{H}$ - $^1\text{H}$  TROESY (250 ms) NMR spectrum of compound 18

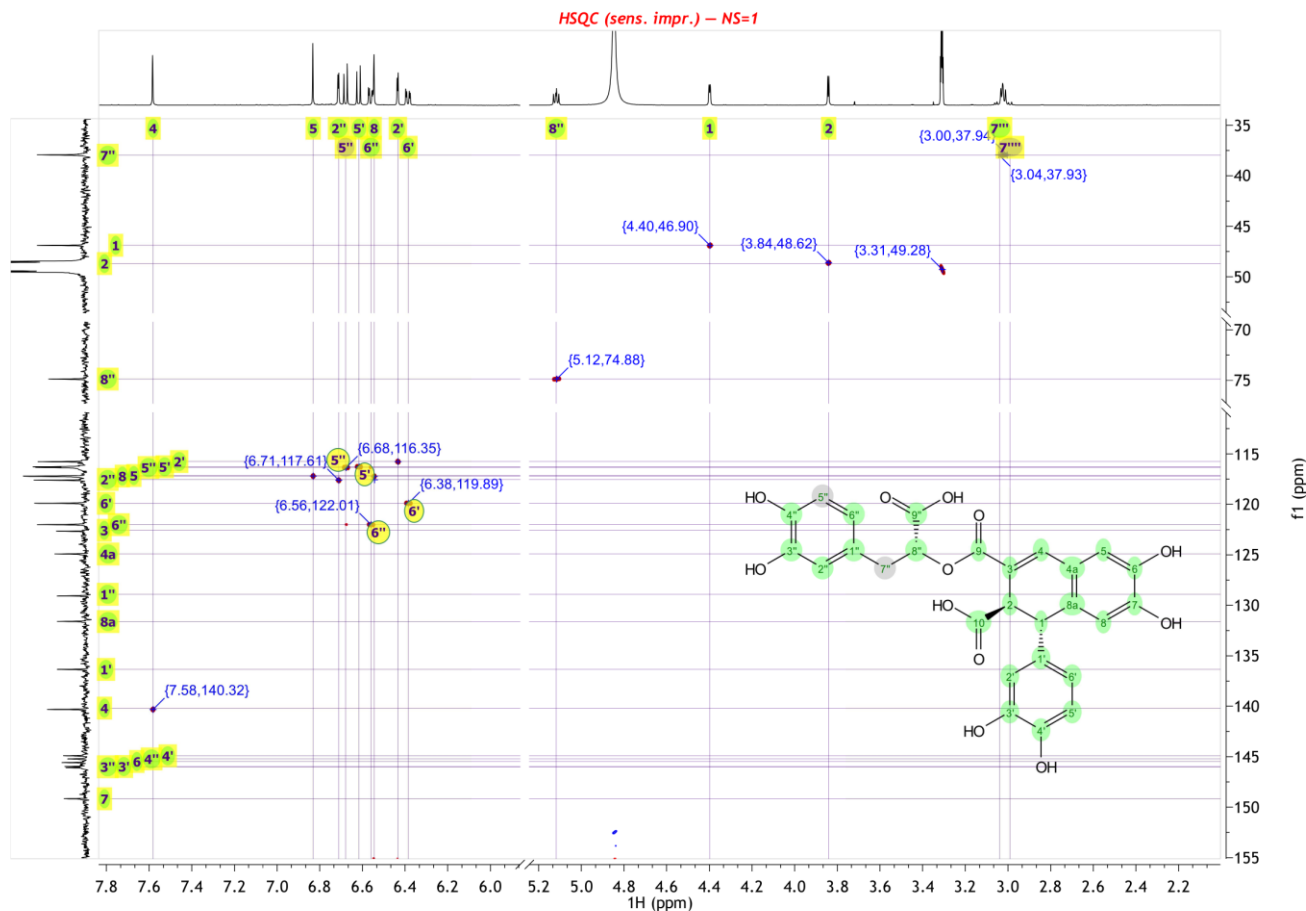

**Figure 38S.**  $^1\text{H}$ - $^{13}\text{C}$  HSQC NMR spectrum of compound 18



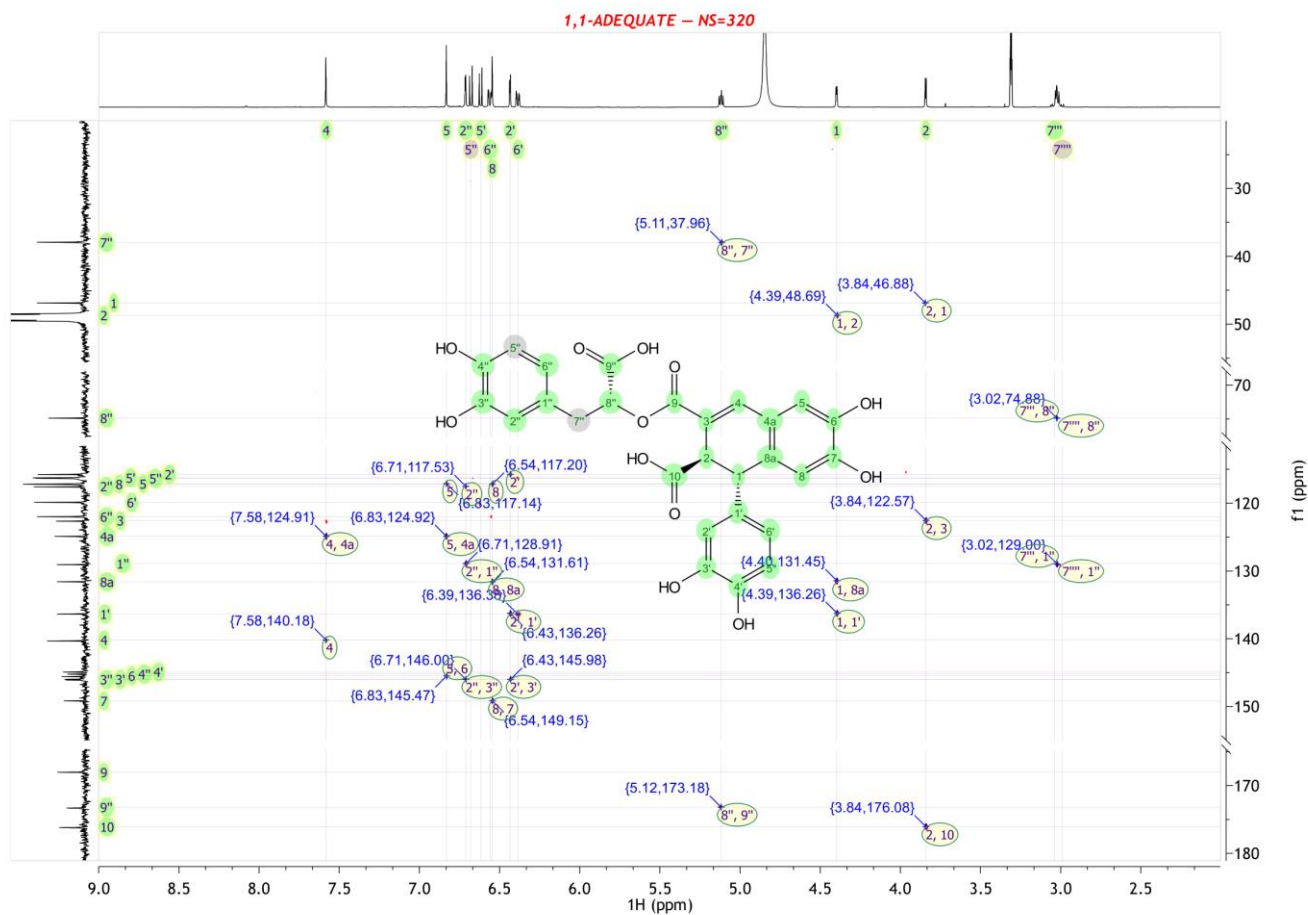

**Figure 39S.**  $^1\text{H}$ - $^{13}\text{C}$  1,1-ADEQUATE NMR spectrum of compound 18

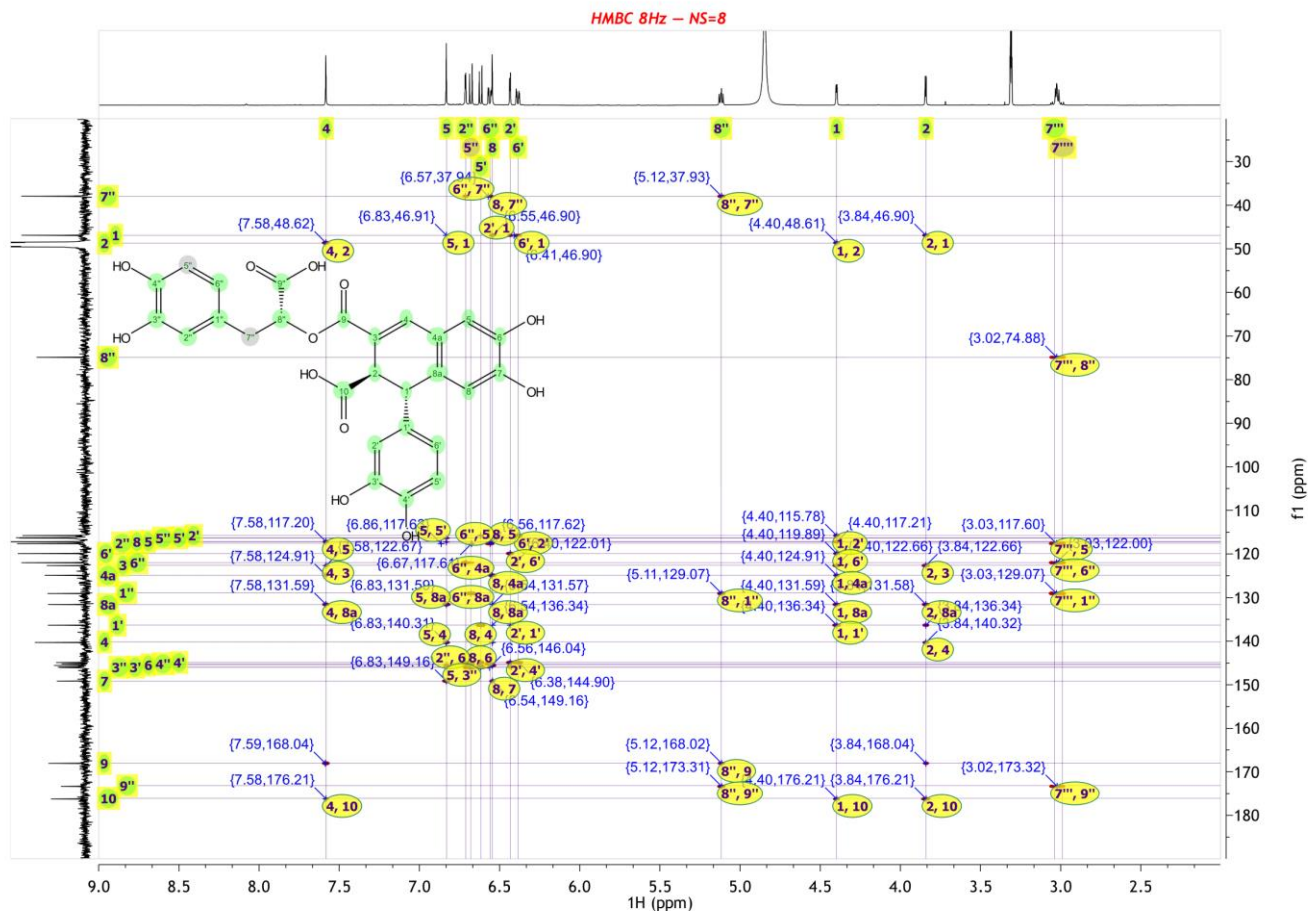

**Figure 40S.**  $^1\text{H}$ - $^{13}\text{C}$  HMBC (8 Hz) NMR spectrum of compound 18

**POAmz609Fr\_VI-VII\_p50-52\_1**

Chemical Formula:  $C_{27}H_{30}O_{16}$   
Molecular Weight: **610.5210**

**KNOWN**

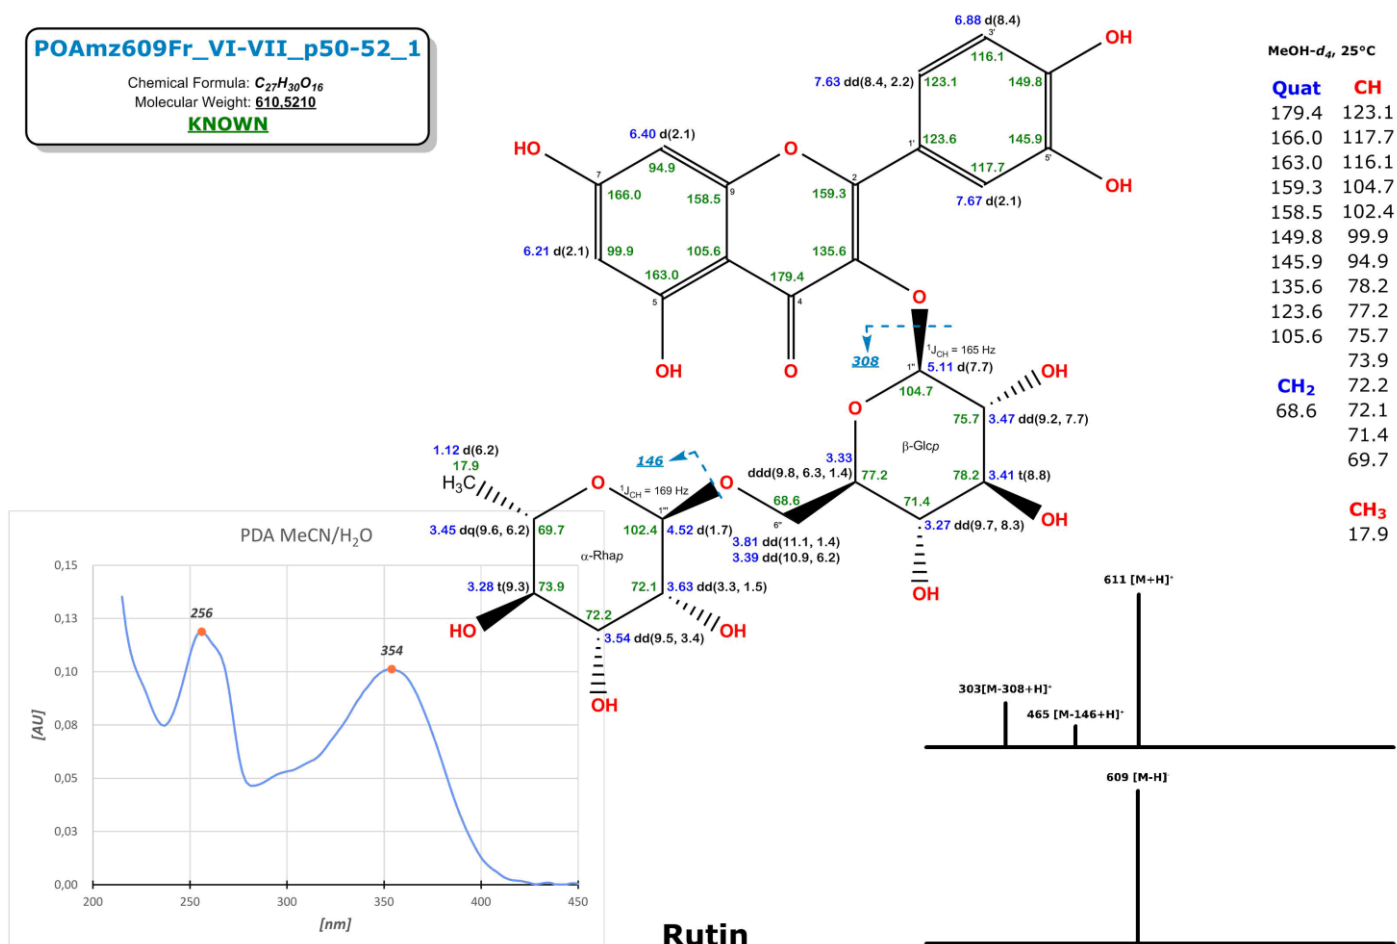

**Rutin**

**Figure 41S.**  $^1\text{H}$  (500 MHz) and  $^{13}\text{C}$  (125 MHz) NMR data of compound 19 in  $\text{CD}_3\text{OD}$ , 25°C; on-line PDA UV spectrum in MeCN/H<sub>2</sub>O

**POAmz463Fr\_VI-VII\_p50-52\_3**

Chemical Formula:  $C_{21}H_{20}O_{12}$   
Molecular Weight: **464.3790**

**KNOWN**

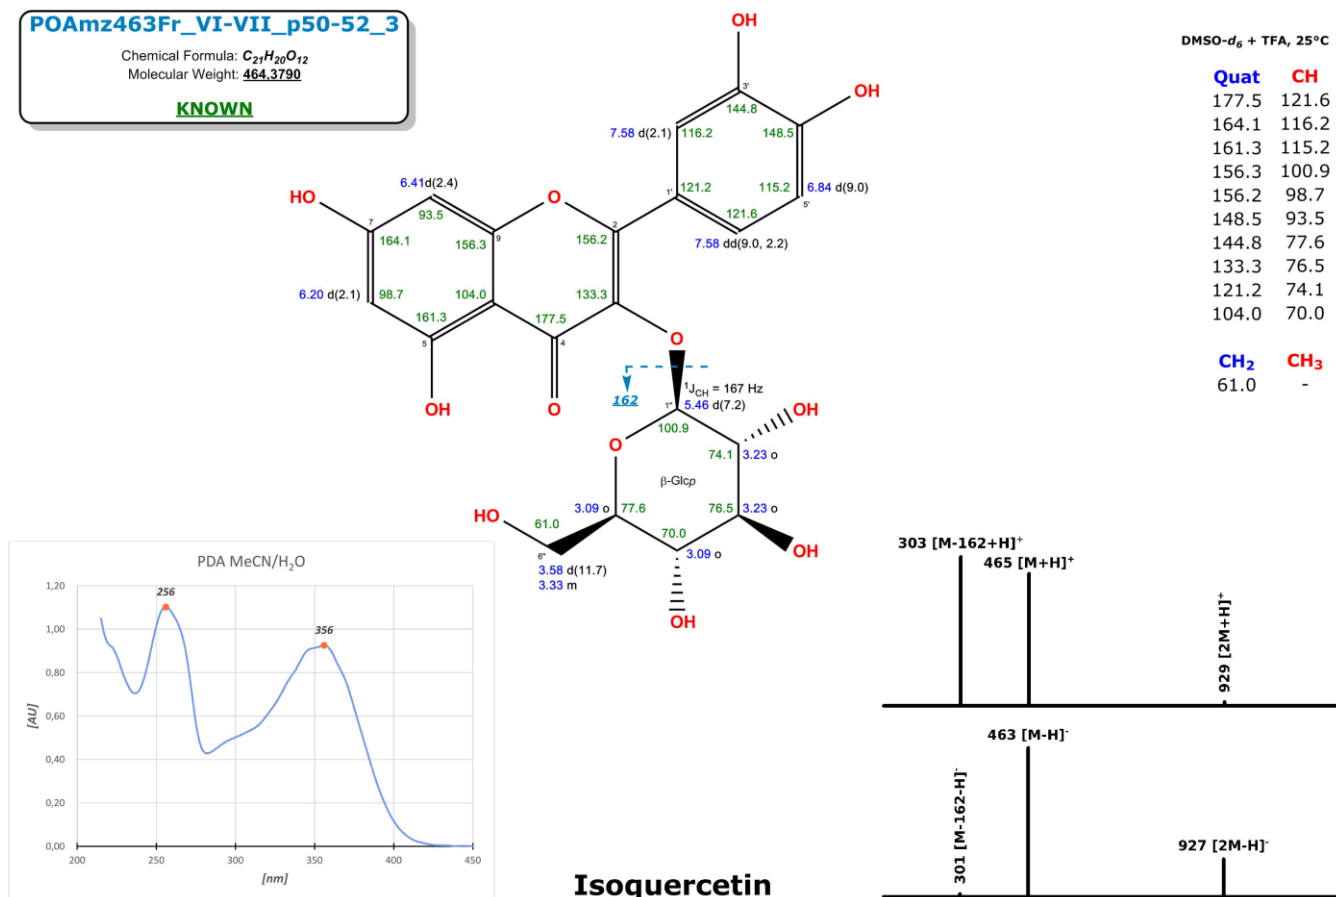

**Isoquercetin**

**Figure 42S.**  $^1\text{H}$  (500 MHz) and  $^{13}\text{C}$  (125 MHz) NMR data of compound 21 in  $\text{CD}_3\text{OD}$ , 25°C; on-line PDA UV spectrum in MeCN/H<sub>2</sub>O

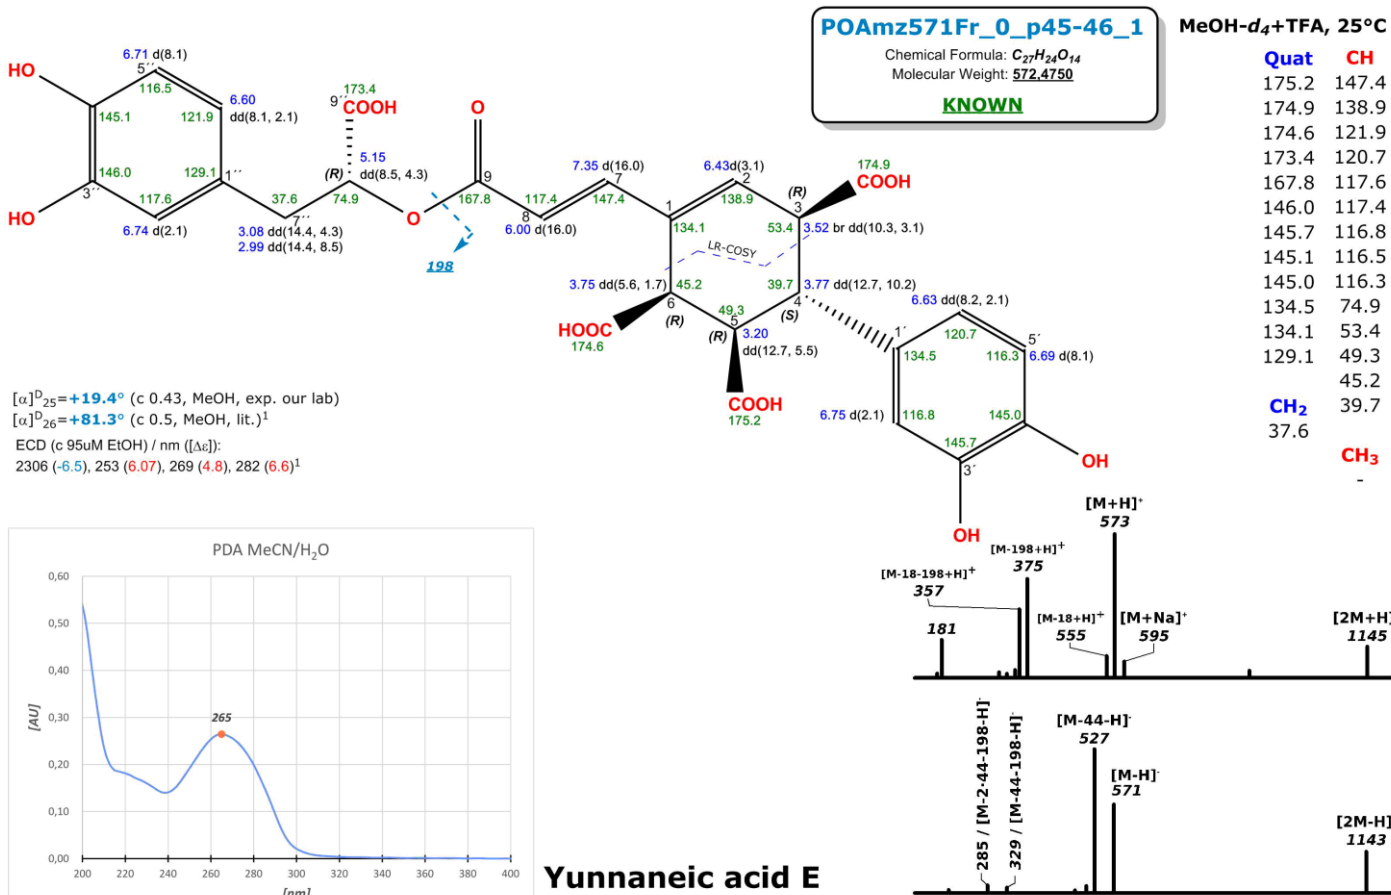

**Figure 43S.**  $^1\text{H}$  (500 MHz) and  $^{13}\text{C}$  (125 MHz) NMR data of compound 22 in  $\text{CD}_3\text{OD}$ , 25°C; on-line PDA UV spectrum in MeCN/ $\text{H}_2\text{O}$

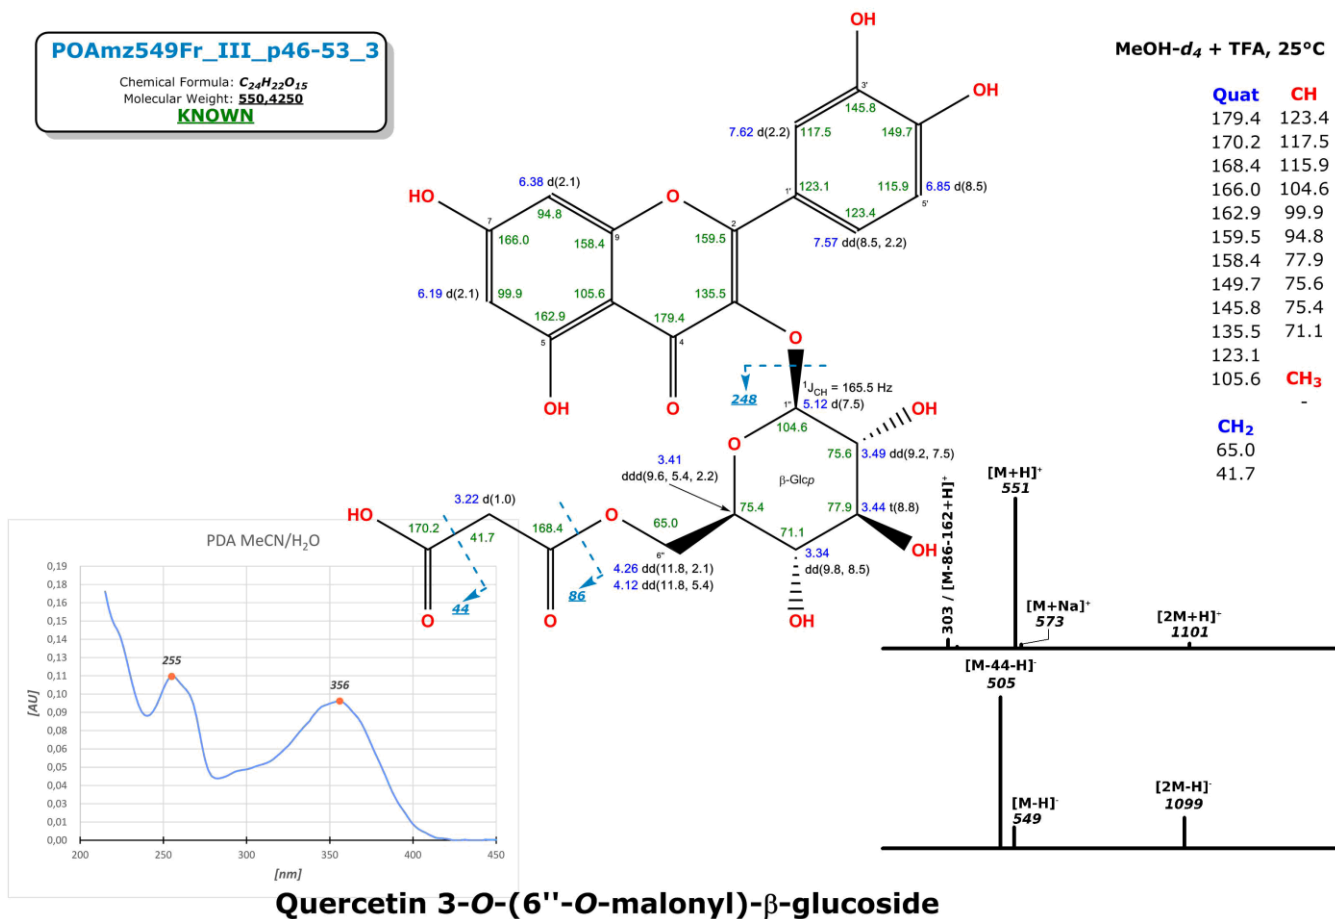

**Figure 44S.**  $^1\text{H}$  (500 MHz) and  $^{13}\text{C}$  (125 MHz) NMR data of compound 23 in  $\text{CD}_3\text{OD}$ , 25°C; on-line PDA UV spectrum in MeCN/ $\text{H}_2\text{O}$



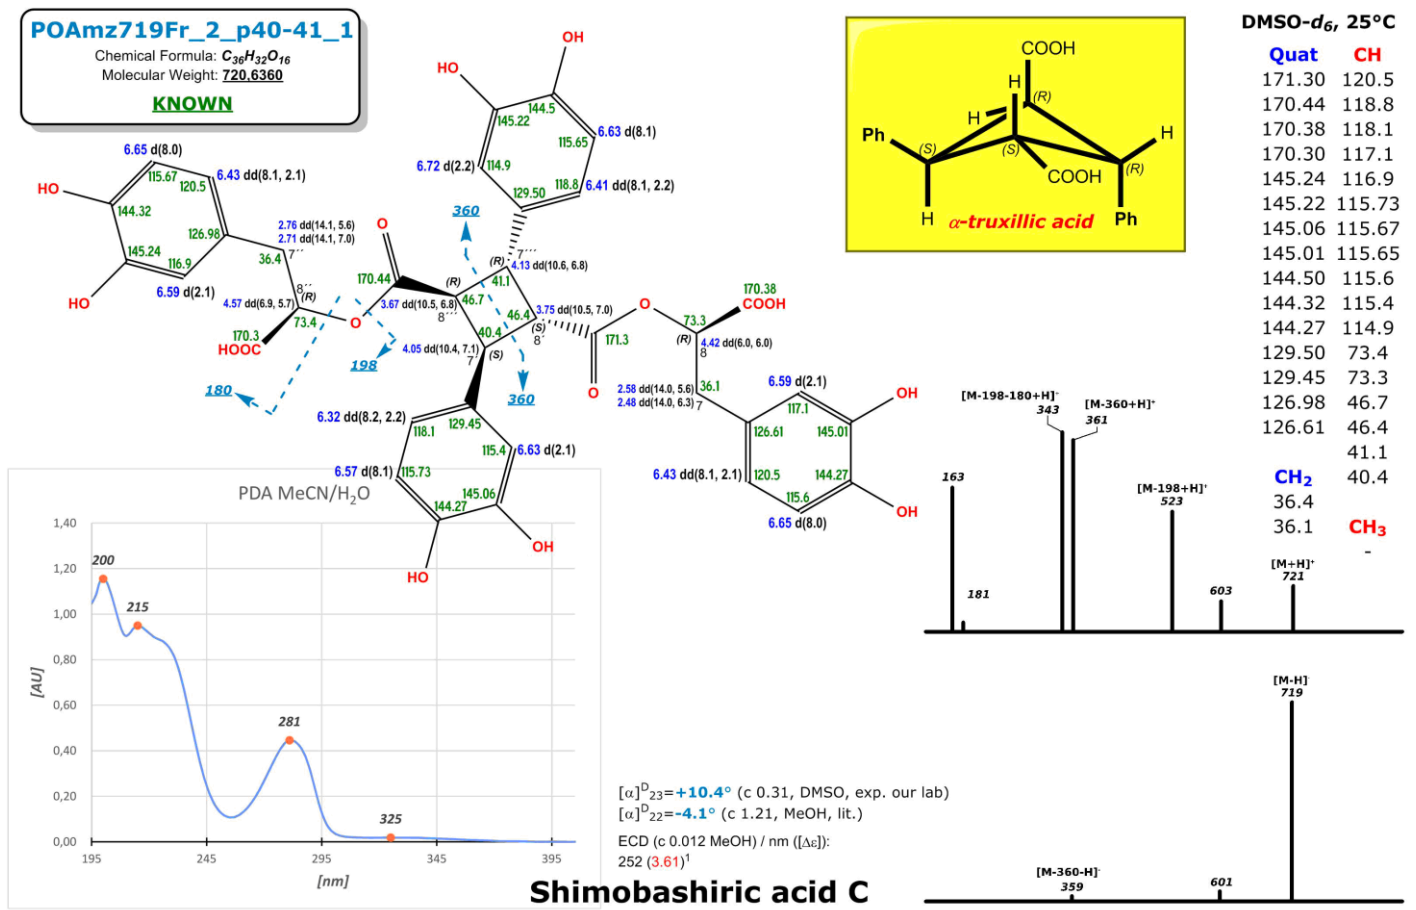

1. Murata, T., Miyase, T., Yoshizaki, F., 2012. Hyaluronidase Inhibitors from Keiskeia japonica. Chem. Pharm. Bull. (Tokyo). 60, 121–128. doi:10.1248/cpb.60.121  
 2. Chen, Y.-S., Yu, H.-M., Shie, J.-J., Cheng, T.-J.R., Wu, C.-Y., Fang, J.-M., Wong, C.-H., 2014. Chemical constituents of Plectranthus amboinicus and the synthetic analogs possessing anti-inflammatory activity. Bioorg. Med. Chem. 22, 1766–1772. doi:10.1016/j.bmc.2014.01.009

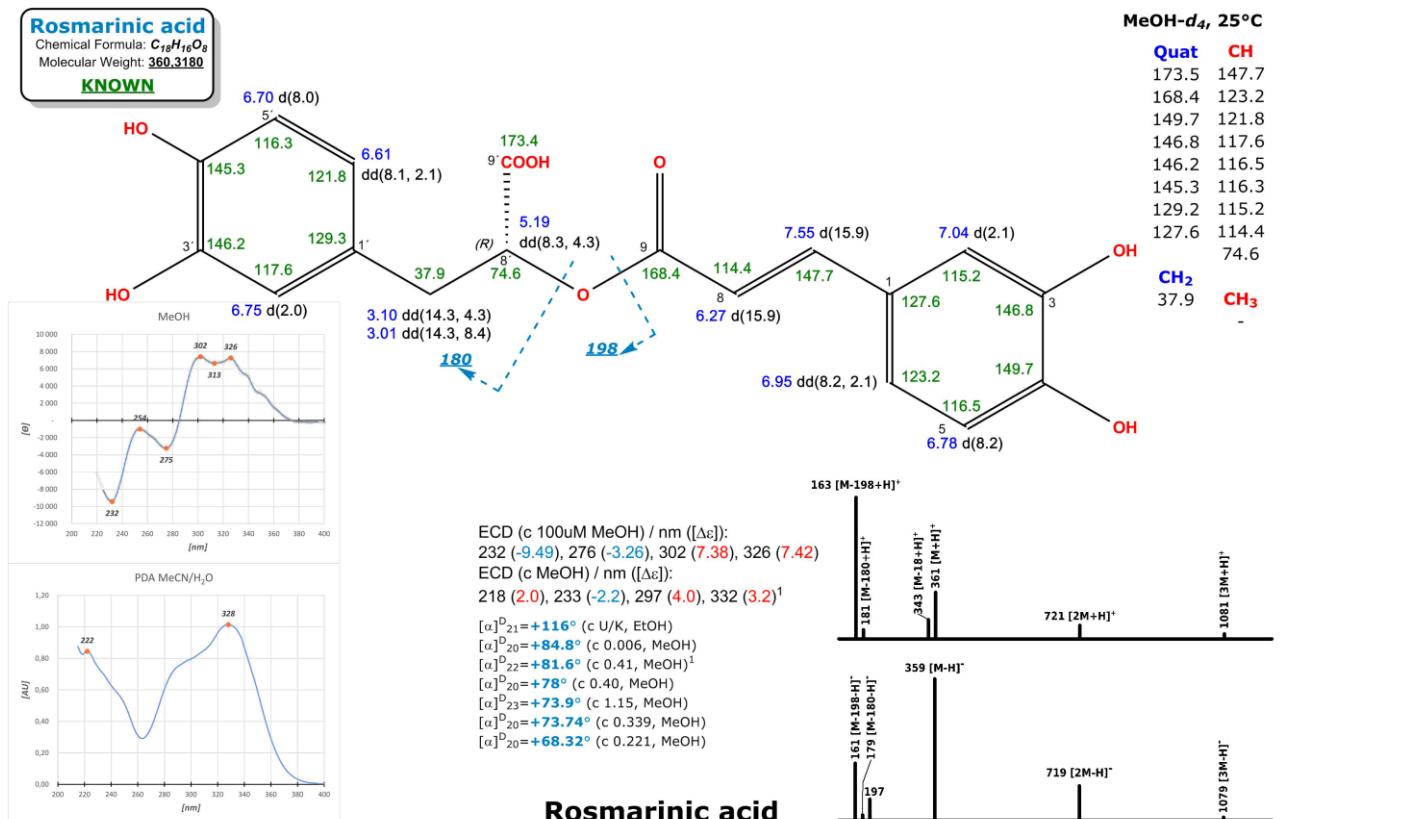

1. Dapkevicius, A., van Beek, T.A., Lelyveld, G.P., van Veldhuizen, A., de Groot, A., Linssen, J.P.H., Venskutonis, R., 2002. Isolation and Structure Elucidation of Radical Scavengers from Thymus vulgaris Leaves. J. Nat. Prod. 65, 892–896. doi:10.1021/np01063j

**POAmz533Fr\_II\_p56-57\_2**

Chemical Formula:  $C_{24}H_{22}O_{14}$   
Molecular Weight: 534.4260

**KNOWN**

MeOH- $d_4$ +TFA, 25°C

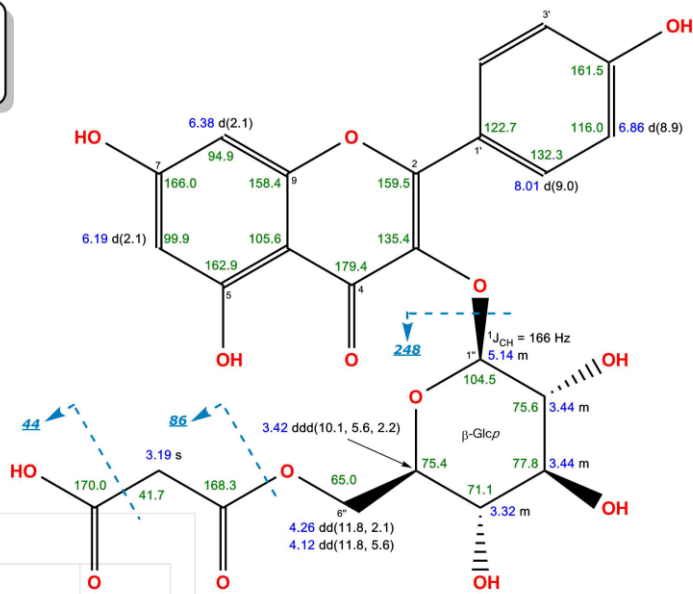

| Quat  | CH              |
|-------|-----------------|
| 179.4 | 132.3           |
| 170.0 | 116.0           |
| 168.3 | 104.5           |
| 166.0 | 99.9            |
| 162.9 | 94.9            |
| 161.5 | 77.8            |
| 159.5 | 75.6            |
| 158.4 | 75.4            |
| 135.4 | 71.1            |
| 122.7 |                 |
| 105.6 | CH <sub>3</sub> |
|       | -               |
|       | CH <sub>2</sub> |
| 65.0  |                 |
| 41.7  |                 |

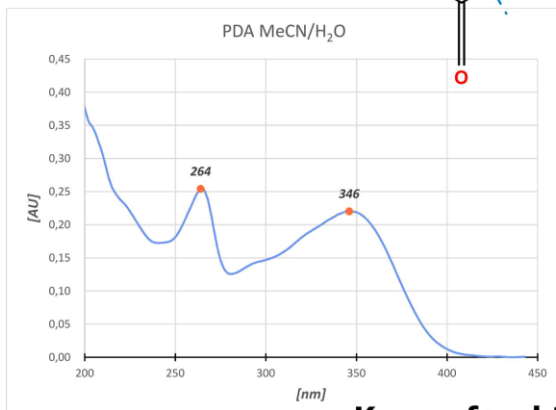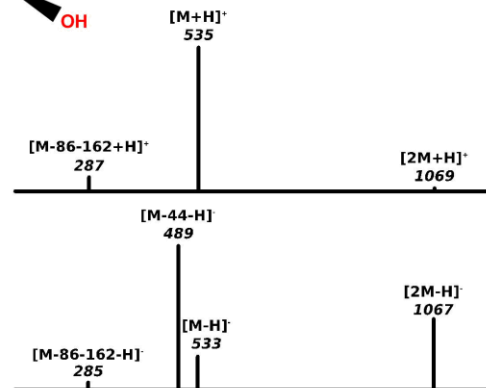

**Kaempferol 3-O-(6''-O-malonyl)-β-glucoside**

**Figure 49S.**  $^1\text{H}$  (500 MHz) and  $^{13}\text{C}$  (125 MHz) NMR data of compound 28 in  $\text{CD}_3\text{OD}$ , 25°C; on-line PDA UV spectrum in MeCN/ $\text{H}_2\text{O}$

**POAmz537Fr\_II\_p44-49\_Fr7-1**

Chemical Formula:  $C_{27}H_{22}O_{12}$   
Molecular Weight: 538.4610

**KNOWN**

MeOH- $d_4$ +TFA, 25°C

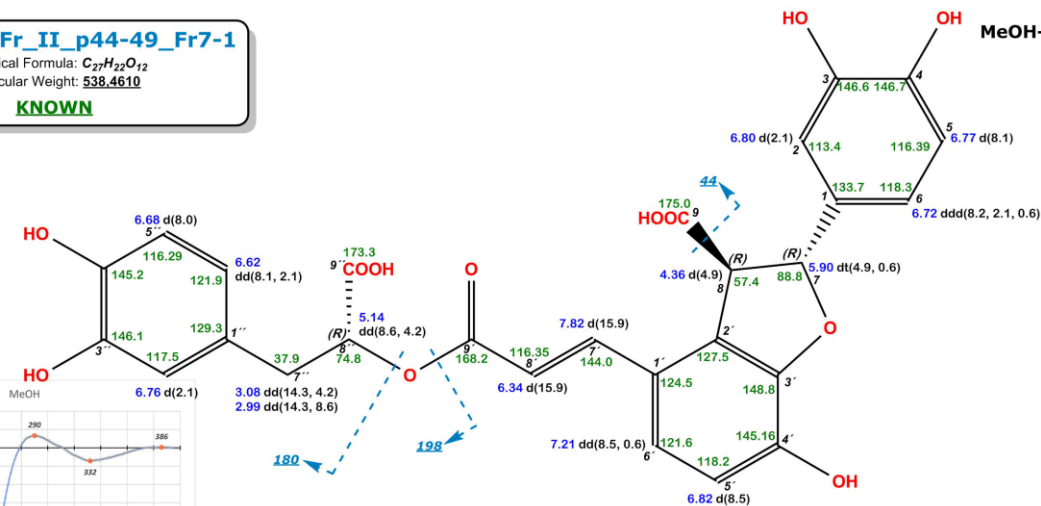

| Quat   | CH              |
|--------|-----------------|
| 175.0  | 144.0           |
| 173.3  | 121.9           |
| 168.2  | 121.6           |
| 148.8  | 118.3           |
| 146.7  | 118.2           |
| 146.6  | 117.5           |
| 145.20 | 116.39          |
| 145.16 | 116.35          |
| 133.7  | 116.29          |
| 129.3  | 113.4           |
| 127.5  | 88.8            |
| 124.5  | 74.8            |
| 57.4   |                 |
|        | CH <sub>2</sub> |
| 37.9   |                 |
|        | CH <sub>3</sub> |
|        | -               |

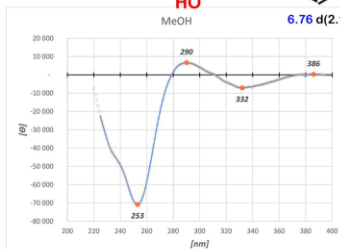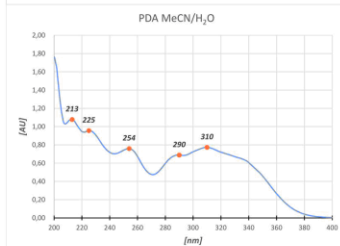

$[\alpha]_{23}^D = -120.9^\circ$  (c 0.78, MeOH, exp. our lab)  
 $[\alpha]_{23}^D = -86.2^\circ$  (c unk, MeOH, lit.)  
ECD (c 0.05 MeOH) / nm ( $[\Delta\epsilon]$ ):  
230 (-15.98), 252 (-22.77), 288 (1.73), 333 (-1.64)

**Monardic acid A**

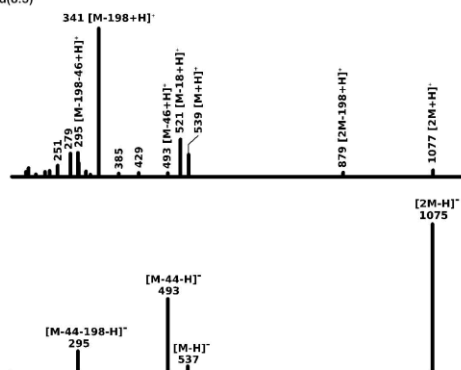

1. Murata, T., Oyama, K., Fujiyama, M., Oobayashi, B., Umehara, K., Miyase, T., Yoshizaki, F., 2013. Diastereomers of lithospermic acid and lithospermic acid B from *Monarda fistulosa* and *Lithospermum erythrorhizon*. *Fitoterapia* 91, 51–59. doi:10.1016/j.fitote.2013.08.009

**Figure 50S.**  $^1\text{H}$  (500 MHz) and  $^{13}\text{C}$  (125 MHz) NMR data of compound 29 in  $\text{CD}_3\text{OD}$ , 25°C; on-line PDA UV spectrum in MeCN/ $\text{H}_2\text{O}$ ; ECD spectrum in MeOH

**POAmz509Fr\_II\_p44-49\_Fr5**  
 Chemical Formula:  $C_{26}H_{22}O_{11}$   
 Molecular Weight: 510.4510  
**NEW!**

MeOH- $d_4$ +TFA, 25°C

| Quat  | CH              |
|-------|-----------------|
| 192.0 | 133.3           |
| 173.8 | 132.7           |
| 173.2 | 131.4           |
| 167.8 | 121.9           |
| 146.9 | 114.4           |
| 146.8 | 117.5           |
| 146.2 | 116.9           |
| 145.4 | 116.4           |
| 142.1 | 114.8           |
| 141.2 | 74.8            |
| 132.5 |                 |
| 132.4 | CH <sub>3</sub> |
| 129.2 | -               |

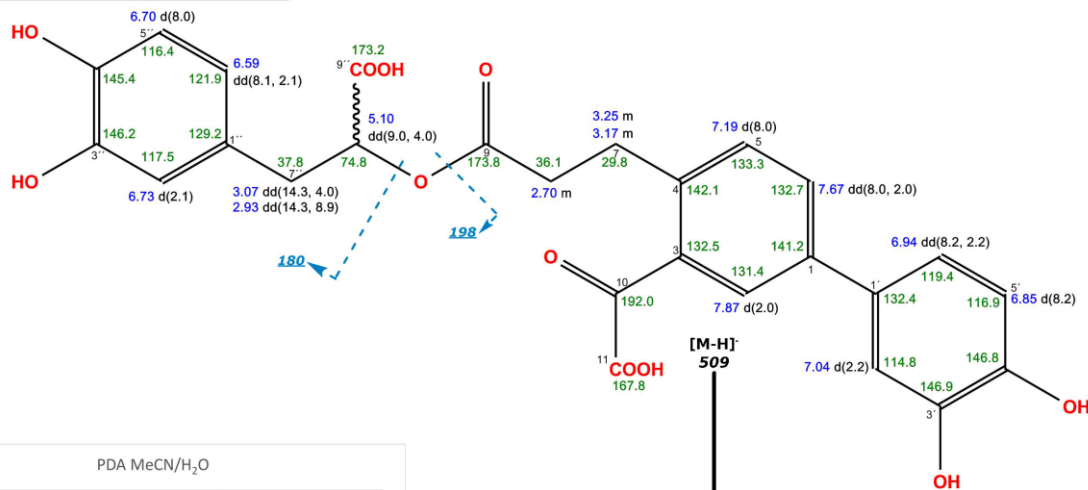

| CH <sub>2</sub> |
|-----------------|
| 37.8            |
| 36.1            |
| 29.8            |

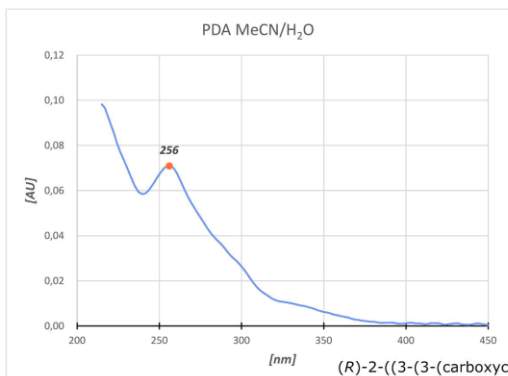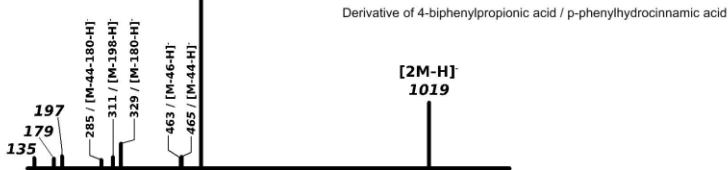

**Yunnaneic acid E-1**

(R)-2-((3-(3-(carboxycarbonyl)-3',4'-dihydroxy-[1,1'-biphenyl]-4-yl)propanoyl)oxy)-3-(3,4-dihydroxyphenyl)propanoic acid

**Figure 51S.** <sup>1</sup>H (500 MHz) and <sup>13</sup>C (125 MHz) NMR data of compound 30 in CD<sub>3</sub>OD, 25°C; on-line PDA UV spectrum in MeCN/H<sub>2</sub>O

<sup>1</sup>H NS16 CD3OD+TFA (0.1%) 25°C - NS=16

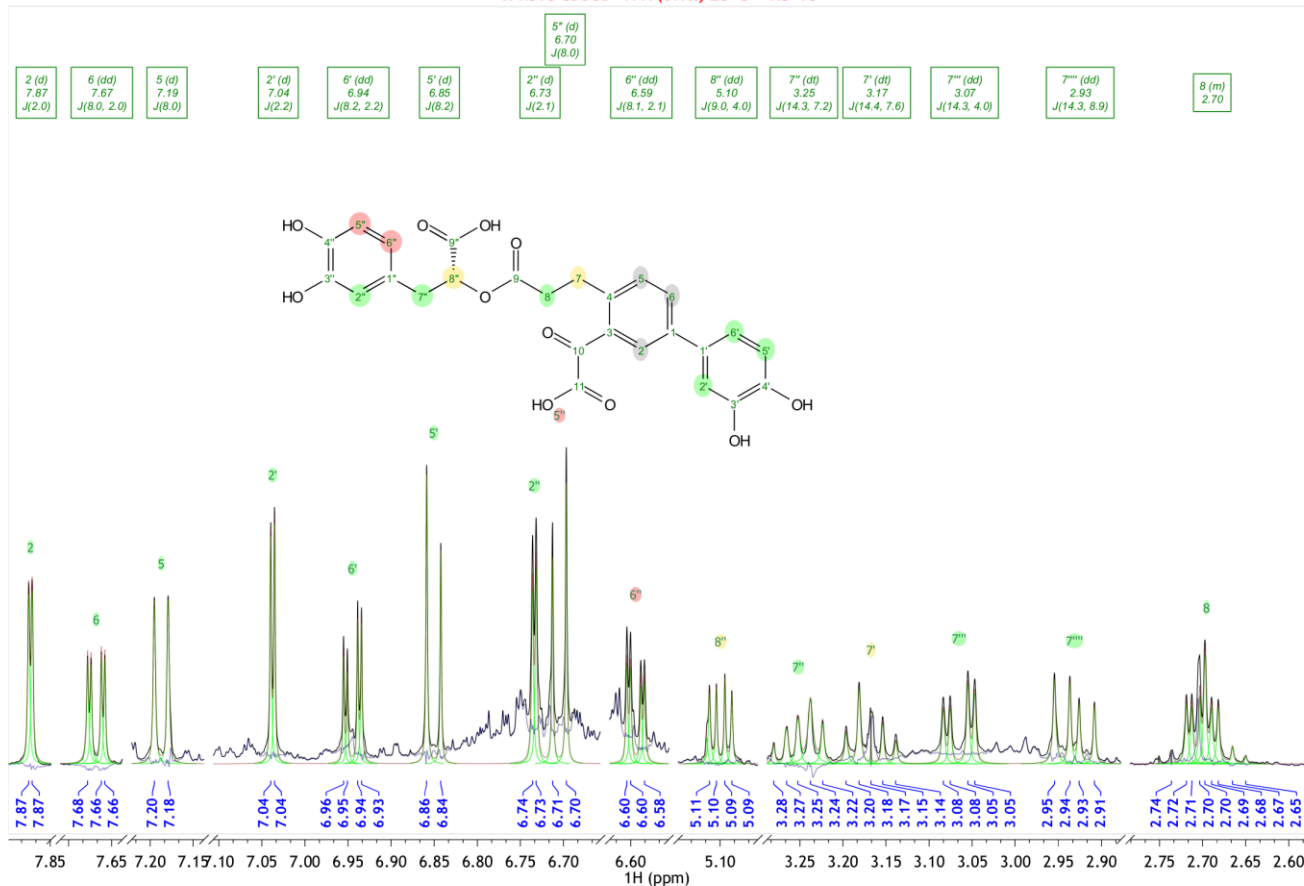

**Figure 52S.** <sup>1</sup>H NMR spectrum of compound 30

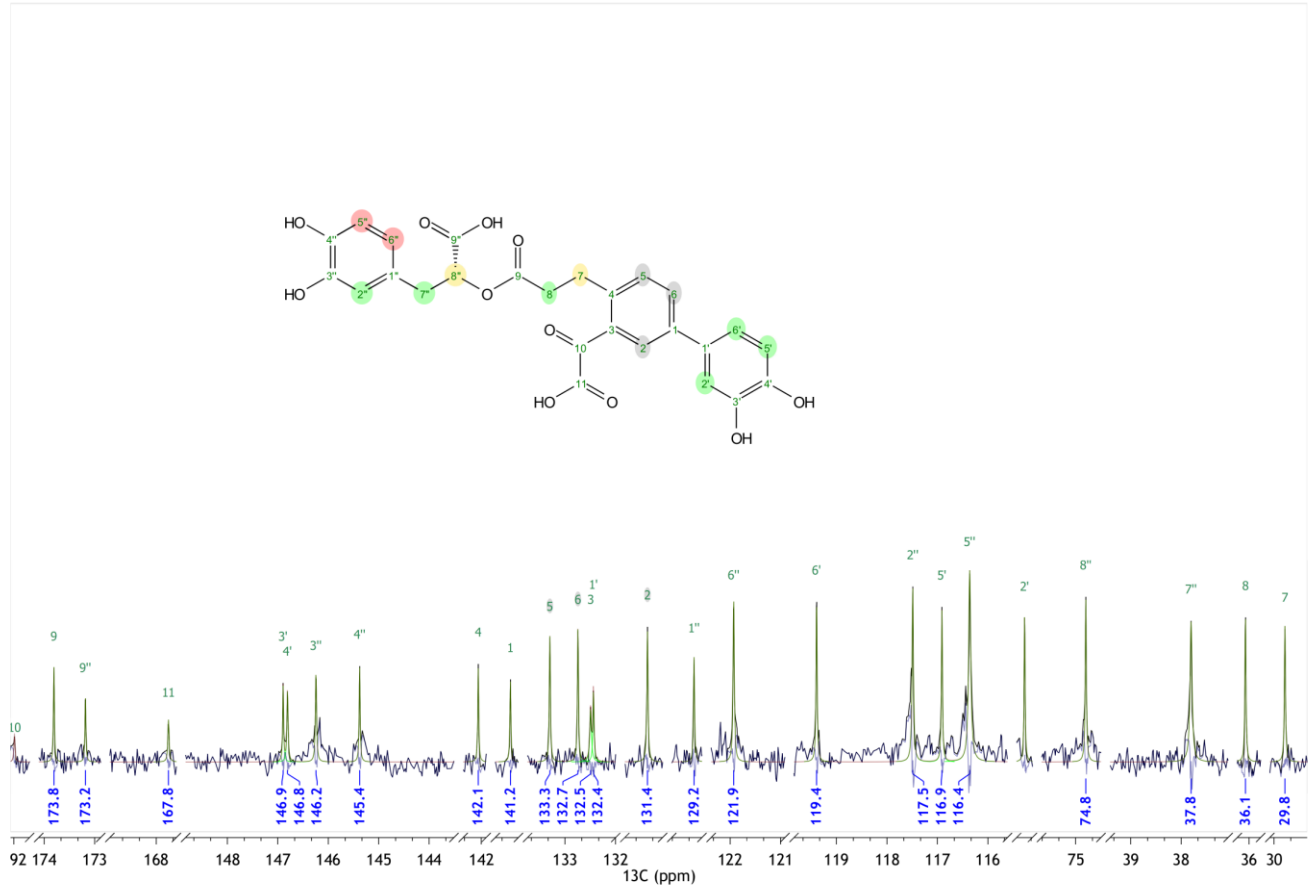

Figure 53S. <sup>13</sup>C DEPTQ NMR spectrum of compound 30

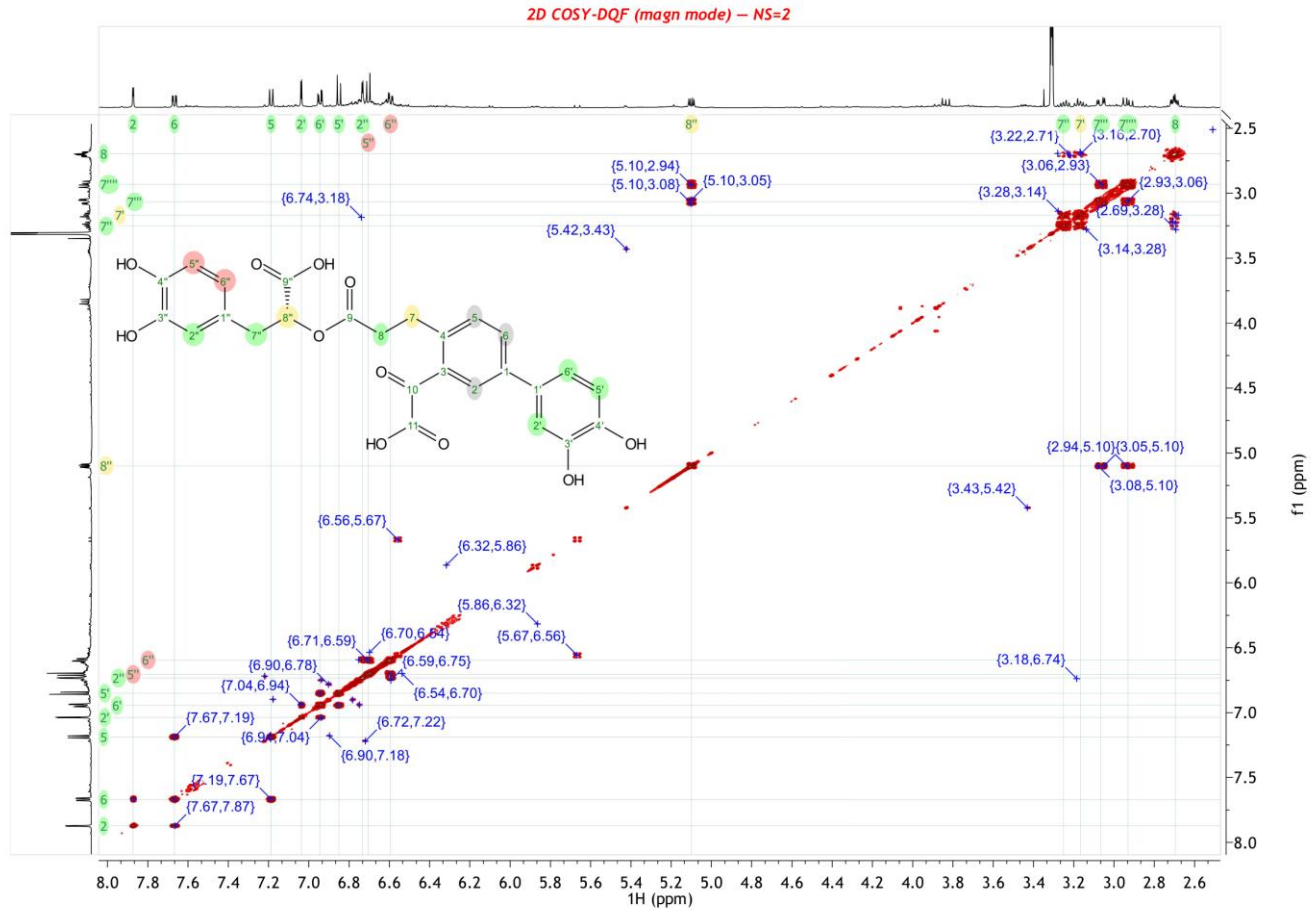

Figure 54S. <sup>1</sup>H-<sup>1</sup>H COSY NMR spectrum of compound 30



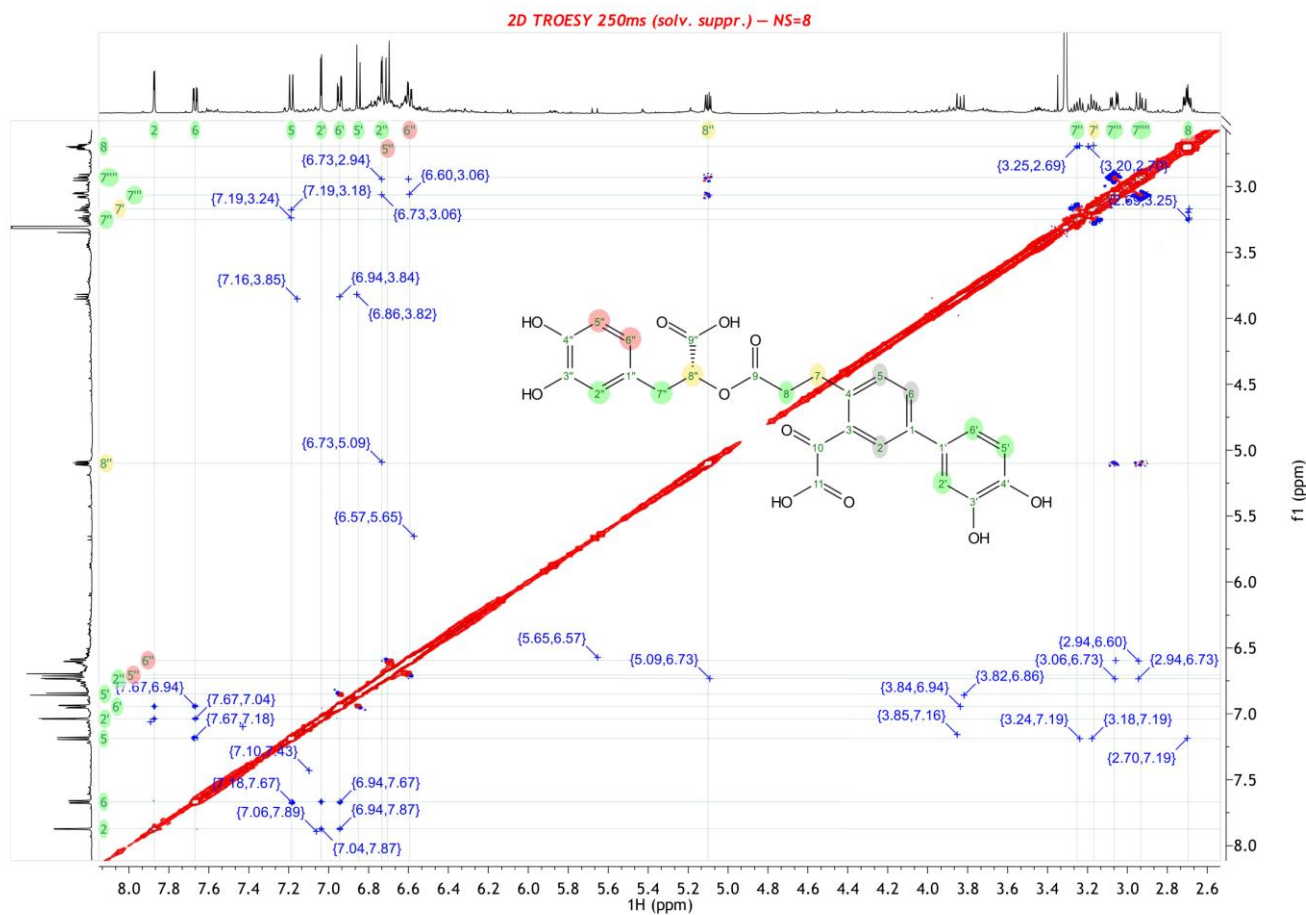

**Figure 55S.**  $^1\text{H}$ - $^1\text{H}$  TROESY (250 ms) NMR spectrum of compound 30

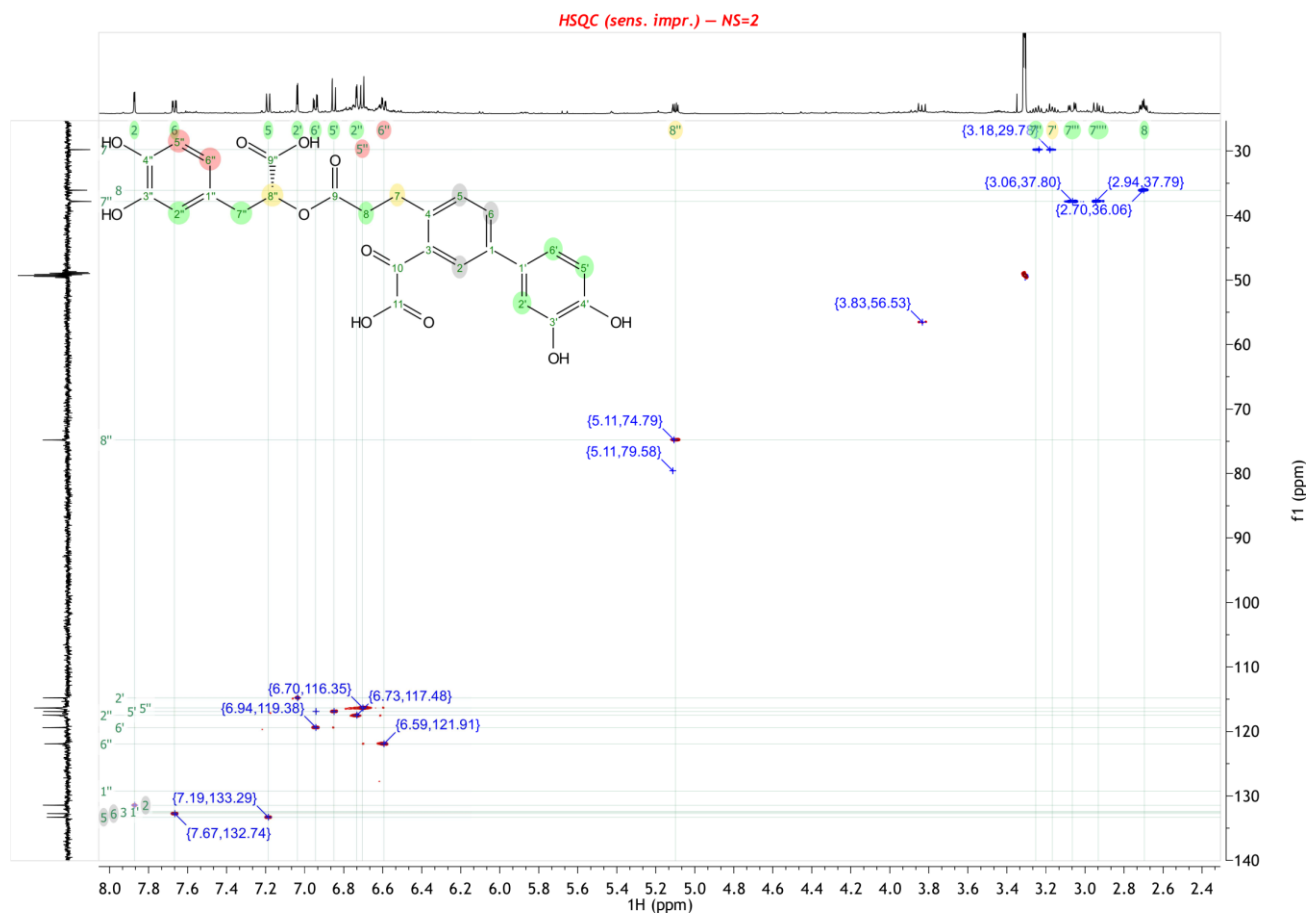

**Figure 56S.**  $^1\text{H}$ - $^{13}\text{C}$  HSQC NMR spectrum of compound 30

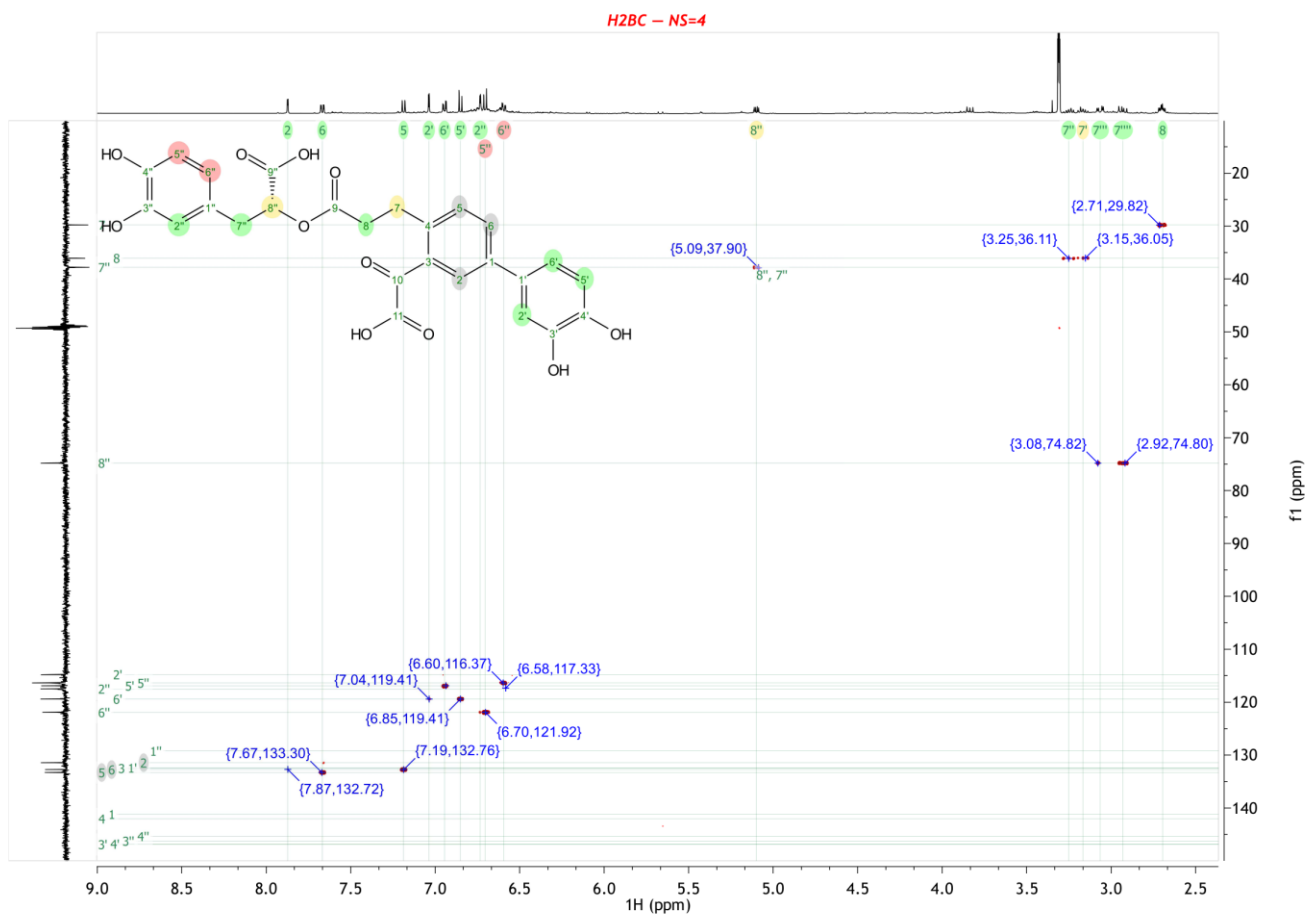

**Figure 57S.**  $^1\text{H}$ - $^{13}\text{C}$  H2BC NMR spectrum of compound 30

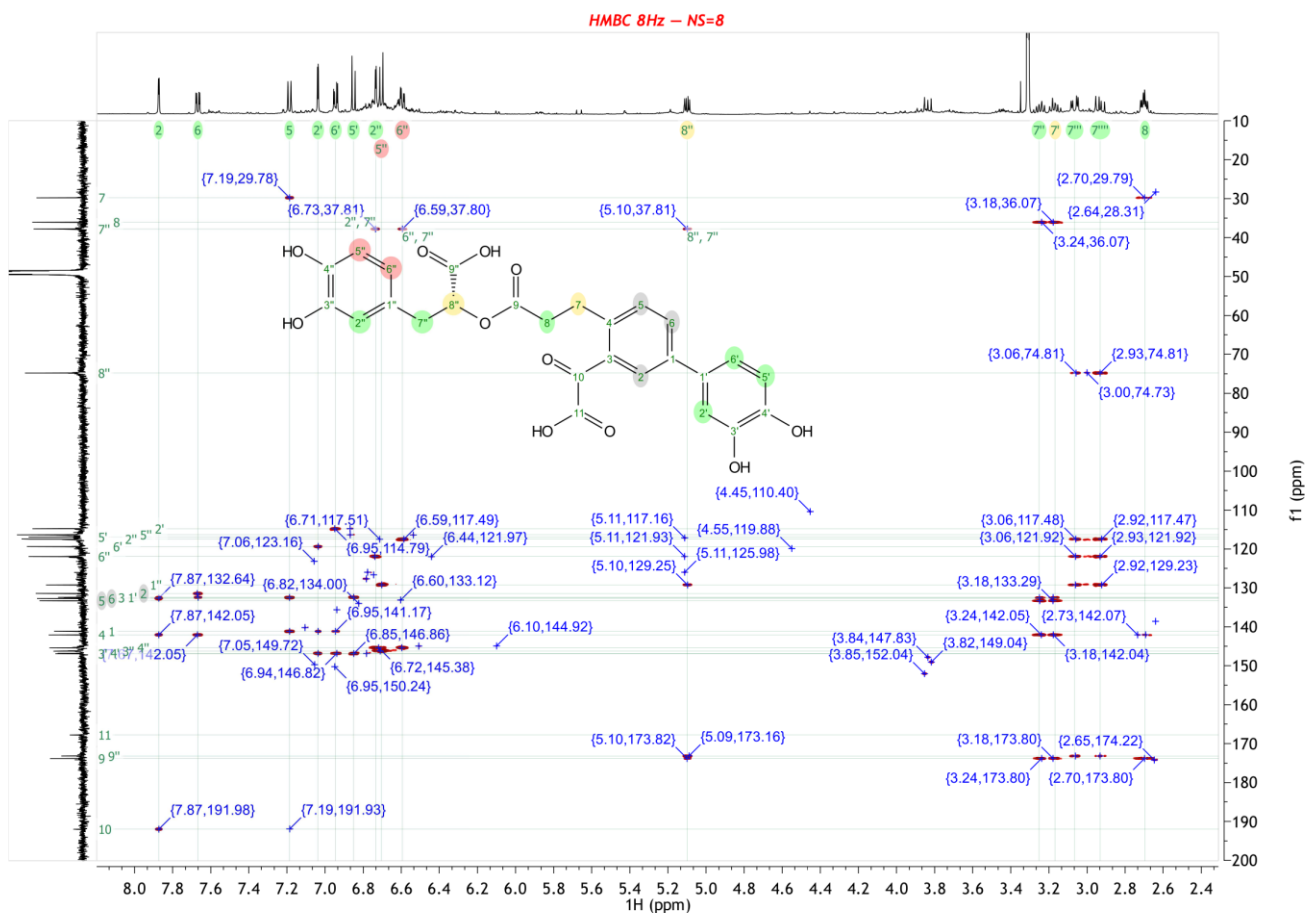

**Figure 58S.**  $^1\text{H}$ - $^{13}\text{C}$  HMBC (8 Hz) NMR spectrum of compound 30

**POAmz537Fr\_II\_p44-49\_Fr9**

Chemical Formula:  $C_{27}H_{22}O_{12}$   
Molecular Weight: **538.4610**

**KNOWN**

MeOH- $d_4$ +TFA, 25°C

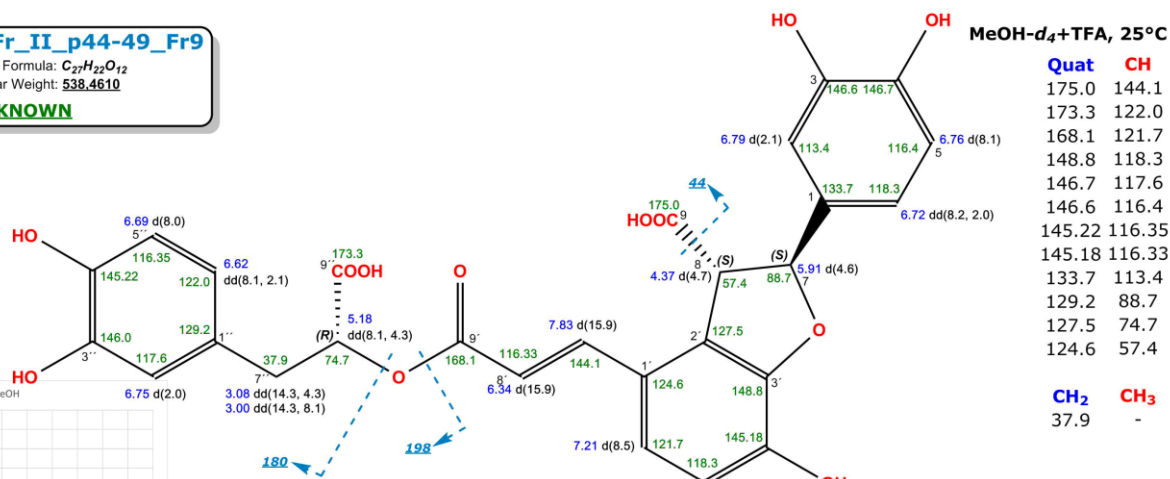

| Quat   | CH                    |
|--------|-----------------------|
| 175.0  | 144.1                 |
| 173.3  | 122.0                 |
| 168.1  | 121.7                 |
| 148.8  | 118.3                 |
| 146.7  | 117.6                 |
| 146.6  | 116.4                 |
| 145.22 | 116.35                |
| 145.18 | 116.33                |
| 133.7  | 113.4                 |
| 129.2  | 88.7                  |
| 127.5  | 74.7                  |
| 124.6  | 57.4                  |
|        | <b>CH<sub>2</sub></b> |
|        | <b>CH<sub>3</sub></b> |
|        | 37.9                  |

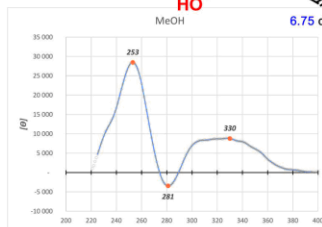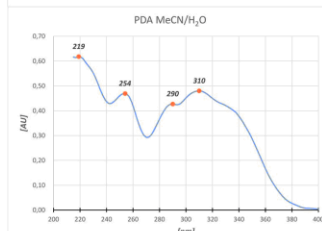

$[\alpha]_{25}^D = +154.9^\circ$  (c 0.90, MeOH, exp. our lab)  
 $[\alpha]_D = +78^\circ$   
 $[\alpha]_D = +68.3^\circ$   
 $[\alpha]_D = +56.5^\circ$   
 $[\alpha]_D = +136.9^\circ$  (c unk, MeOH, total synth)<sup>1</sup>

**(+)-Lithospermic acid A**

1. O'Malley, S.J., Tan, K.L., Watzke, A., Bergman, R.G., Ellman, J.A., 2005. Total Synthesis of (+)-Lithospermic Acid by Asymmetric Intramolecular Alkylation via Catalytic C-H Bond Activation. *J. Am. Chem. Soc.* 127, 13496-13497. doi:10.1021/ja052680h  
2. Murata, T., Oyama, K., Fujiyama, M., Oobayashi, B., Umehara, K., Miyase, T., Yoshizaki, F., 2013. Diastereomers of lithospermic acid and lithospermic acid B from *Monarda fistulosa* and *Lithospermum erythrorhizon*. *Fitoterapia* 91, 51-59. doi:10.1016/j.fitote.2013.08.009

**Figure 59S.**  $^1H$  (500 MHz) and  $^{13}C$  (125 MHz) NMR data of compound 31 in  $CD_3OD$ , 25°C; on-line PDA UV spectrum in MeCN/ $H_2O$

**POAmz999Fr\_VI-VII\_p50-52\_6B**

Chemical Formula:  $C_{47}H_{52}O_{24}$   
Molecular Weight: **1000.9090**

**NEW!**

MeOH- $d_4$ , 25°C

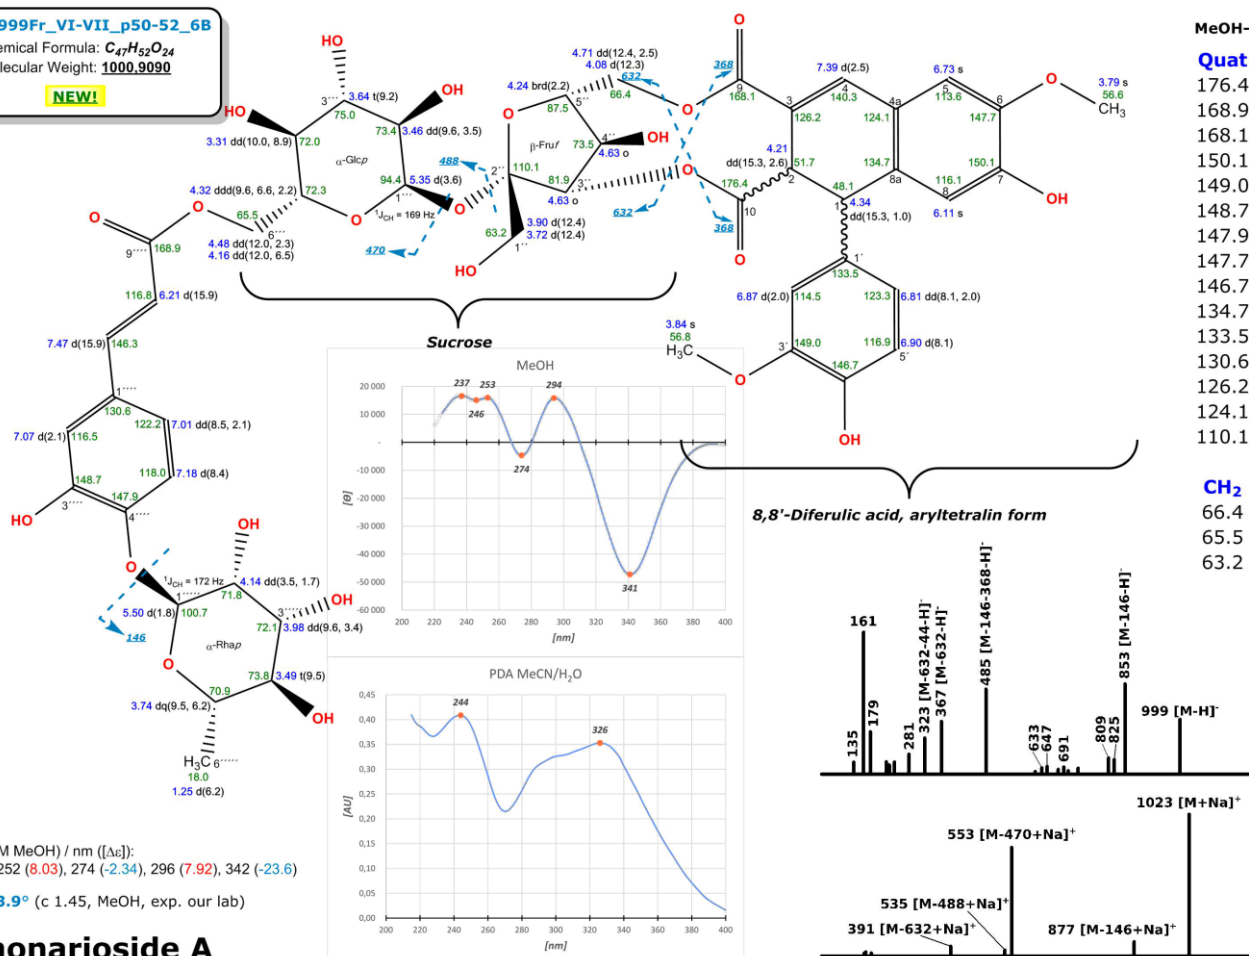

| Quat  | CH                    |
|-------|-----------------------|
| 176.4 | 146.3                 |
| 168.9 | 140.3                 |
| 168.1 | 123.3                 |
| 150.1 | 122.2                 |
| 149.0 | 118.0                 |
| 148.7 | 116.9                 |
| 147.9 | 116.8                 |
| 147.7 | 116.5                 |
| 146.7 | 116.1                 |
| 134.7 | 114.5                 |
| 133.5 | 113.6                 |
| 130.6 | 100.7                 |
| 126.2 | 94.4                  |
| 124.1 | 87.5                  |
| 124.1 | 87.5                  |
| 110.1 | 81.9                  |
|       | 75.0                  |
|       | <b>CH<sub>2</sub></b> |
|       | 73.8                  |
|       | 73.5                  |
|       | 73.4                  |
|       | 72.3                  |
|       | 72.1                  |
|       | 72.0                  |
|       | 71.8                  |
|       | 70.9                  |
|       | 51.7                  |
|       | 48.1                  |
|       | <b>CH<sub>3</sub></b> |
|       | 56.8                  |
|       | 56.6                  |
|       | 18.0                  |

ECD (c 50μM MeOH) / nm ( $[\Delta\epsilon]$ ):  
234 (8.38), 252 (8.03), 274 (-2.34), 296 (7.92), 342 (-23.6)

$[\alpha]_{23}^D = -73.9^\circ$  (c 1.45, MeOH, exp. our lab)

**Pulmonarioside A**

**Figure 60S.**  $^1H$  (500 MHz) and  $^{13}C$  (125 MHz) NMR data of compound 32 in  $CD_3OD$ , 25°C; on-line PDA UV spectrum in MeCN/ $H_2O$

<sup>1</sup>H solv suppr – NS=16

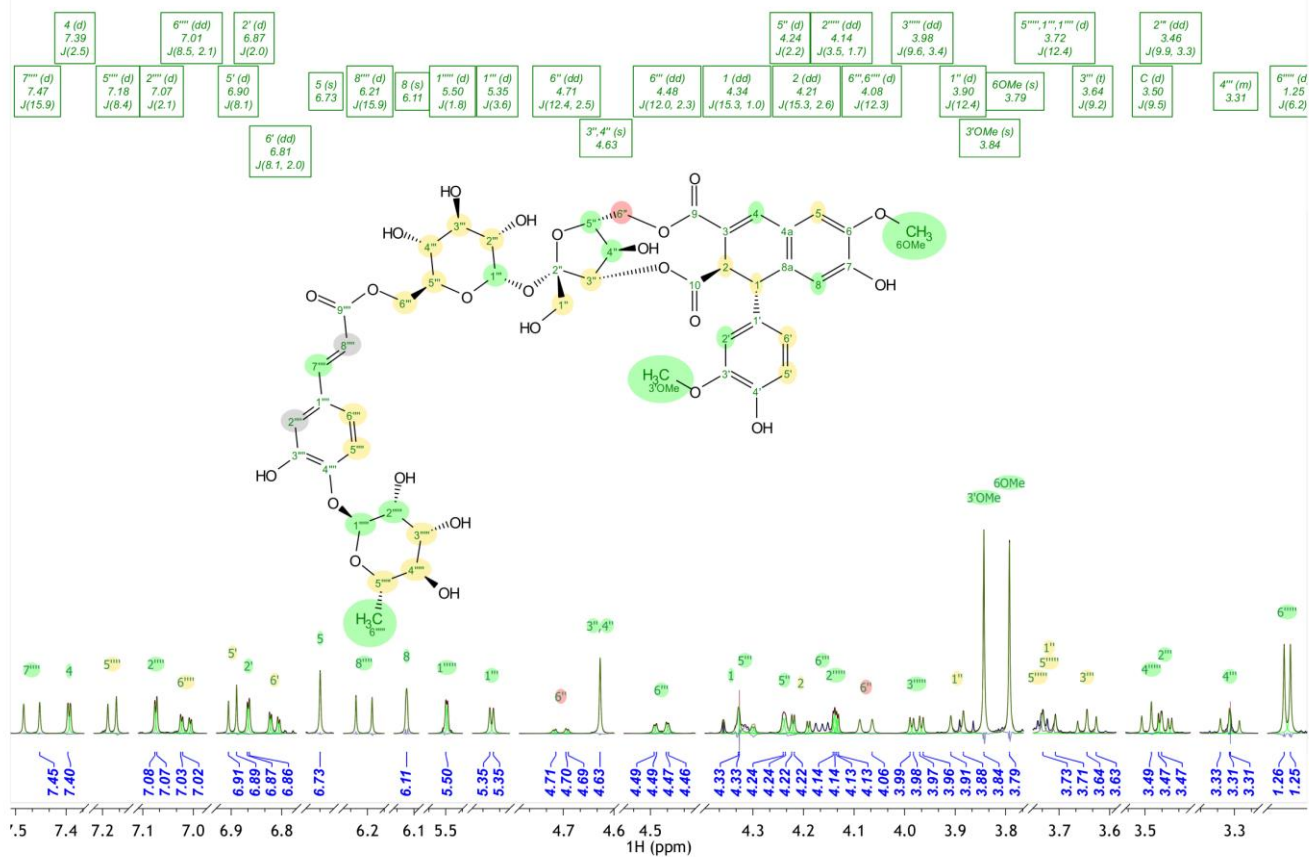

Figure 61S. <sup>1</sup>H NMR spectrum of compound 32

<sup>13</sup>C DEPT Q – NS=1024

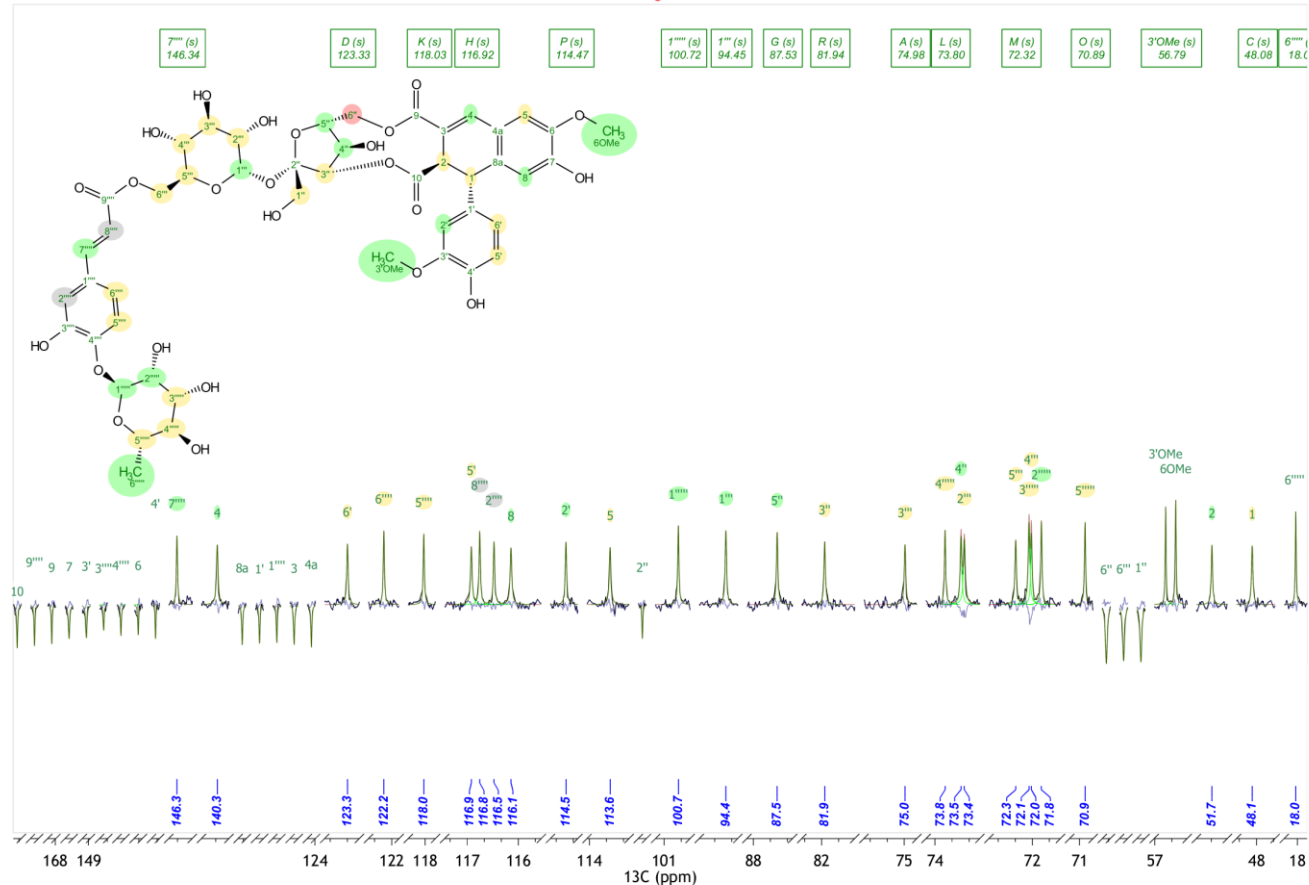

Figure 62S. <sup>13</sup>C DEPTQ NMR spectrum of compound 32

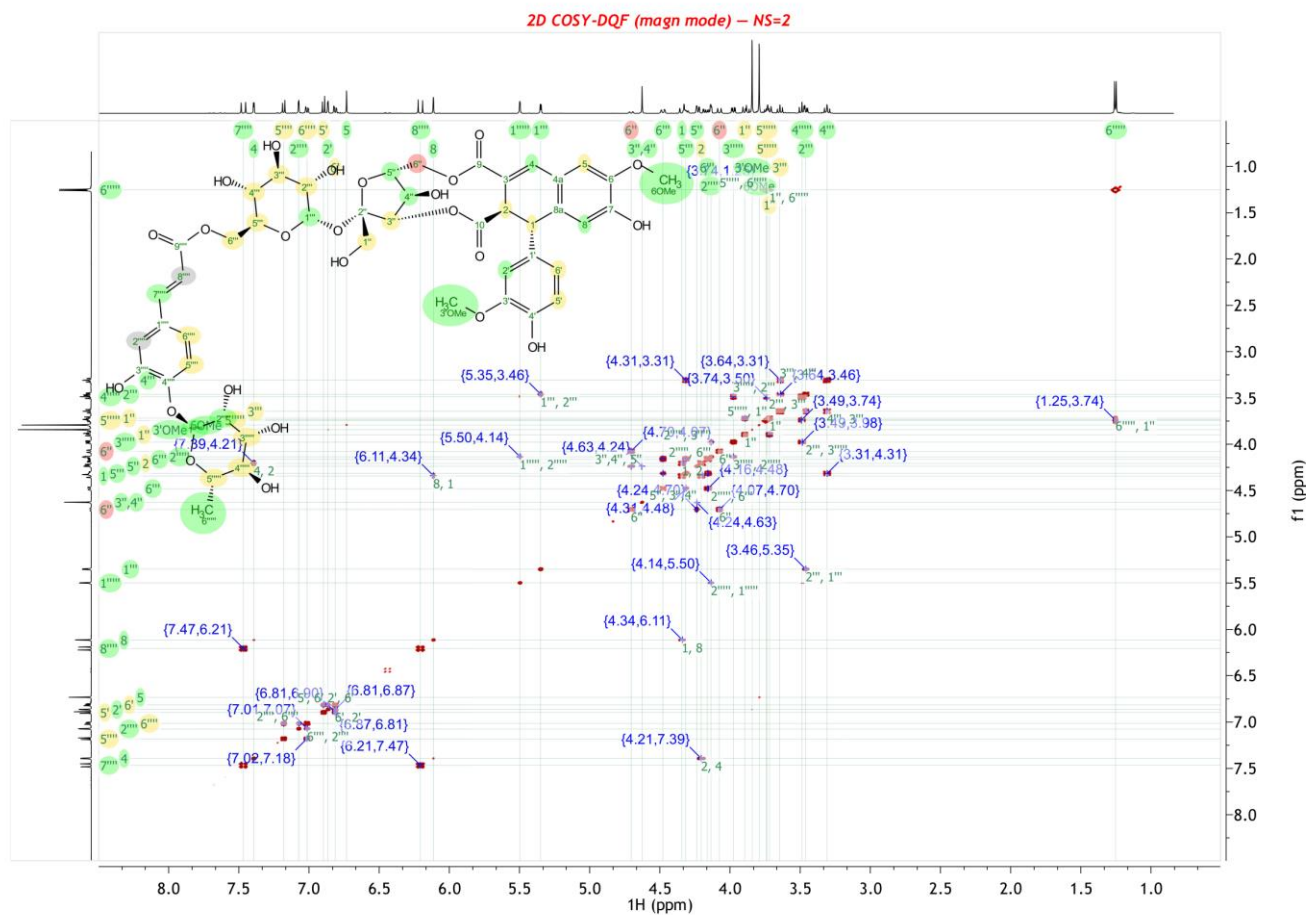

**Figure 63S.**  $^1\text{H}$ - $^1\text{H}$  COSY NMR spectrum of compound 32

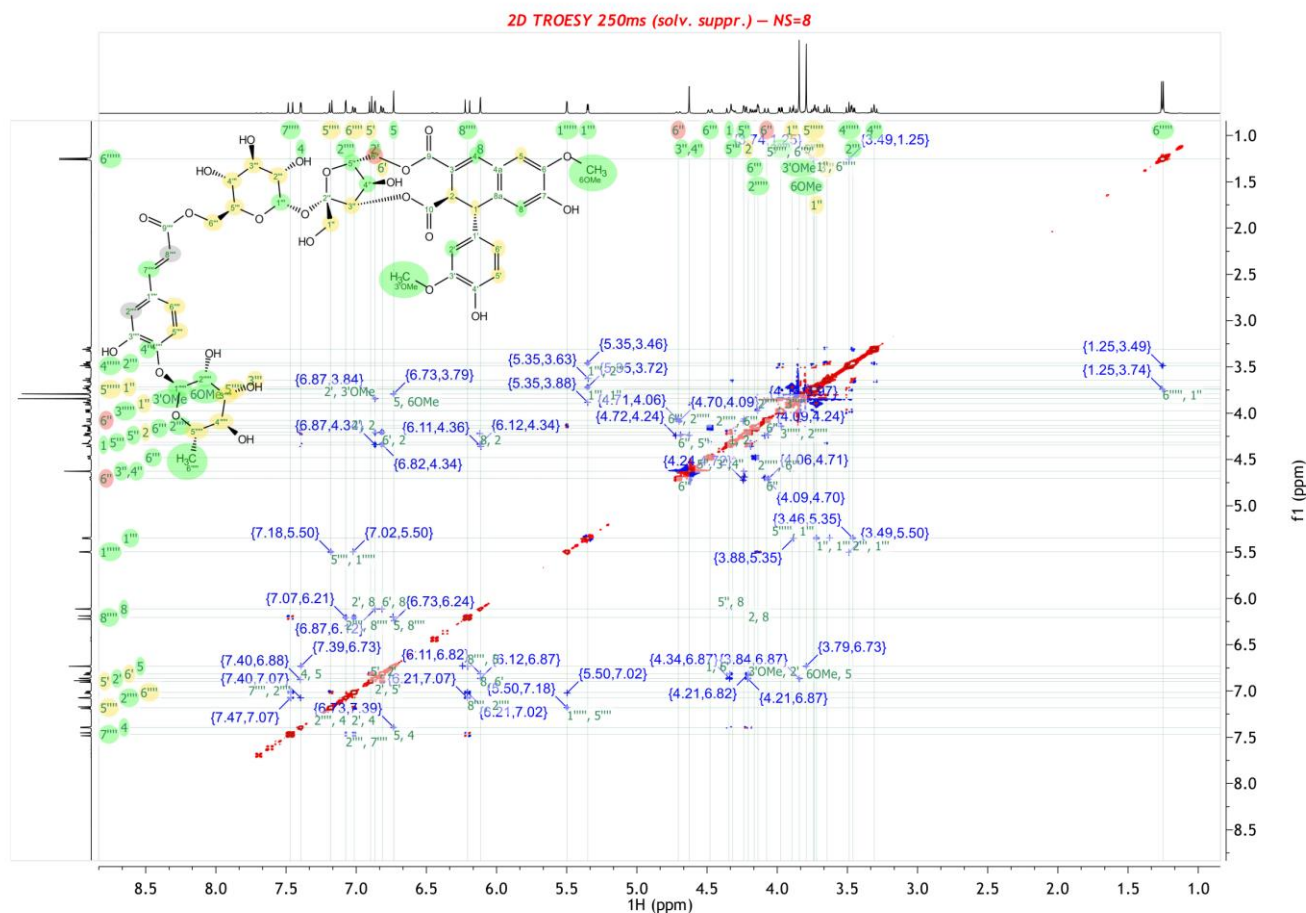

**Figure 64S.**  $^1\text{H}$ - $^1\text{H}$  TROESY (250 ms) NMR spectrum of compound 32

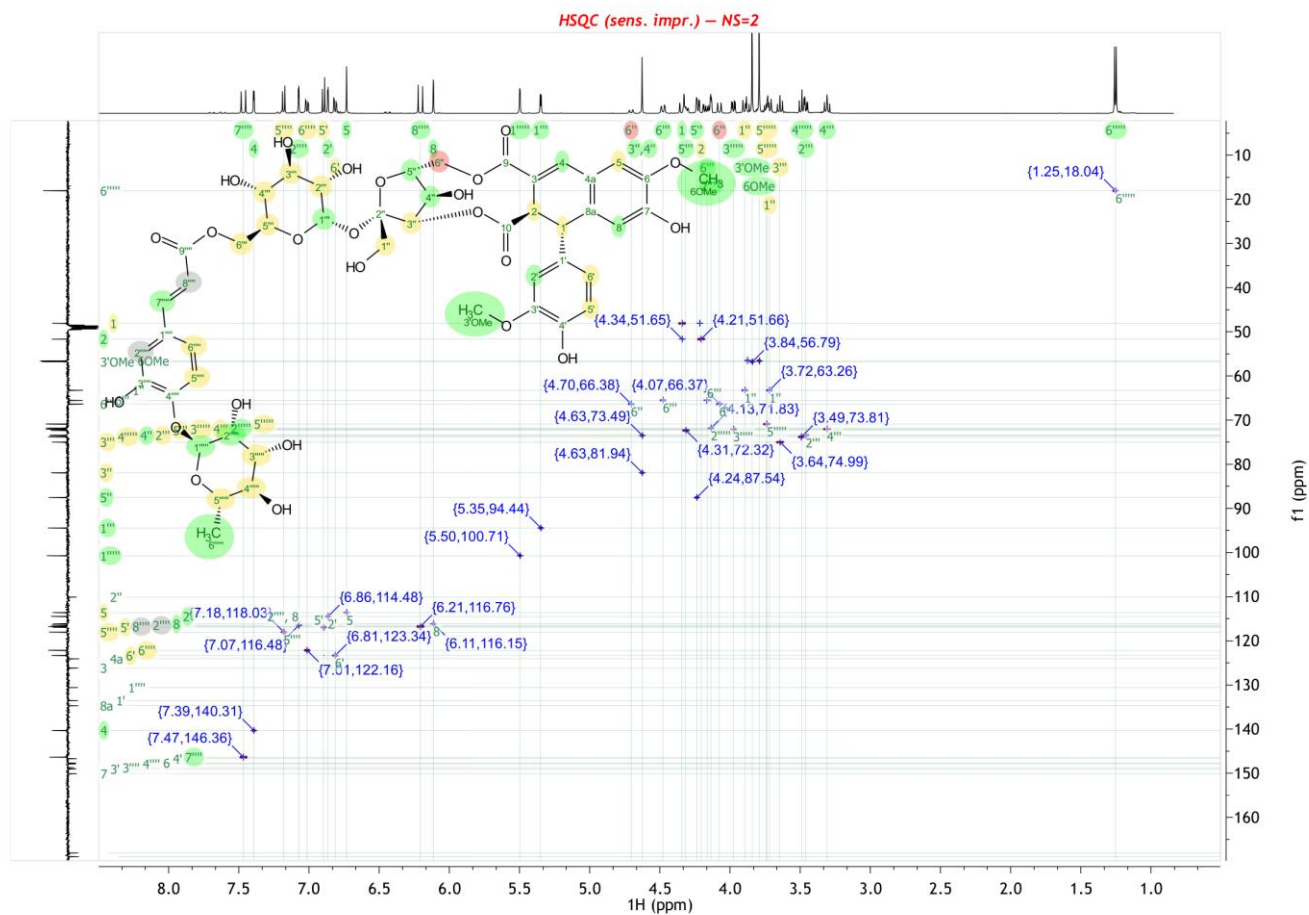

**Figure 65S.**  $^1\text{H}$ - $^{13}\text{C}$  HSQC NMR spectrum of compound 32

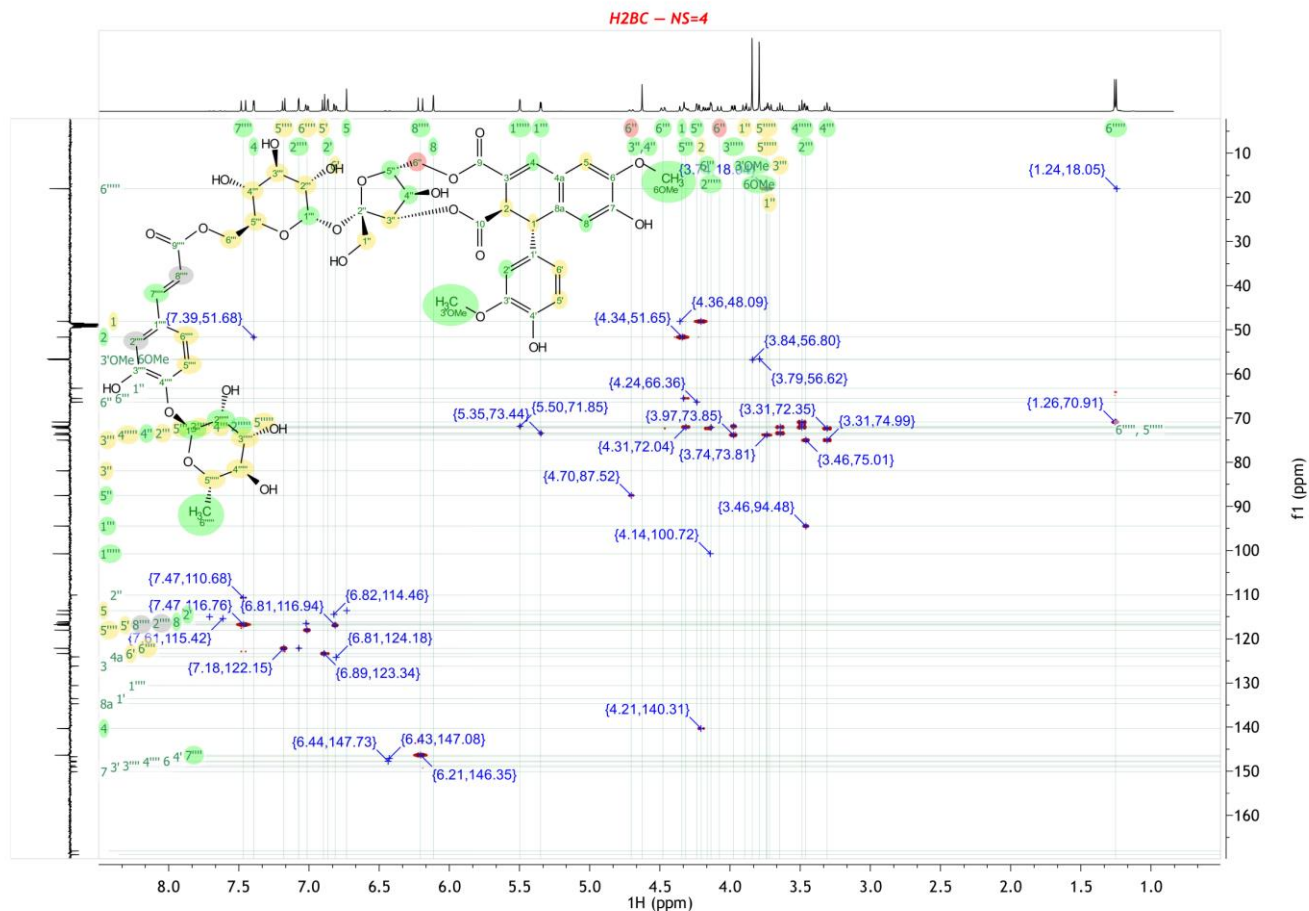

**Figure 66S.**  $^1\text{H}$ - $^{13}\text{C}$  H2BC NMR spectrum of compound 32

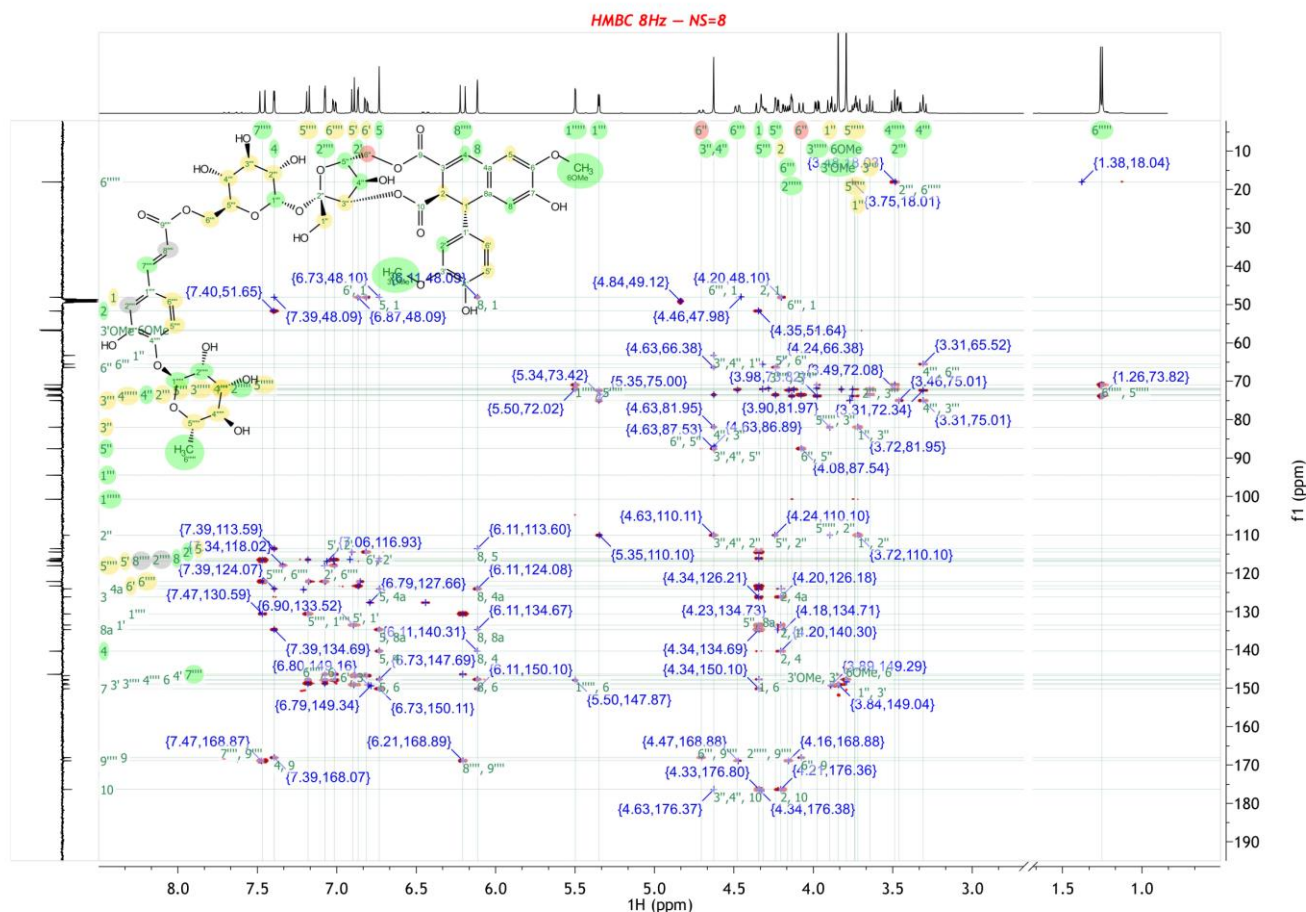

Figure 67S.  $^1\text{H}$ - $^{13}\text{C}$  HMBC (8 Hz) NMR spectrum of compound 32

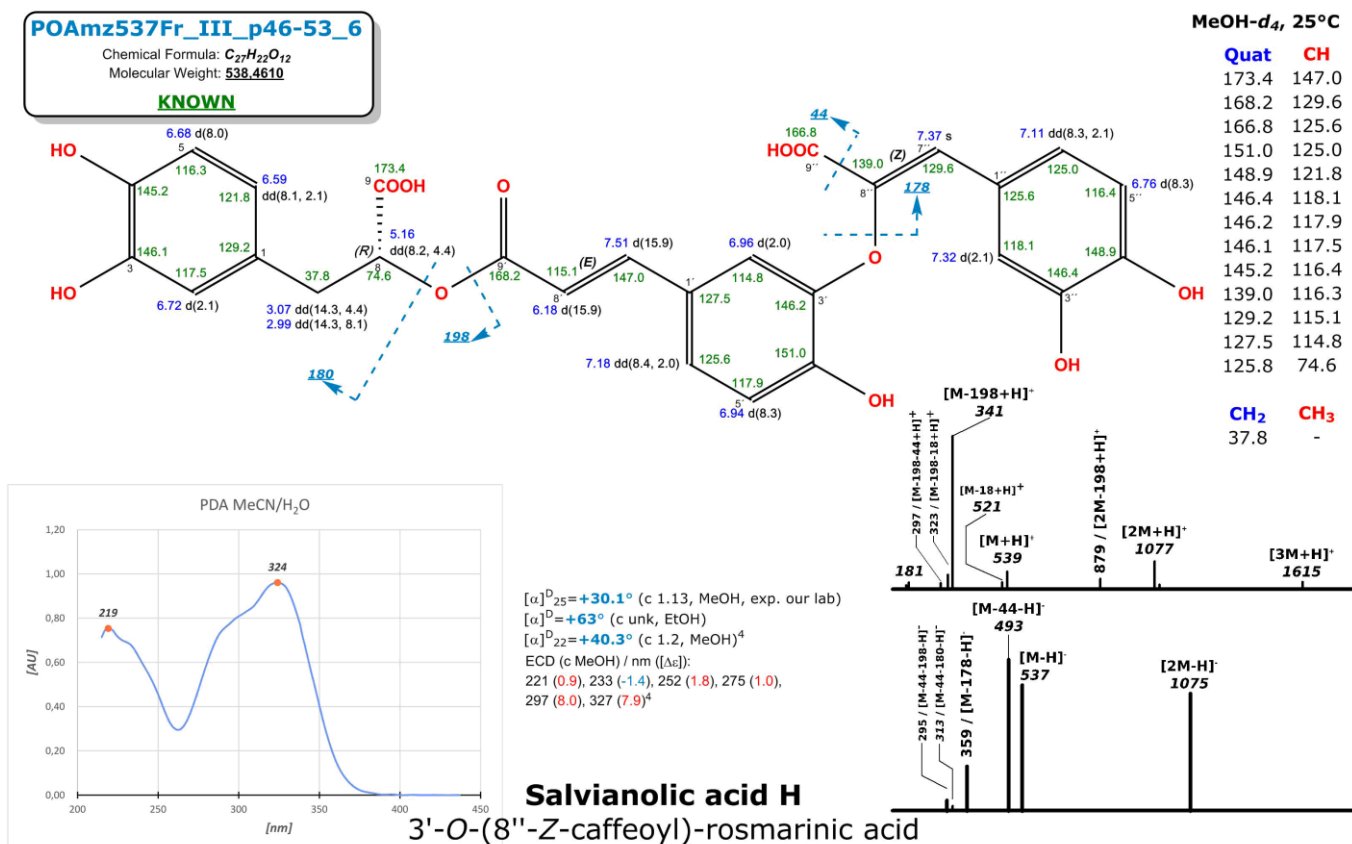

1. Zhang, H.J., Li, L.N., 1993. Salviannolic acid H, a new depside from *Salvia cavalerieri* var. *simplicifolia*. Chinese Chem. Lett. 4, 501-504.  
 2. Yan, X., 2015. Dan Shen (*Salvia miltiorrhiza*) in Medicine. Springer Netherlands, Dordrecht. doi:10.1007/978-94-017-9463-3  
 3. AGATA, I., KUSAKABE, H., HATANO, T., NISHIBE, S., OKUDA, T., 1993. Melitric Acids A and B, New Trimeric Caffeic Acid Derivatives from *Melissa officinalis*. Chem. Pharm. Bull. (Tokyo). 41, 1608-1611. doi:10.1248/cpb.41.1608  
 4. Dapkevicius, A., van Beek, T.A., Lelyveld, G.P., van Veldhuizen, A., de Groot, A., Linssen, J.P.H., Venskutonis, R., 2002. Isolation and Structure Elucidation of Radical Scavengers from *Thymus vulgaris* Leaves. J. Nat. Prod. 65, 892-896. doi:10.1021/np010636j

Figure 68S.  $^1\text{H}$  (500 MHz) and  $^{13}\text{C}$  (125 MHz) NMR data of compound 33 in  $\text{CD}_3\text{OD}$ , 25°C; on-line PDA UV spectrum in  $\text{MeCN}/\text{H}_2\text{O}$

**POAmz717Fr\_II\_p44-49\_11-2**  
 Chemical Formula:  $C_{36}H_{30}O_{16}$   
 Molecular Weight: **718,6200**  
**KNOWN**

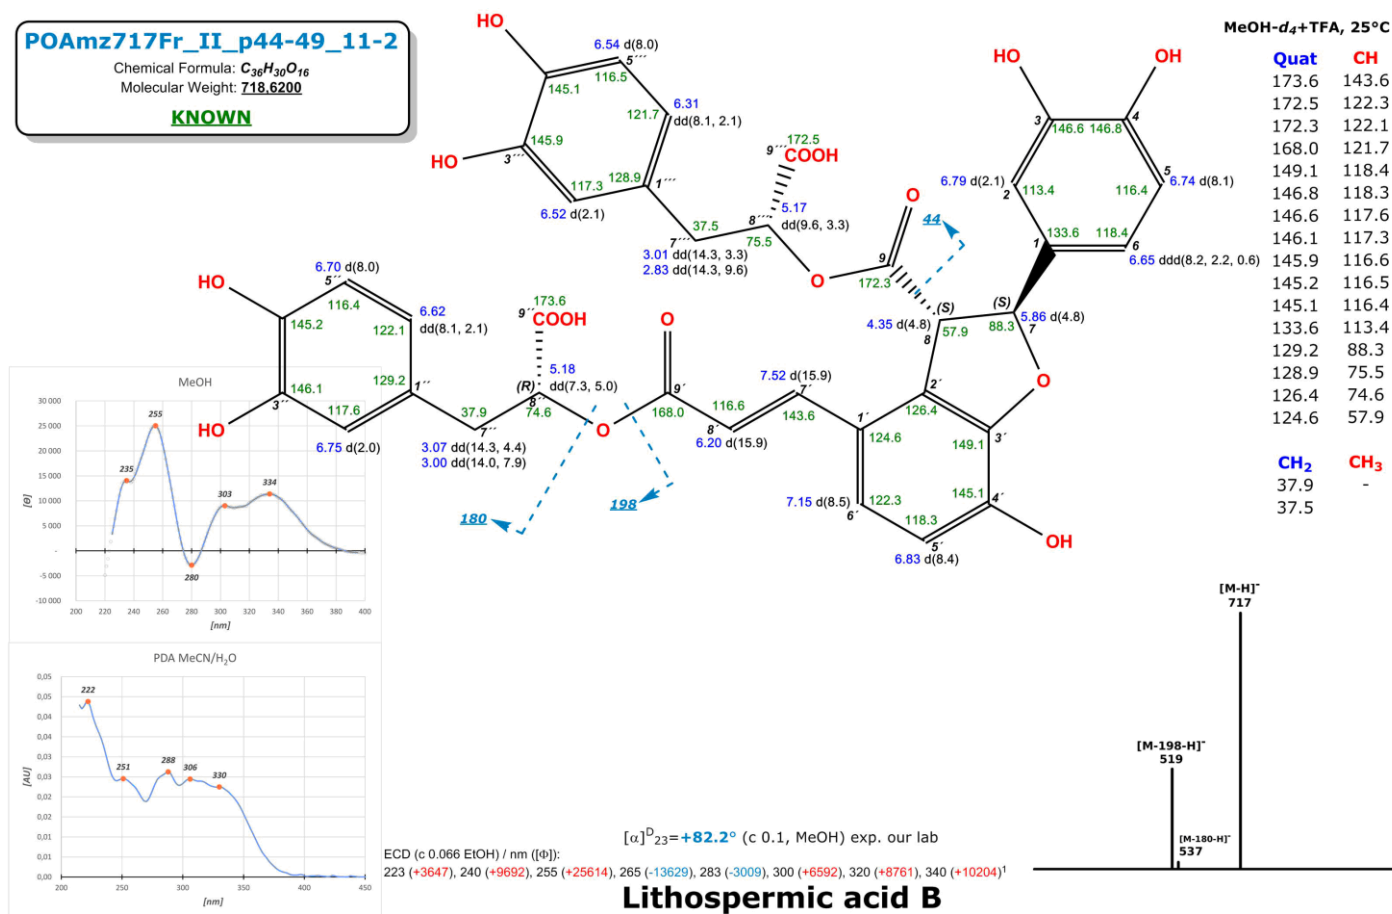

Anja Watzke, Steven J. O'Malley, Robert G. Bergman, \* and, Eilman\*, J.A., 2006. Reassignment of the Configuration of Salvianolic Acid B and Establishment of Its Identity with Lithospermic Acid B. doi:10.1021/NP060136W

**Figure 69S.** <sup>1</sup>H (500 MHz) and <sup>13</sup>C (125 MHz) NMR data of compound 34 in CD<sub>3</sub>OD, 25°C; on-line PDA UV spectrum in MeCN/H<sub>2</sub>O; ECD spectrum in MeOH

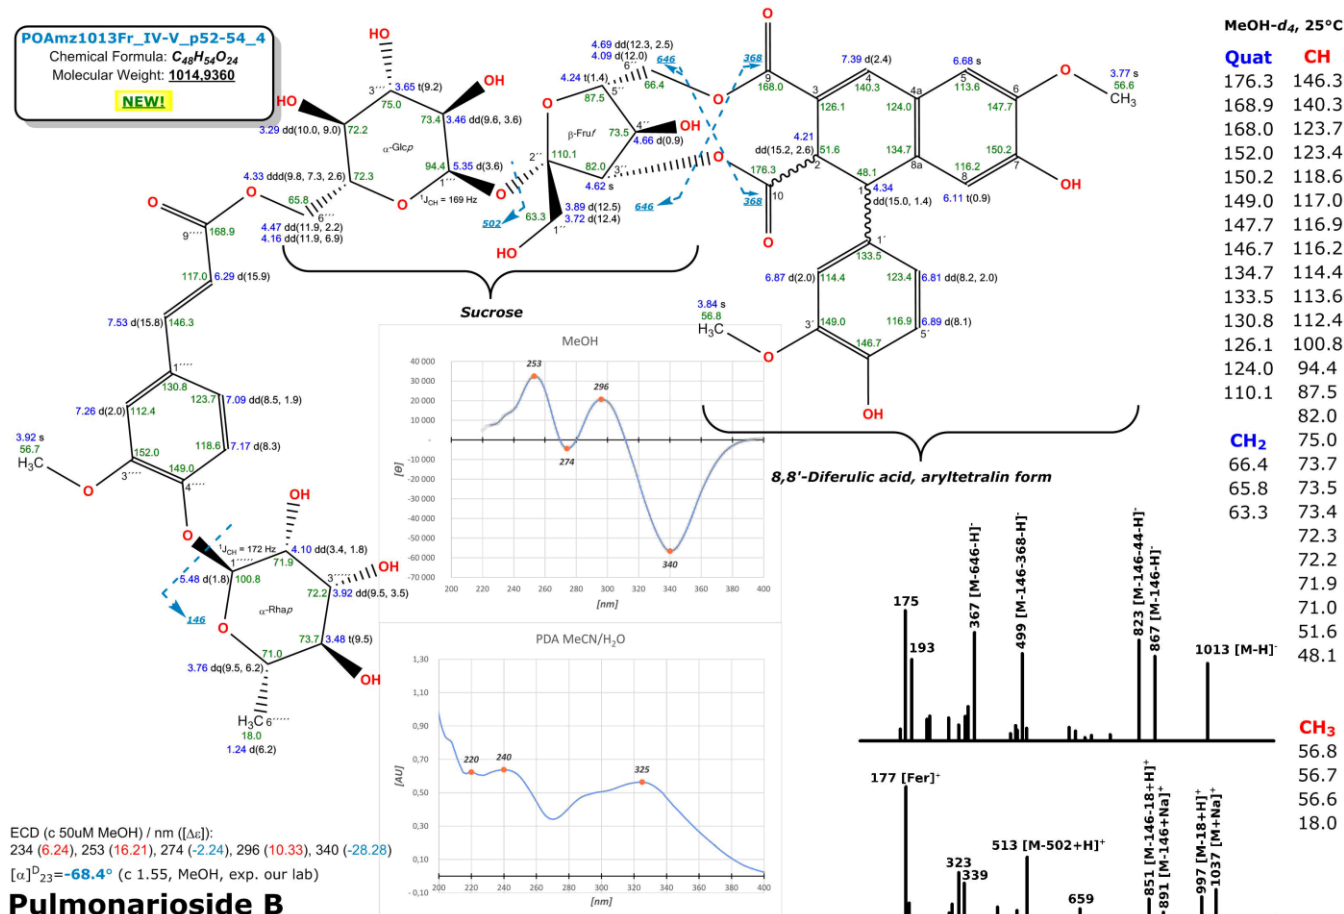

**Figure 70S.** <sup>1</sup>H (500 MHz) and <sup>13</sup>C (125 MHz) NMR data of compound 35 in CD<sub>3</sub>OD, 25°C; on-line PDA UV spectrum in MeCN/H<sub>2</sub>O; ECD spectrum in MeOH



<sup>1</sup>H NS16 CD3OD 25°C – NS=16

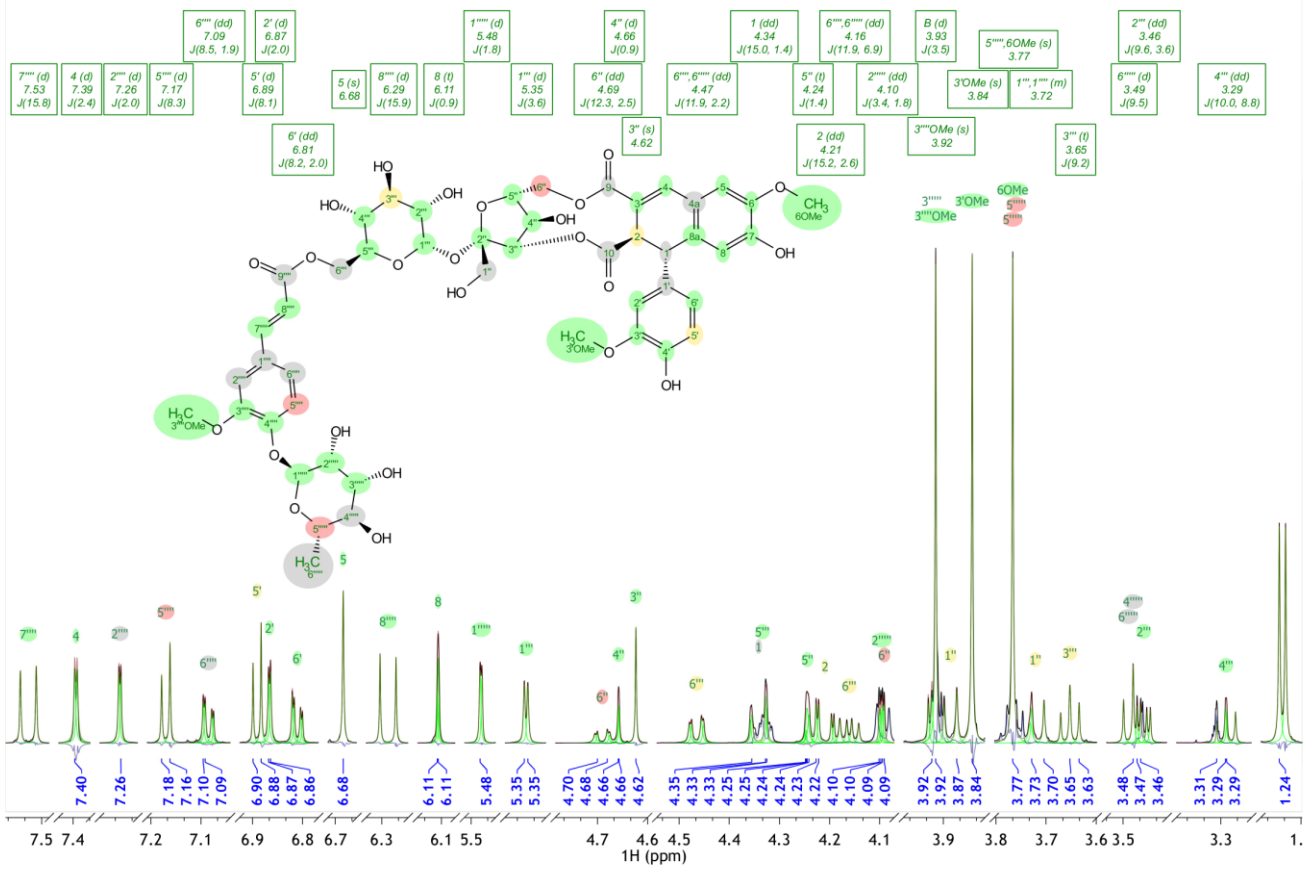

Figure 71S. <sup>1</sup>H NMR spectrum of compound 35

<sup>13</sup>C DEPT Q – NS=1024

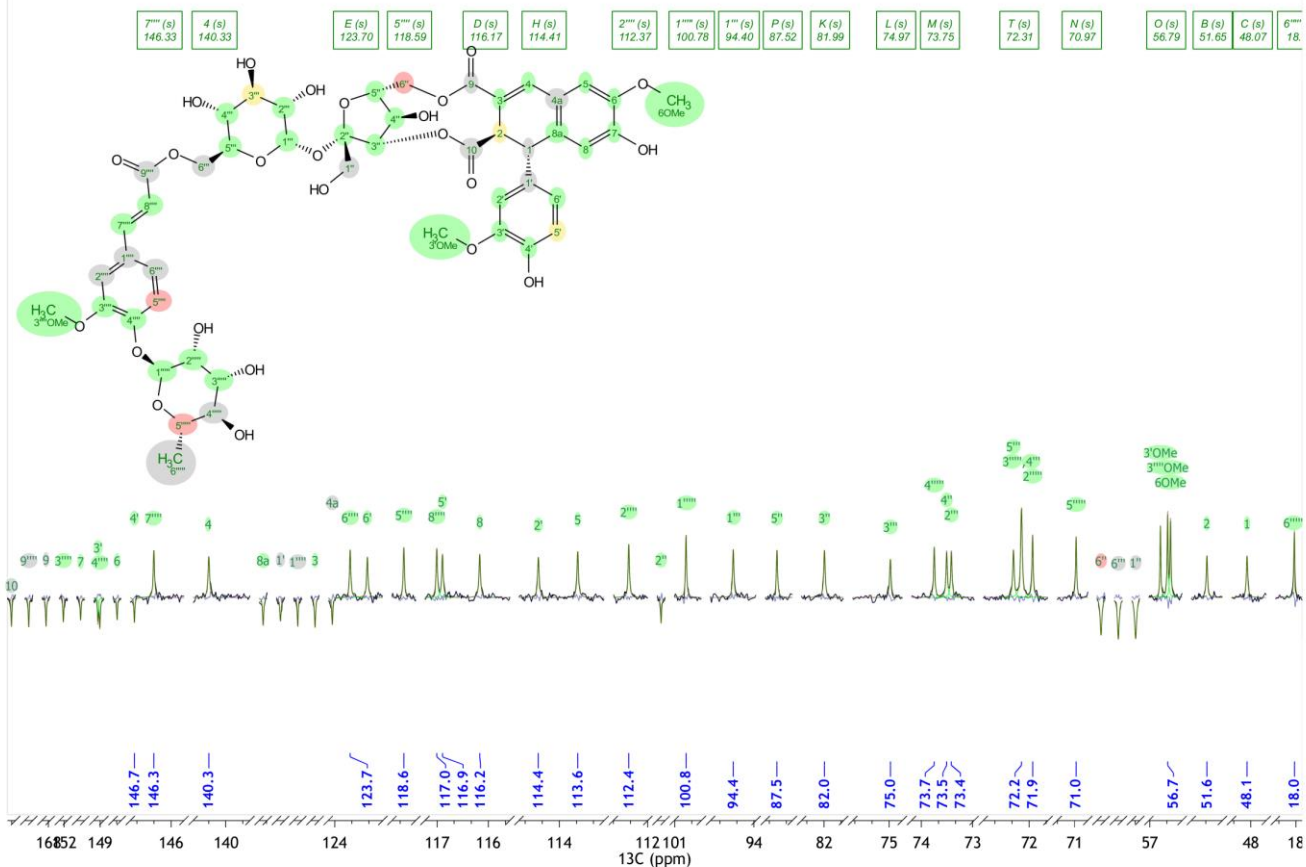

Figure 72S. <sup>13</sup>C DEPTQ NMR spectrum of compound 35

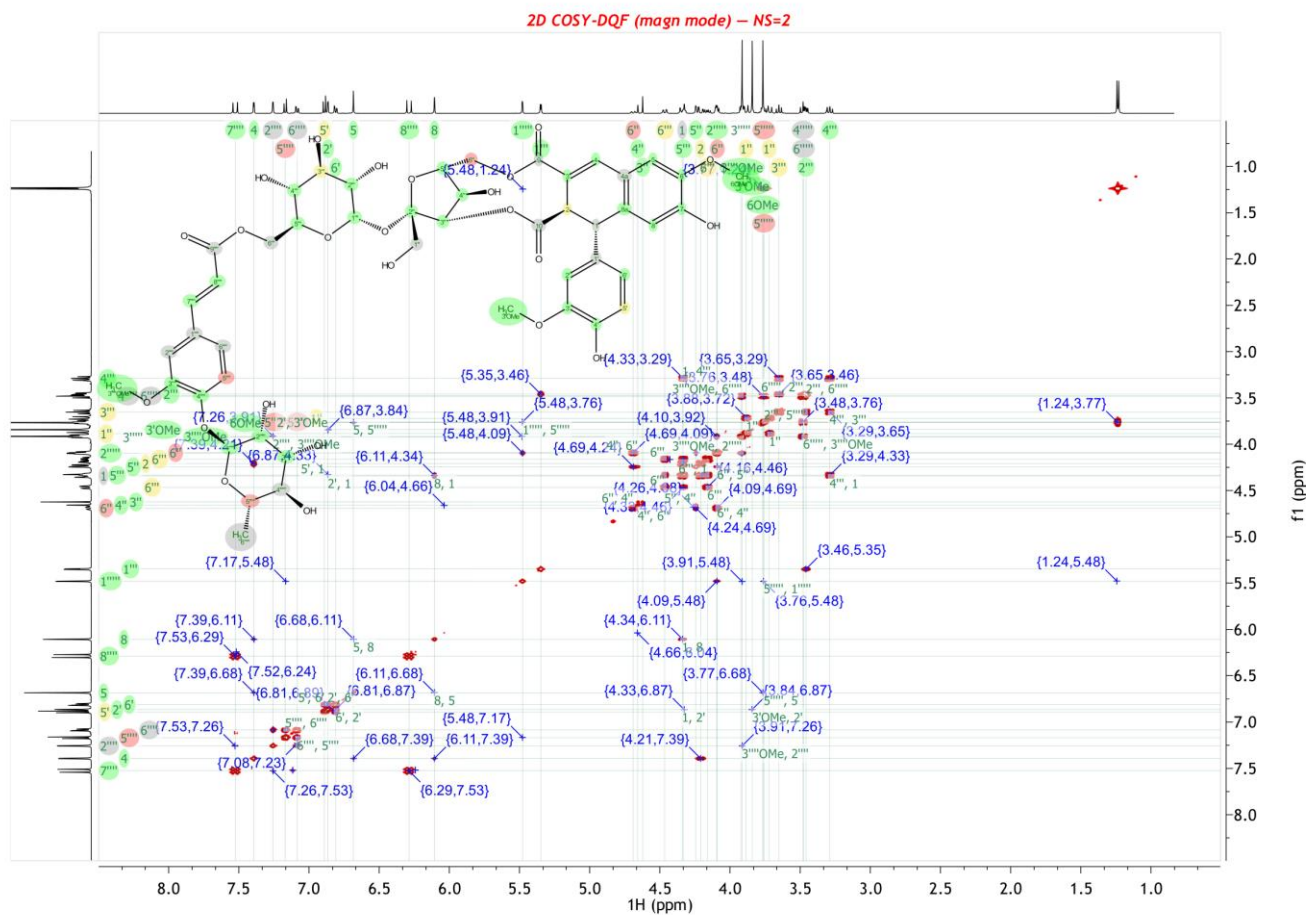

**Figure 73S.**  $^1\text{H}$ - $^1\text{H}$  COSY NMR spectrum of compound 35

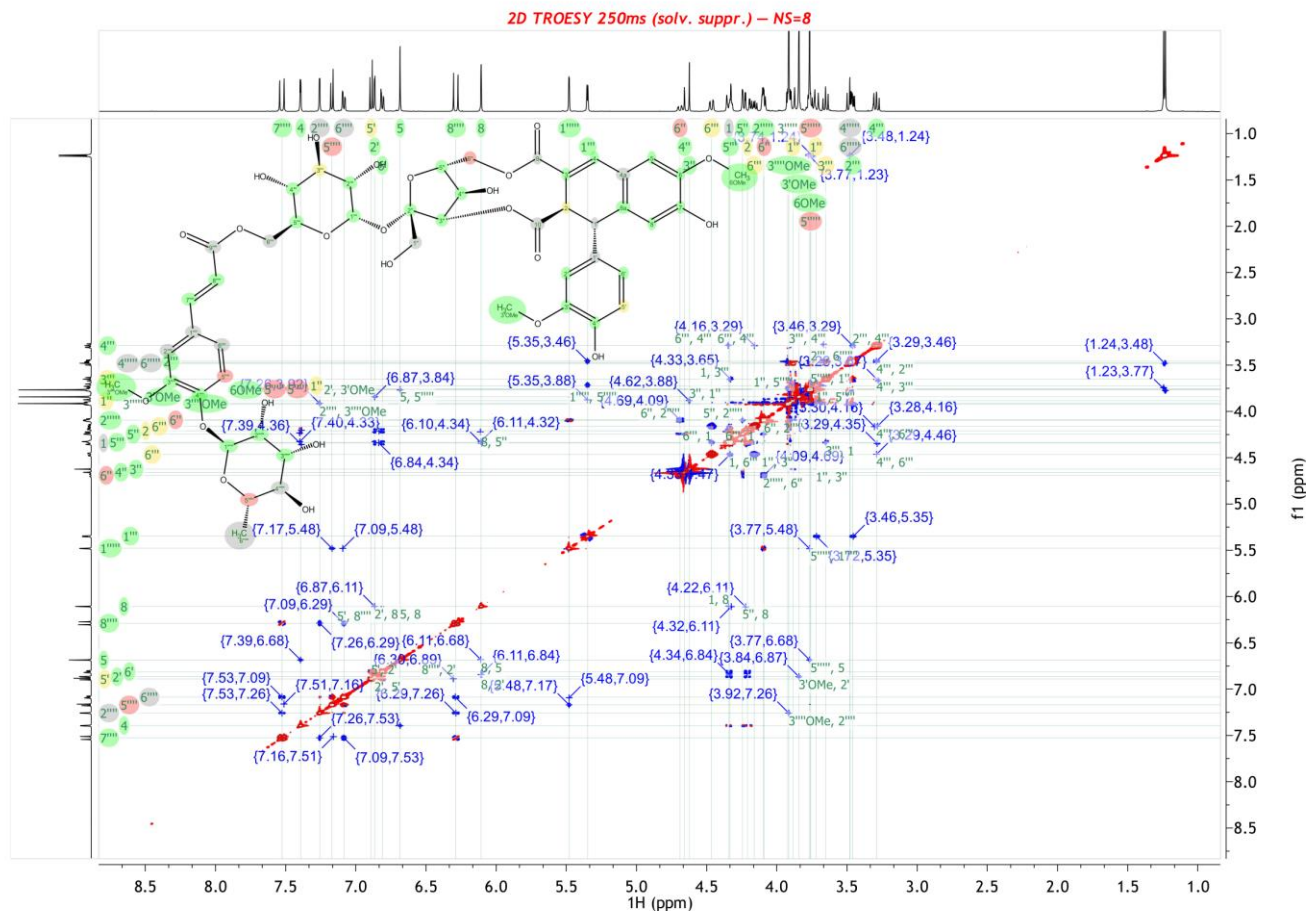

**Figure 74S.**  $^1\text{H}$ - $^1\text{H}$  TROESY (250 ms) NMR spectrum of compound 35

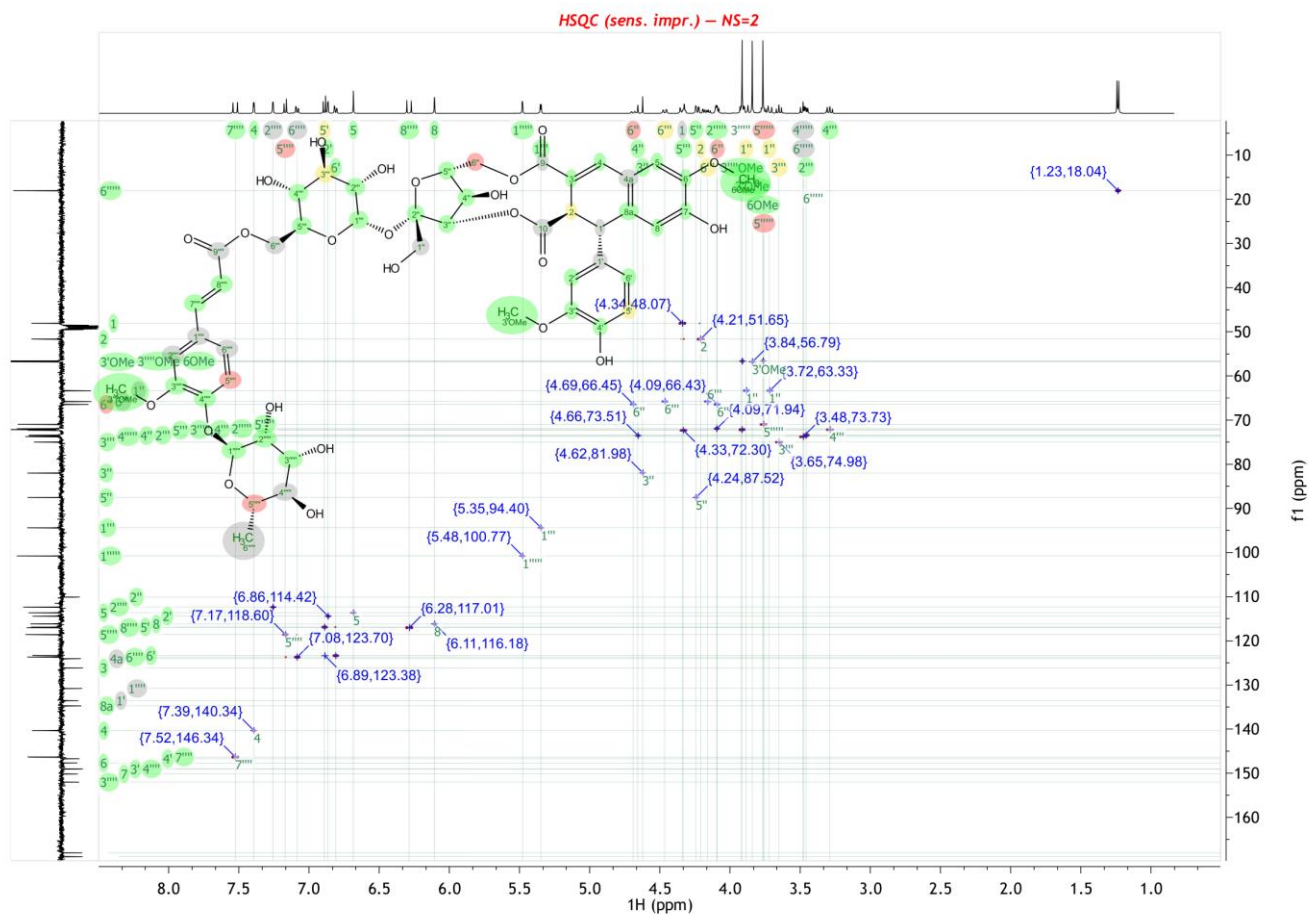

**Figure 75S.**  $^1\text{H}$ - $^{13}\text{C}$  HSQC NMR spectrum of compound 35

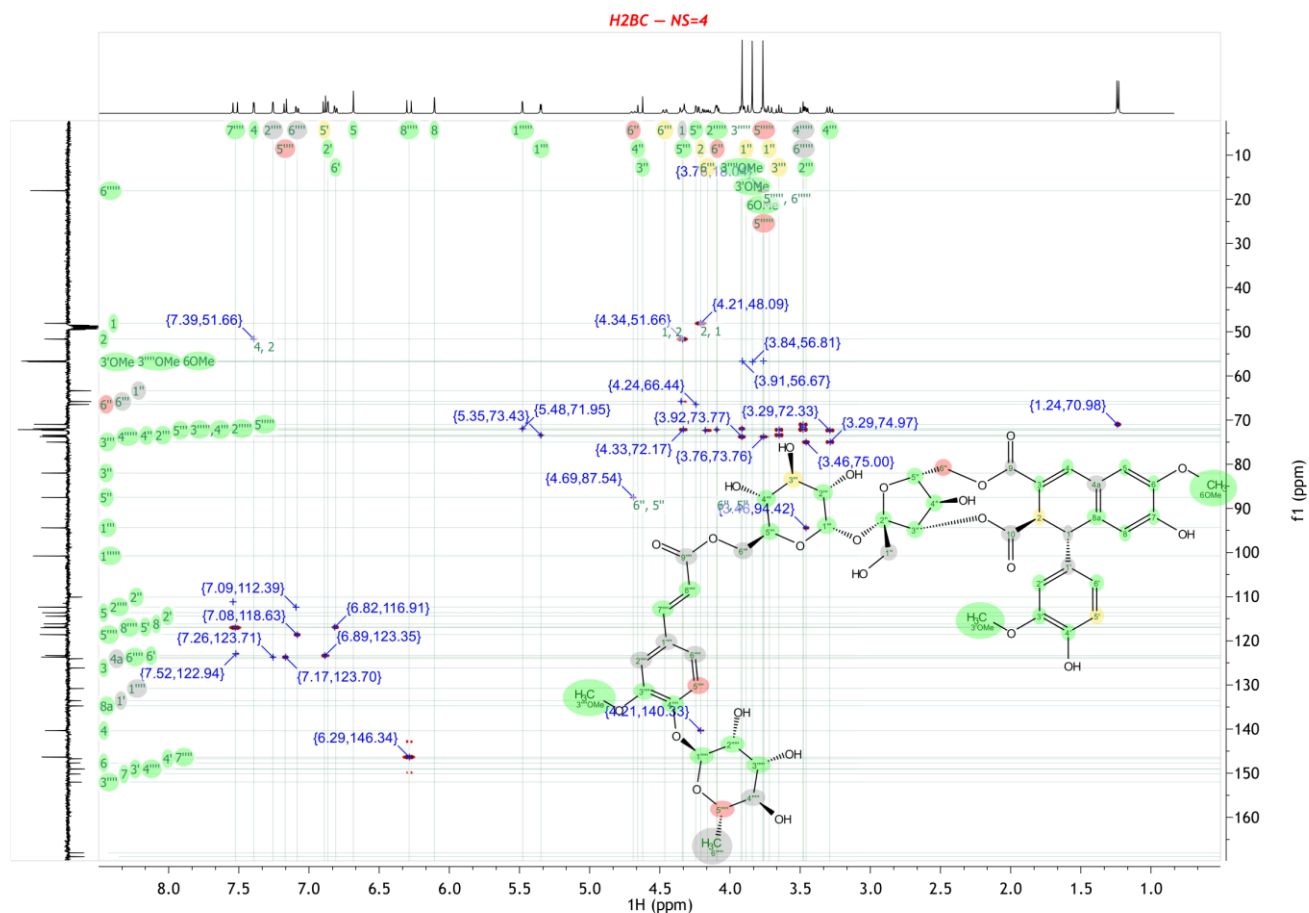

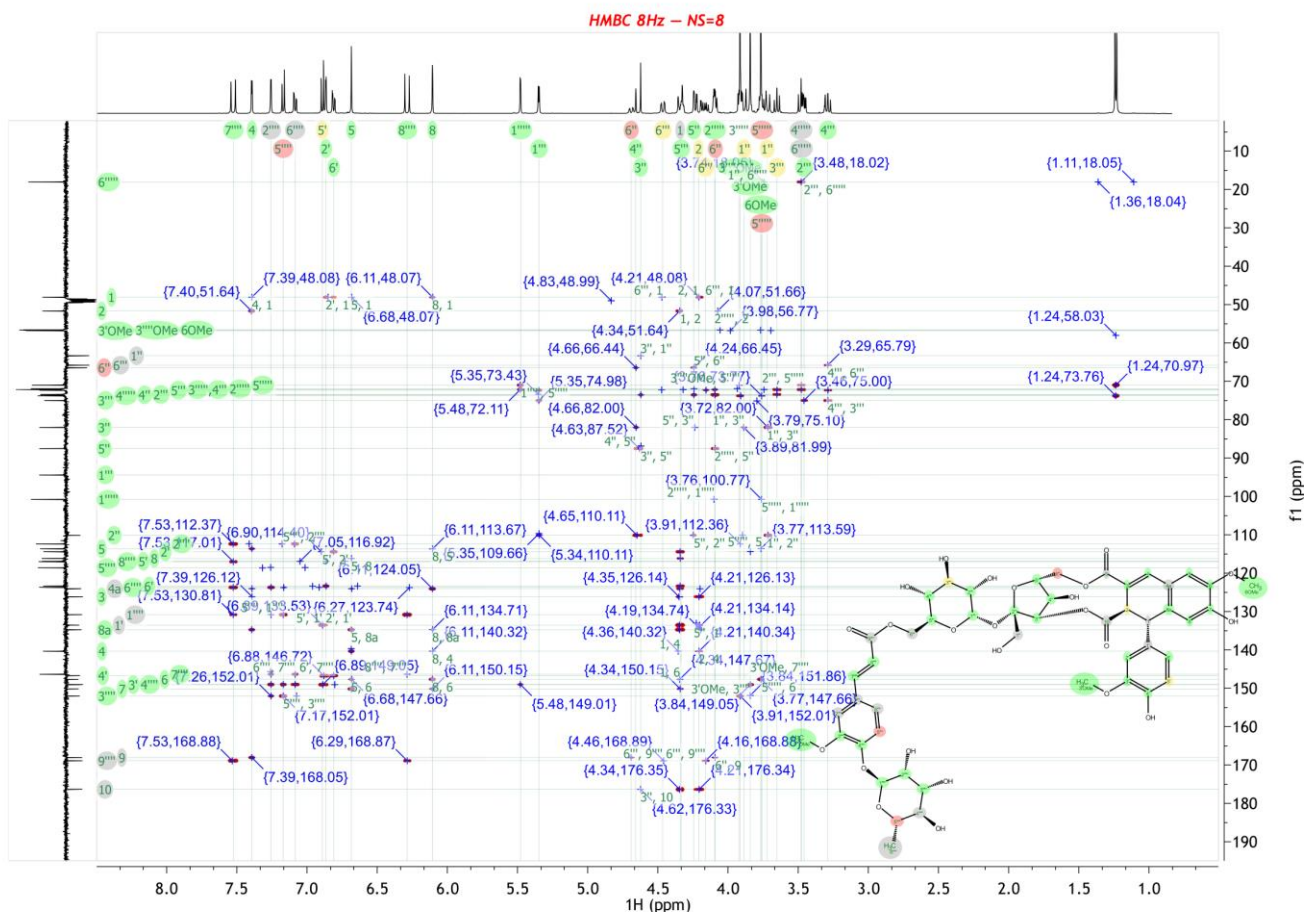

Figure 77S.  $^1\text{H}$ - $^{13}\text{C}$  HMBC (8 Hz) NMR spectrum of compound 35

**POAmz1093Fr\_I\_537czyste\_3**  
 Chemical Formula:  $\text{C}_{24}\text{H}_{46}\text{O}_{25}$   
 Molecular Weight: 1094.9370  
**KNOWN**

$[\alpha]_{25}^{\text{D}} = +92.7^\circ$  (c 1.22, MeOH, exp. our lab)  
 $[\alpha]_{\text{D}}^{\text{D}} = +80.5^\circ$  (c unk, MeOH)

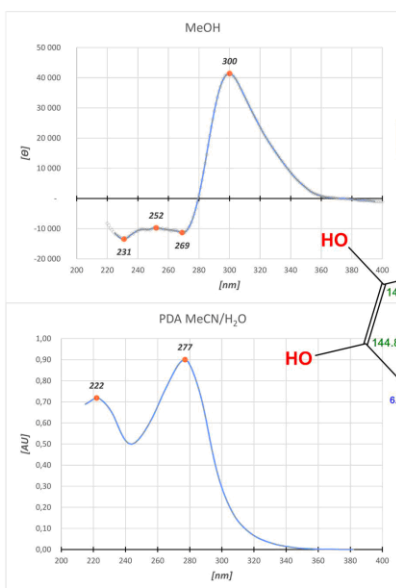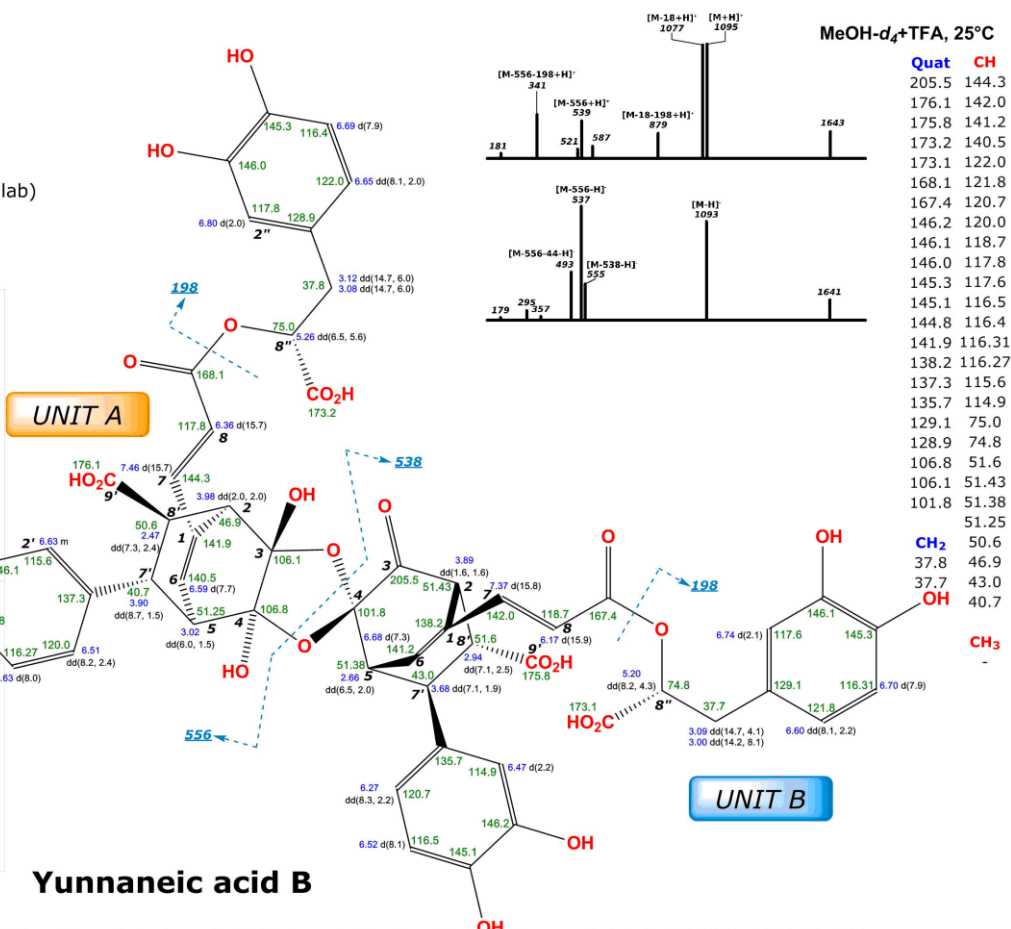

1. Tanaka, T., Nishimura, A., Kouno, I., Nonaka, G.I., Young, T.J., 1996. Isolation and characterization of yunnaneic acids A-D, four novel caffeic acid metabolites from *Salvia yunnanensis*. *J. Nat. Prod.* 59, 843-849. doi:10.1021/np960425s  
 2. Yan, X., 2015. Dan Shen (*Salvia miltiorrhiza*) in Medicine. Springer Netherlands, Dordrecht. doi:10.1007/978-94-017-9463-3

Figure 78S.  $^1\text{H}$  (500 MHz) and  $^{13}\text{C}$  (125 MHz) NMR data of compound 36 in  $\text{CD}_3\text{OD}$ , 25°C; on-line PDA UV spectrum in MeCN/ $\text{H}_2\text{O}$ ; ECD spectrum in MeOH

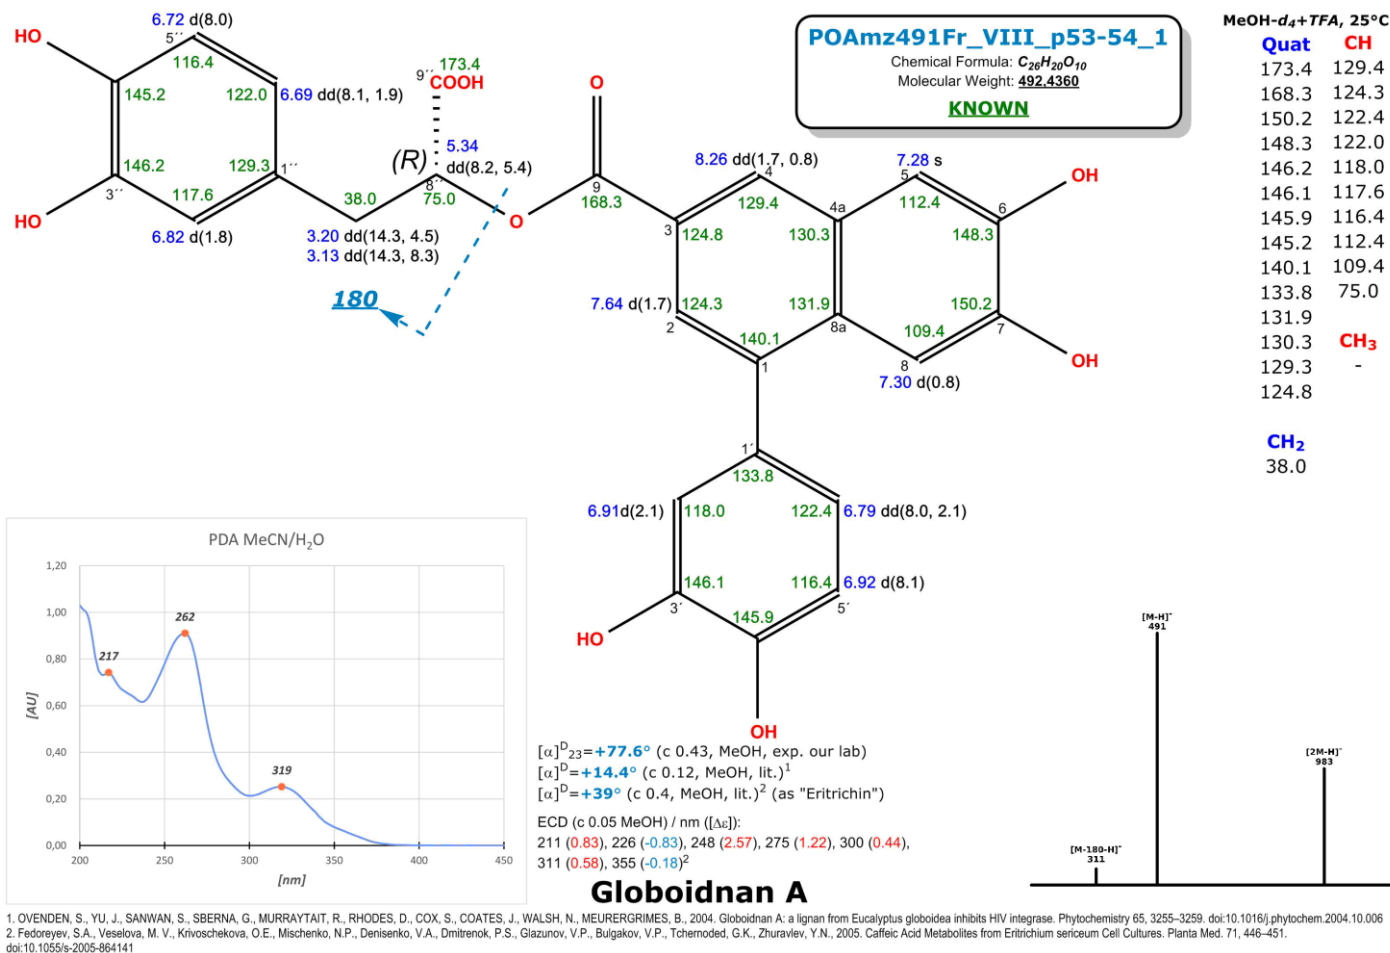

**Figure 79S.**  $^1\text{H}$  (500 MHz) and  $^{13}\text{C}$  (125 MHz) NMR data of compound 37 in  $\text{CD}_3\text{OD}$ , 25°C; on-line PDA UV spectrum in MeCN/H<sub>2</sub>O

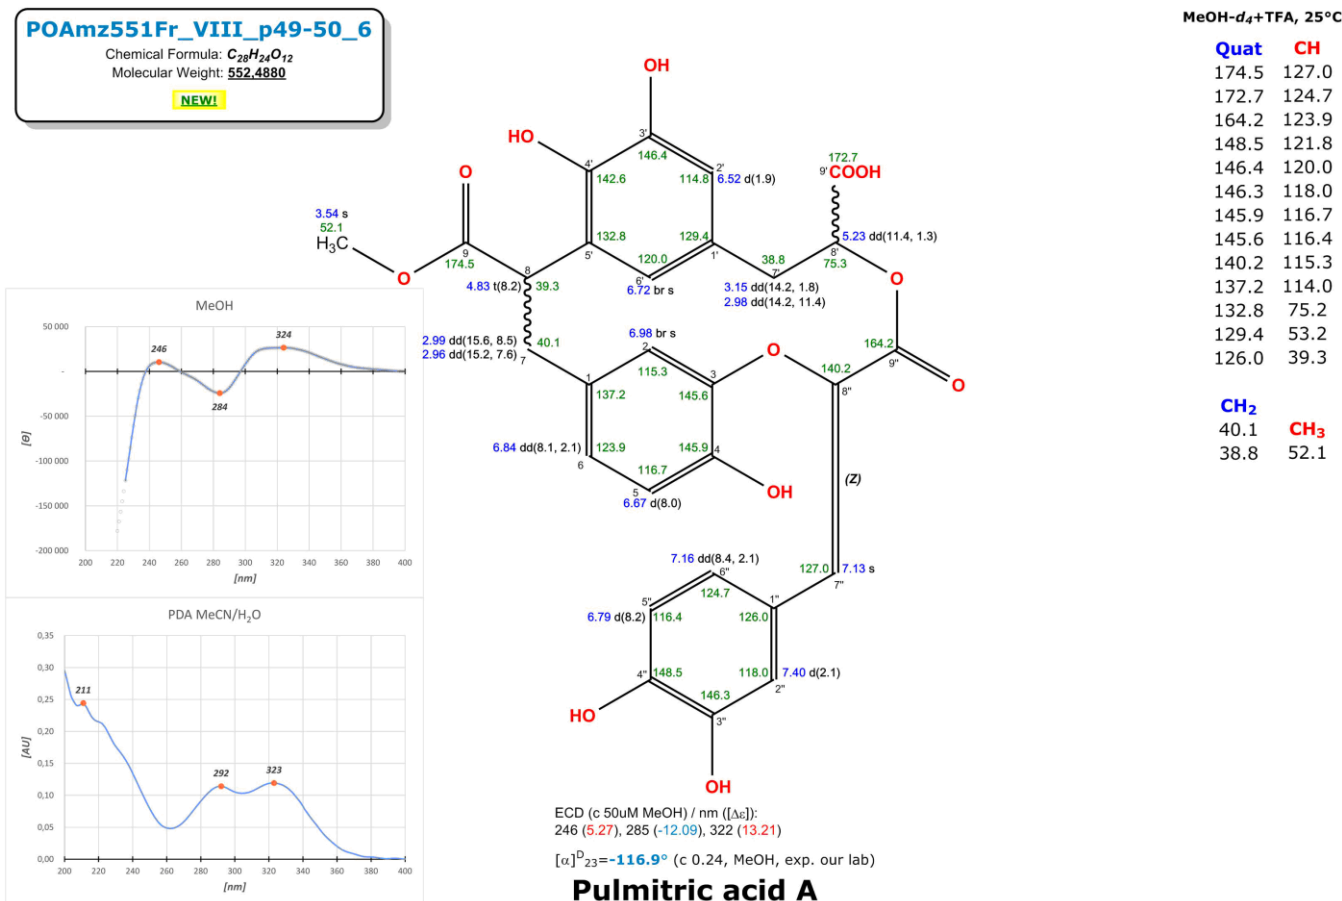

**Figure 80S.**  $^1\text{H}$  (500 MHz) and  $^{13}\text{C}$  (125 MHz) NMR data of compound 38 in  $\text{CD}_3\text{OD}$ , 25°C; on-line PDA UV spectrum in MeCN/H<sub>2</sub>O

- NS=8

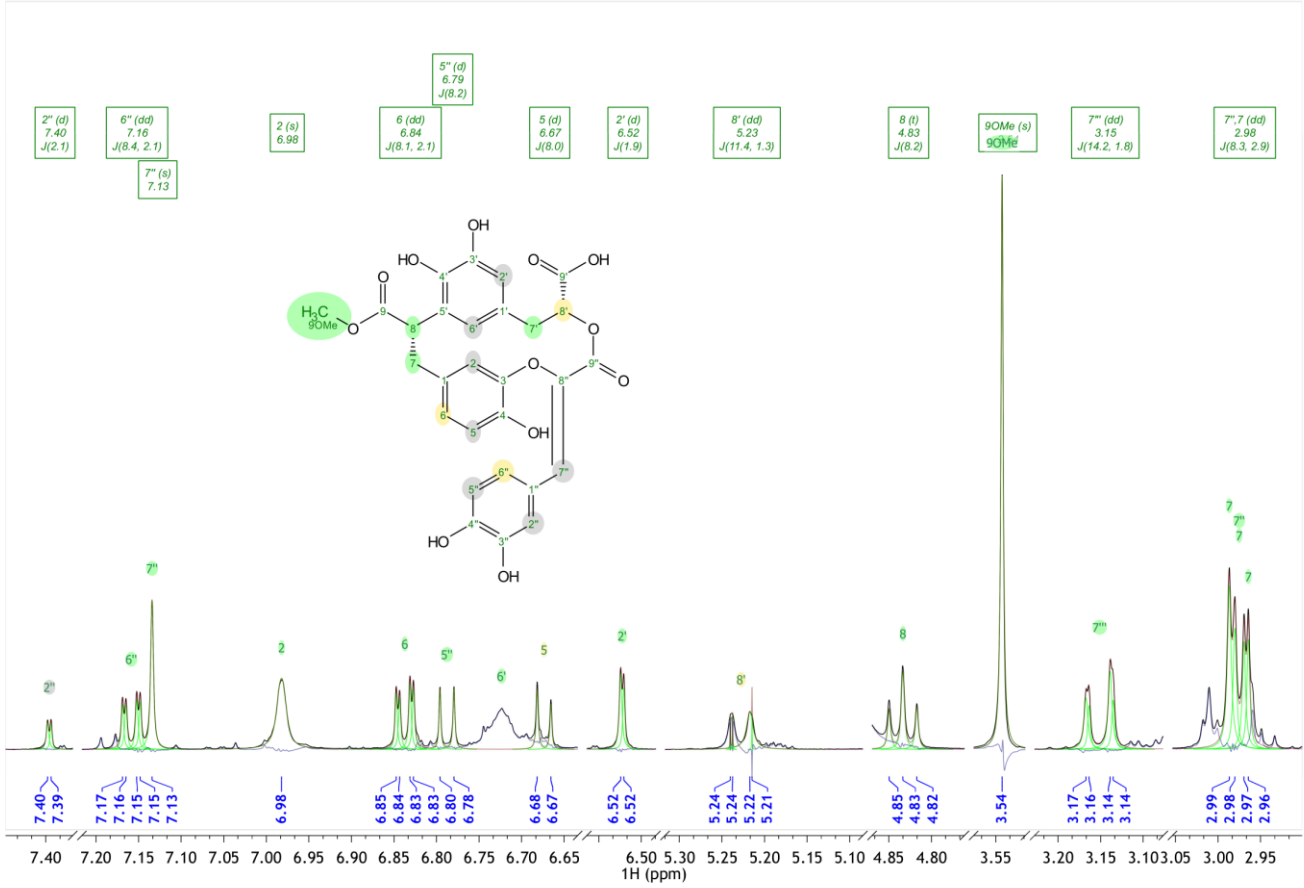

Figure 81S. <sup>1</sup>H NMR spectrum of compound 38

<sup>13</sup>C DEPT Q - NS=8192

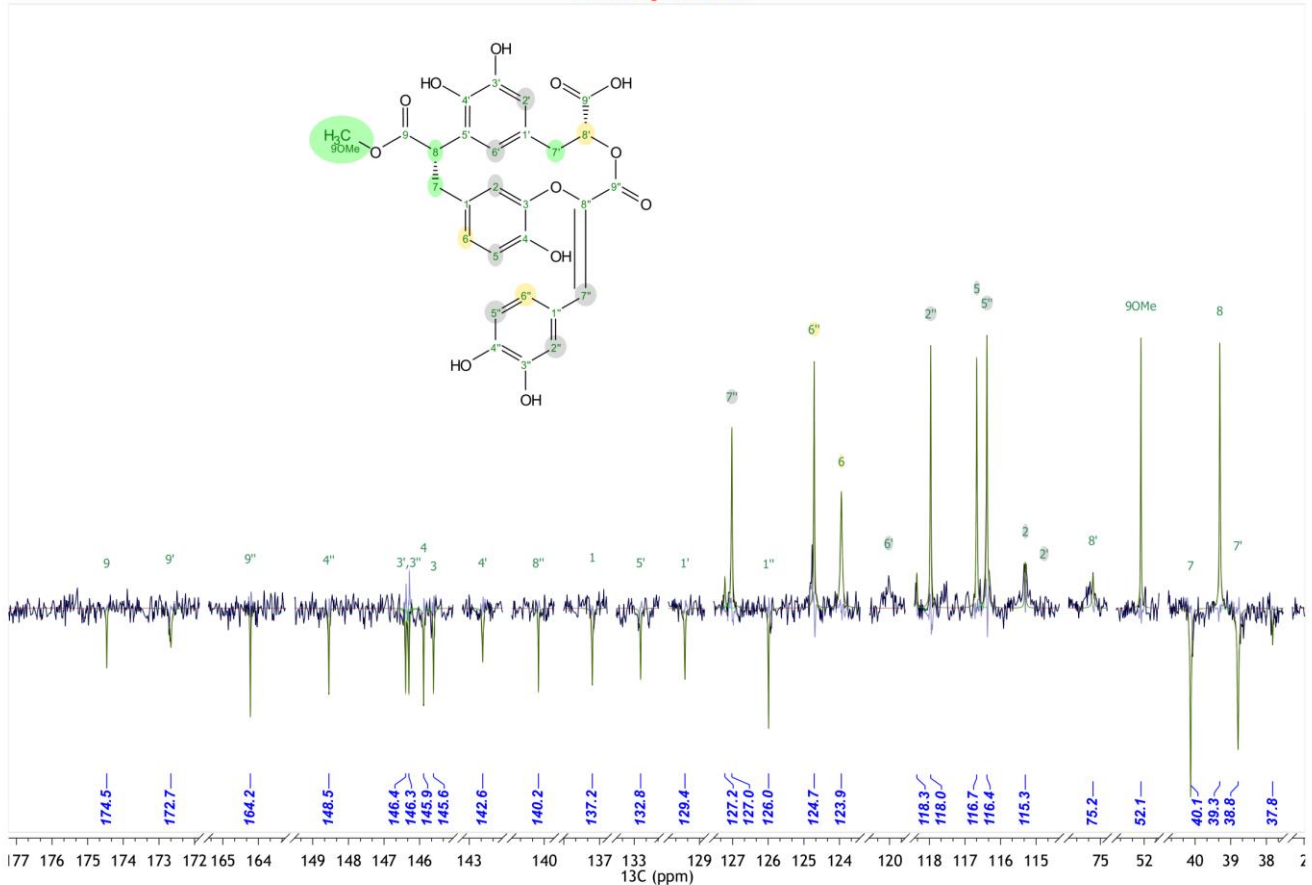

Figure 82S. <sup>13</sup>C DEPTQ NMR spectrum of compound 38

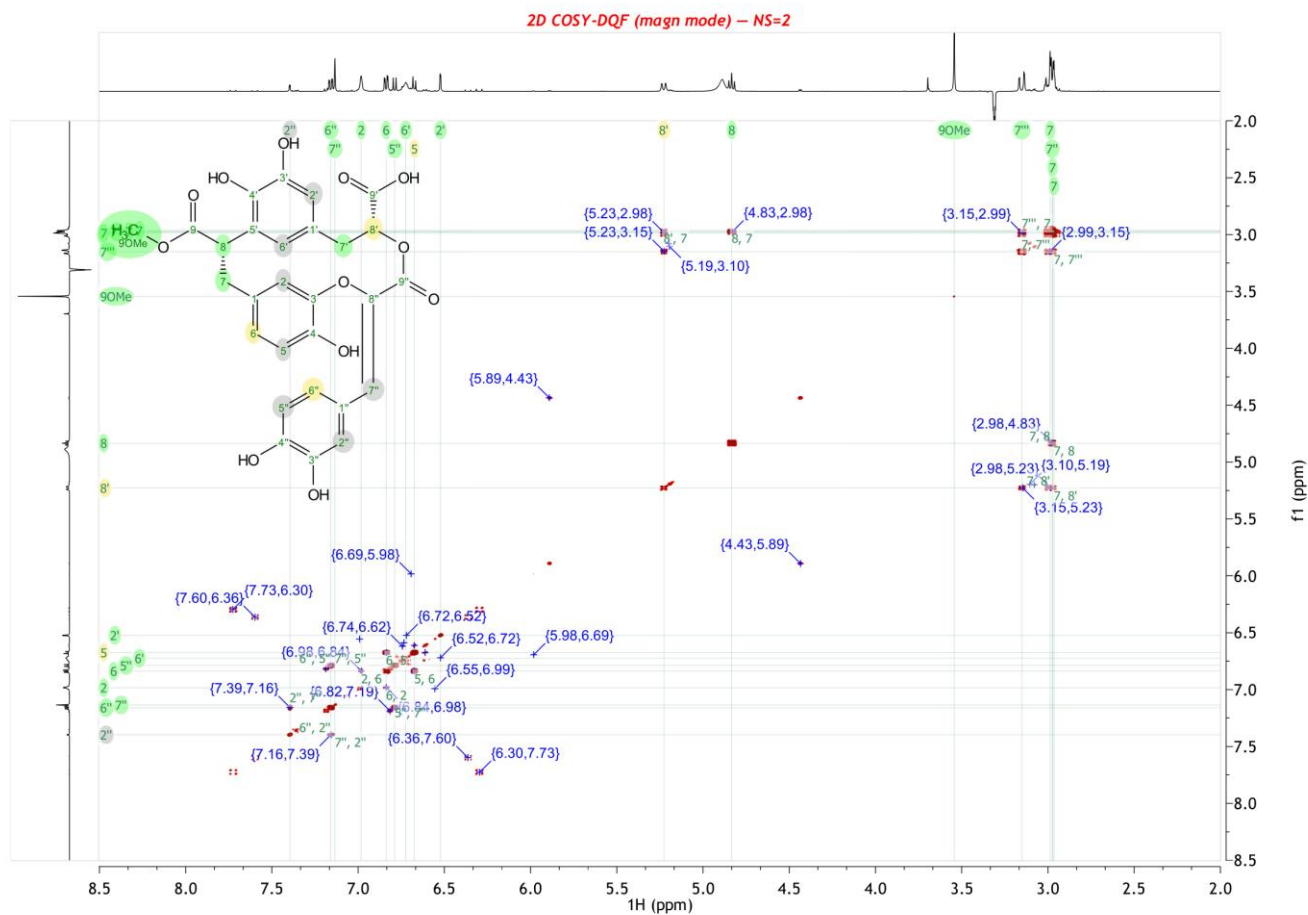

**Figure 83S.**  $^1\text{H}$ - $^1\text{H}$  COSY NMR spectrum of compound 38

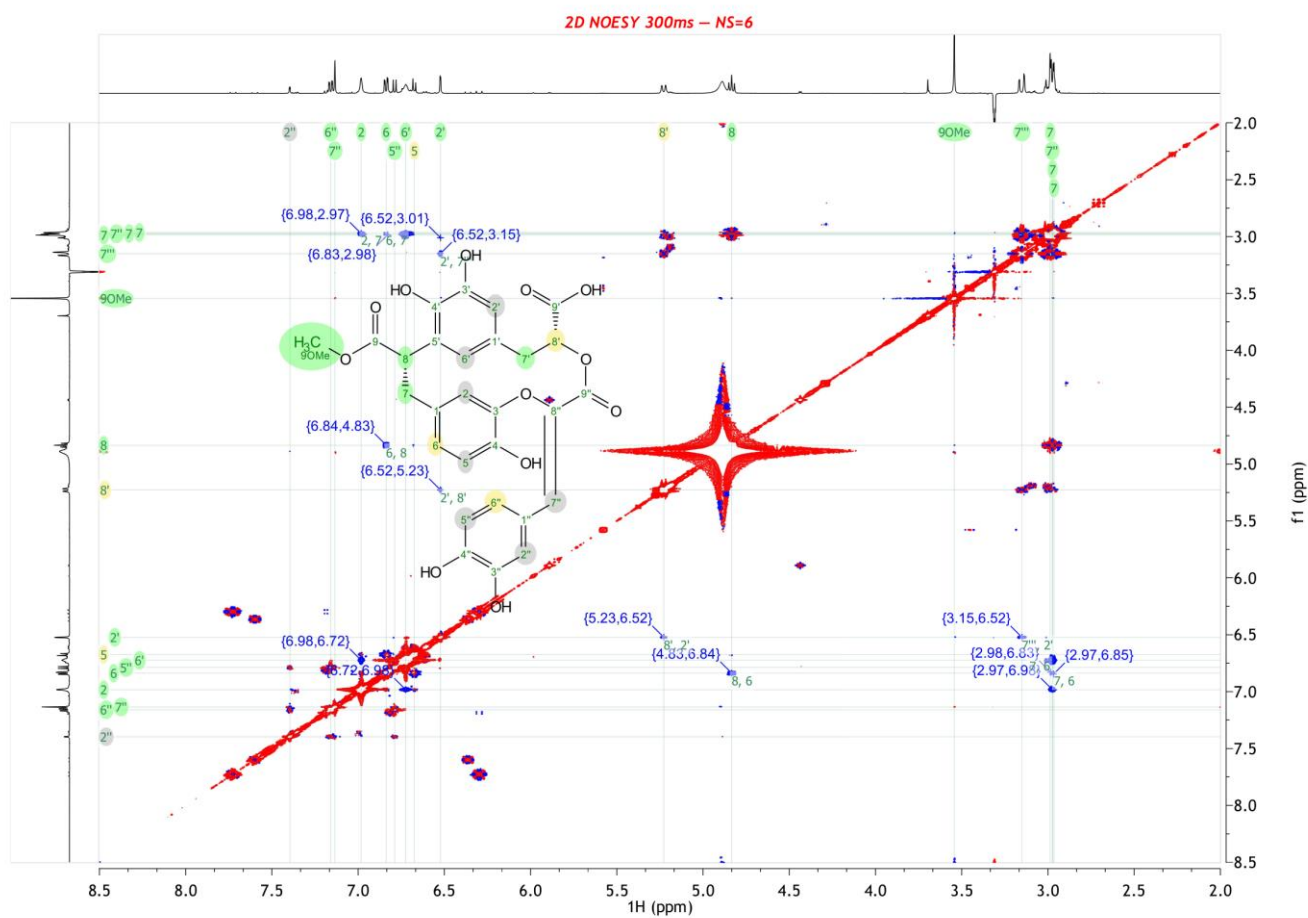

**Figure 84S.**  $^1\text{H}$ - $^1\text{H}$  NOESY (300 ms) NMR spectrum of compound 38

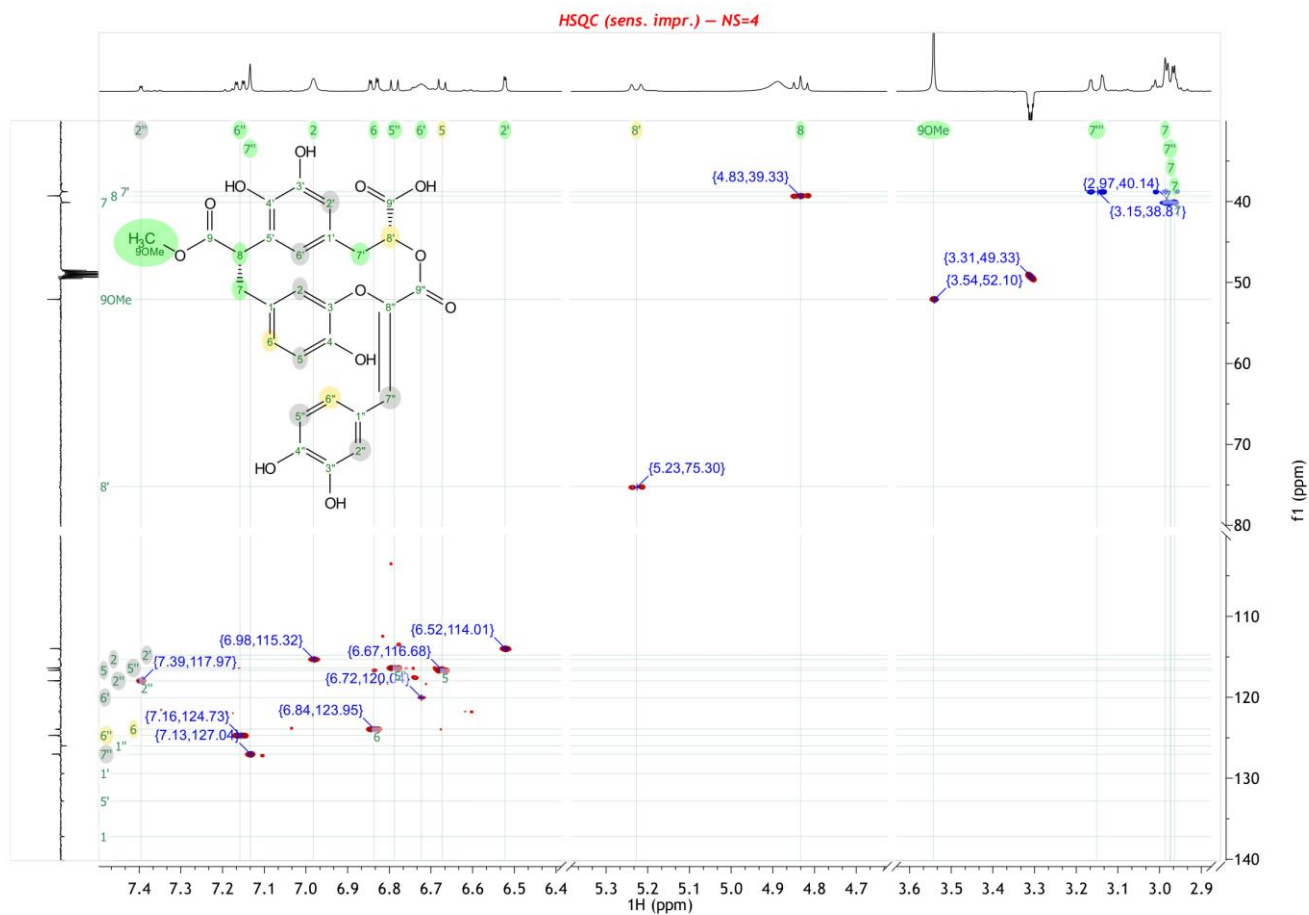

**Figure 85S.**  $^1\text{H}$ - $^{13}\text{C}$  HSQC NMR spectrum of compound 38

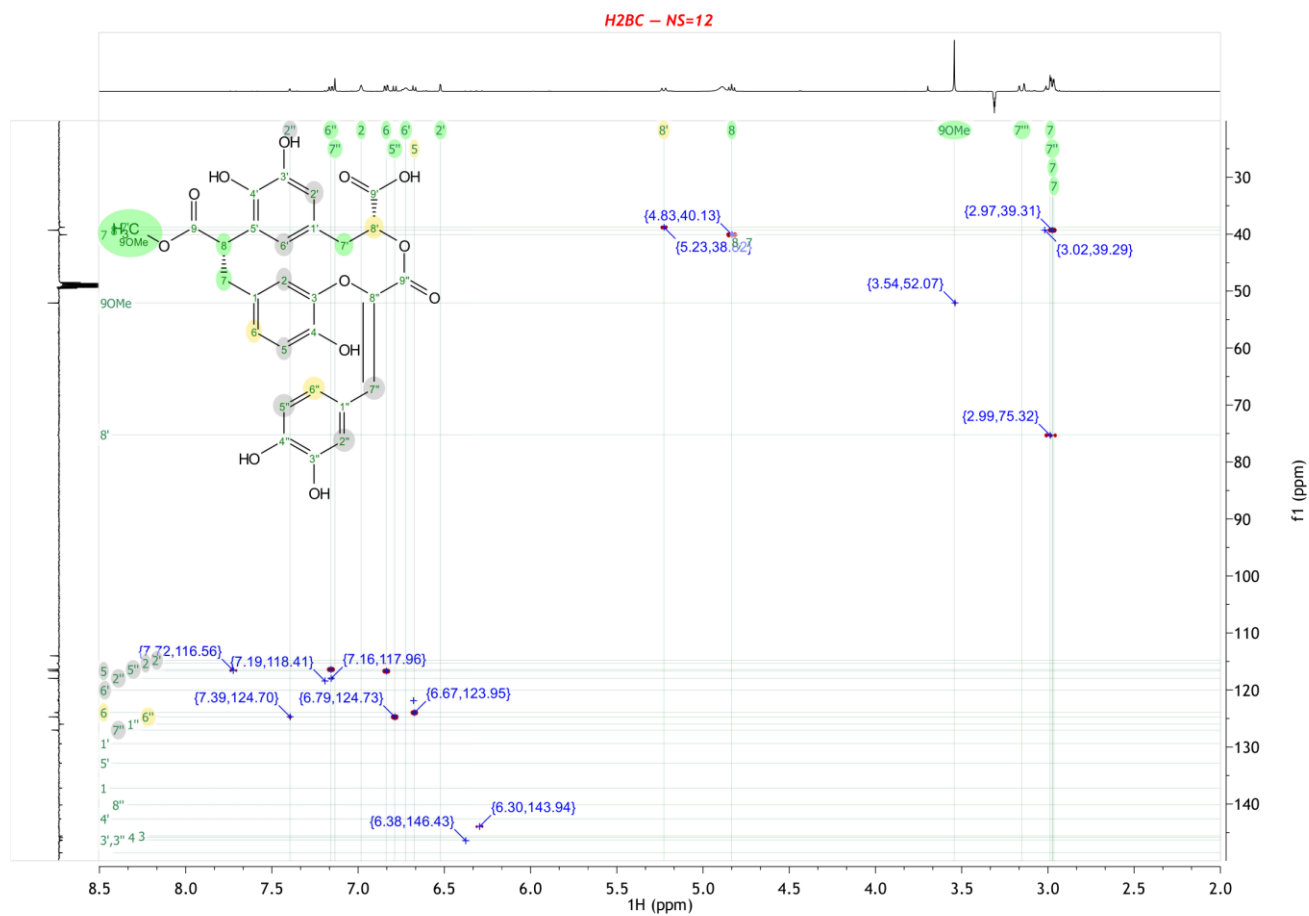

**Figure 86S.**  $^1\text{H}$ - $^{13}\text{C}$  H2BC NMR spectrum of compound 38



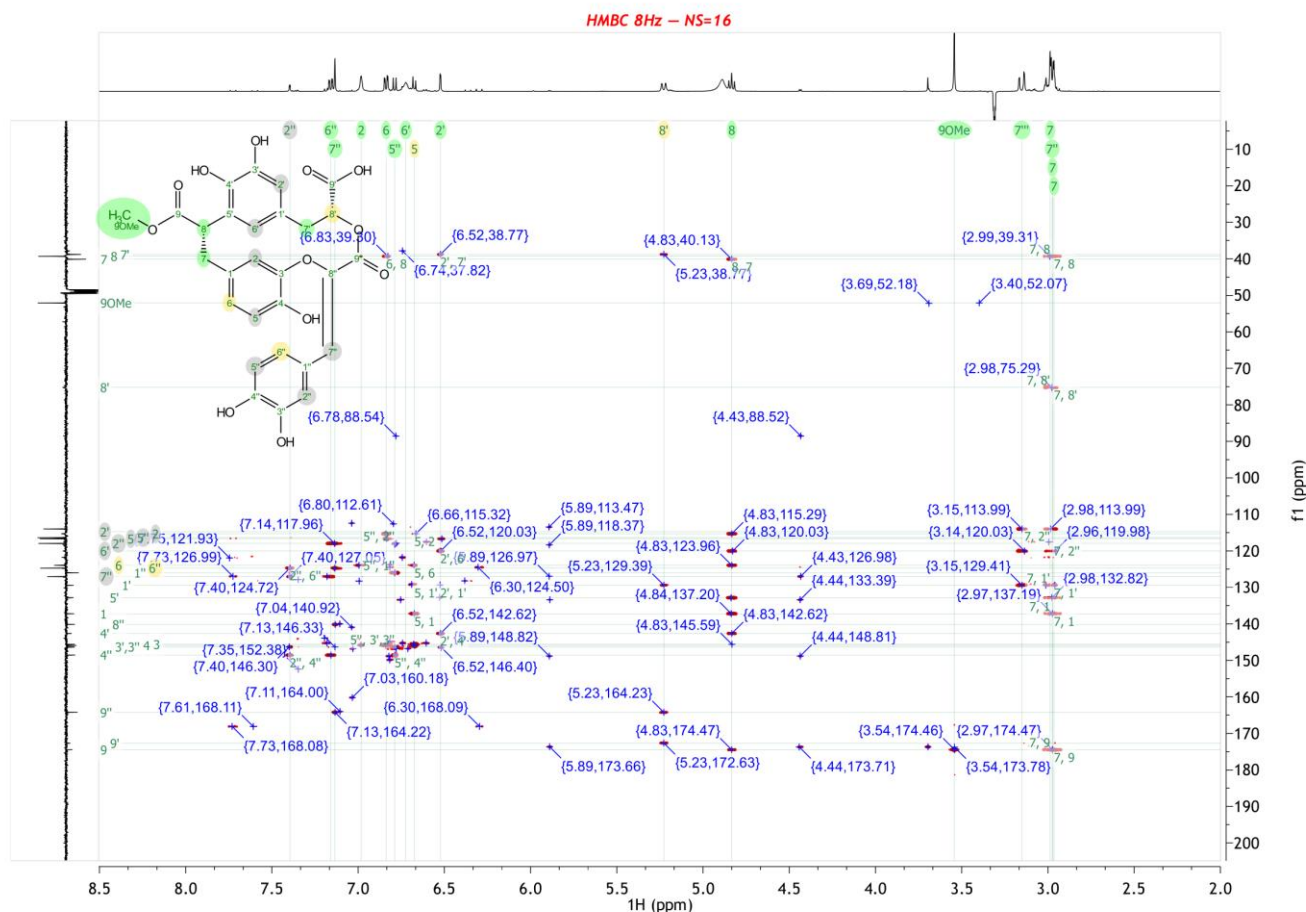

**Figure 87S.**  $^1\text{H}$ - $^{13}\text{C}$  HMBC (8 Hz) NMR spectrum of compound 38

**POAmz535Fr\_VIII\_p51-52\_2**  
 Chemical Formula:  $\text{C}_{27}\text{H}_{20}\text{O}_{12}$   
 Molecular Weight: **536.4450**  
**NEW!**

MeOH- $d_4$ +TFA, 25°C

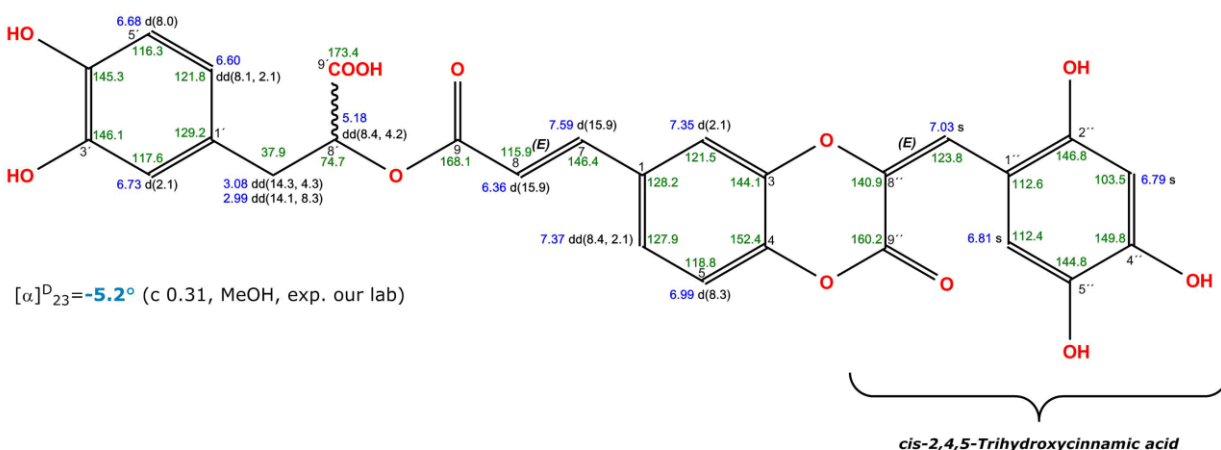

| Quat  | CH                    |
|-------|-----------------------|
| 173.4 | 146.4                 |
| 168.1 | 127.9                 |
| 160.2 | 123.8                 |
| 152.4 | 121.8                 |
| 149.8 | 121.5                 |
| 146.8 | 118.8                 |
| 146.1 | 117.6                 |
| 145.3 | 116.3                 |
| 144.8 | 115.9                 |
| 144.1 | 112.4                 |
| 140.9 | 103.5                 |
| 129.2 | 74.7                  |
| 128.2 |                       |
| 112.6 |                       |
|       | <b>CH<sub>3</sub></b> |
|       | <b>CH<sub>2</sub></b> |
| 37.9  | -                     |

$[\alpha]_{23}^D = -5.2^\circ$  (c 0.31, MeOH, exp. our lab)

**Pulmitric acid B**

1. Murata, T., Watahiki, M., Tanaka, Y., Miyase, T., Yoshizaki, F., 2010. Hyaluronidase Inhibitors from Takuran, *Lycopus lucidus*. Chem. Pharm. Bull. (Tokyo). 58, 394-397. doi:10.1248/cpb.58.394

**Figure 88S.**  $^1\text{H}$  (500 MHz) and  $^{13}\text{C}$  (125 MHz) NMR data of compound 39 in  $\text{CD}_3\text{OD}$ , 25°C

<sup>1</sup>H solv sup – NS=16

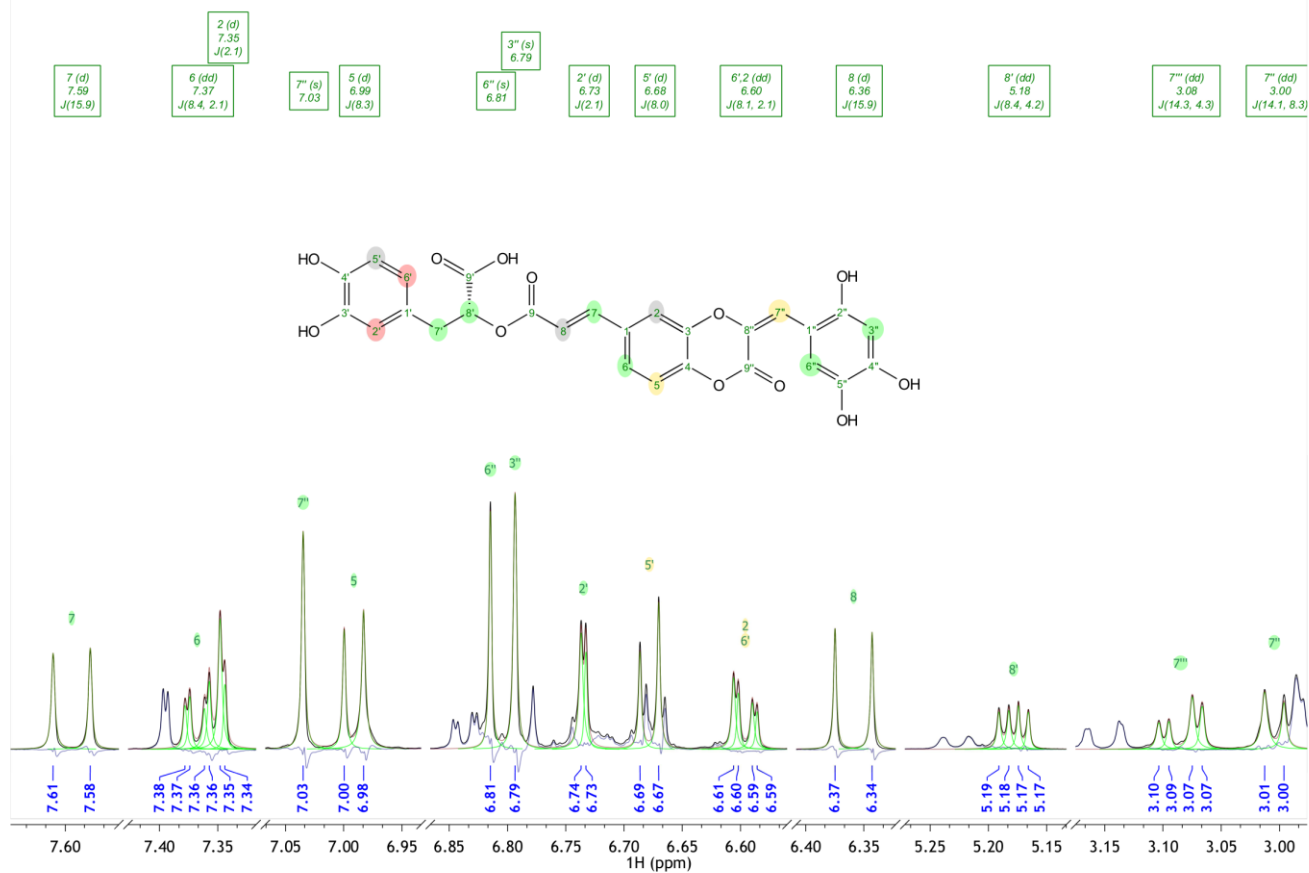

Figure 89S. <sup>1</sup>H NMR spectrum of compound 39

<sup>13</sup>C DEPT Q – NS=4096

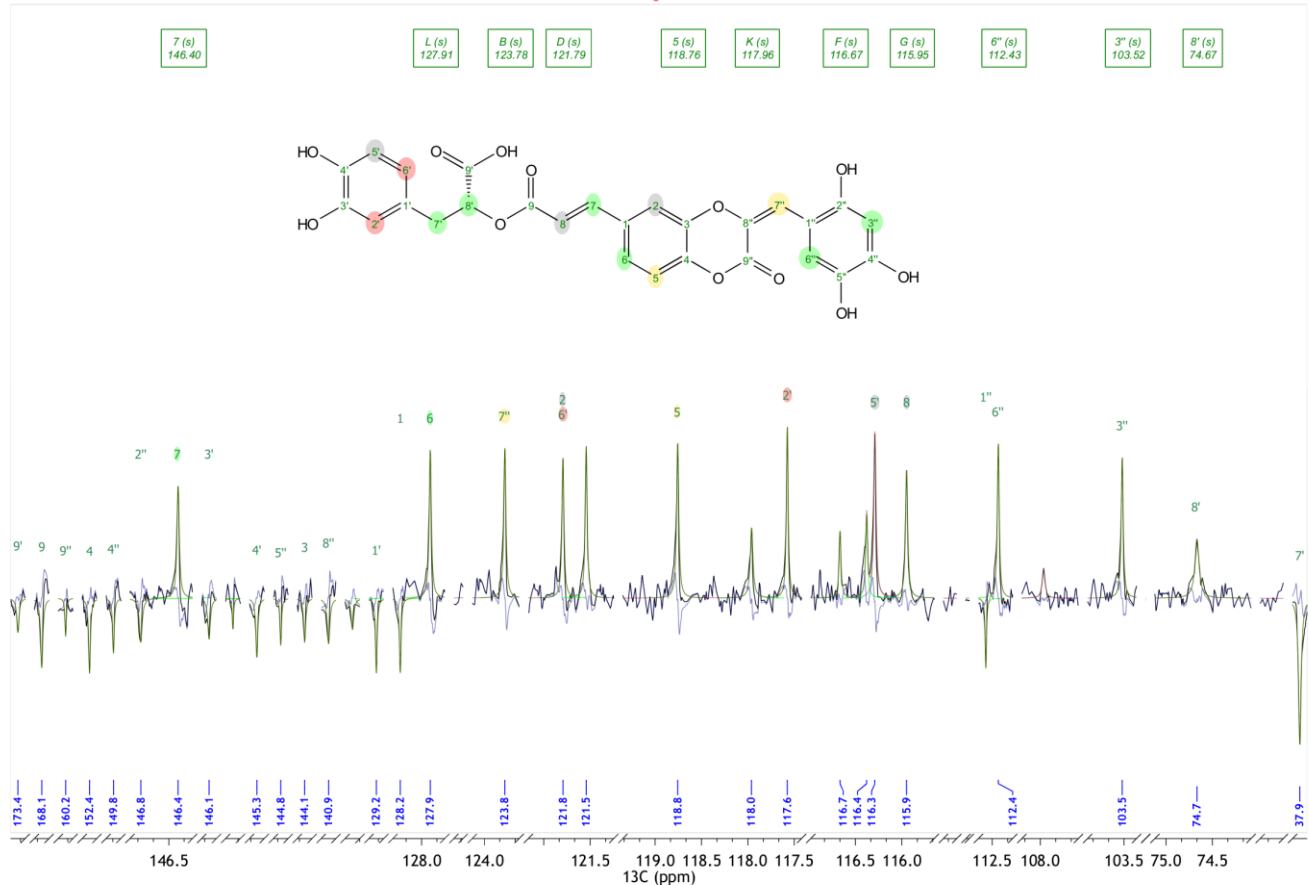

Figure 90S. <sup>13</sup>C DEPTQ NMR spectrum of compound 39

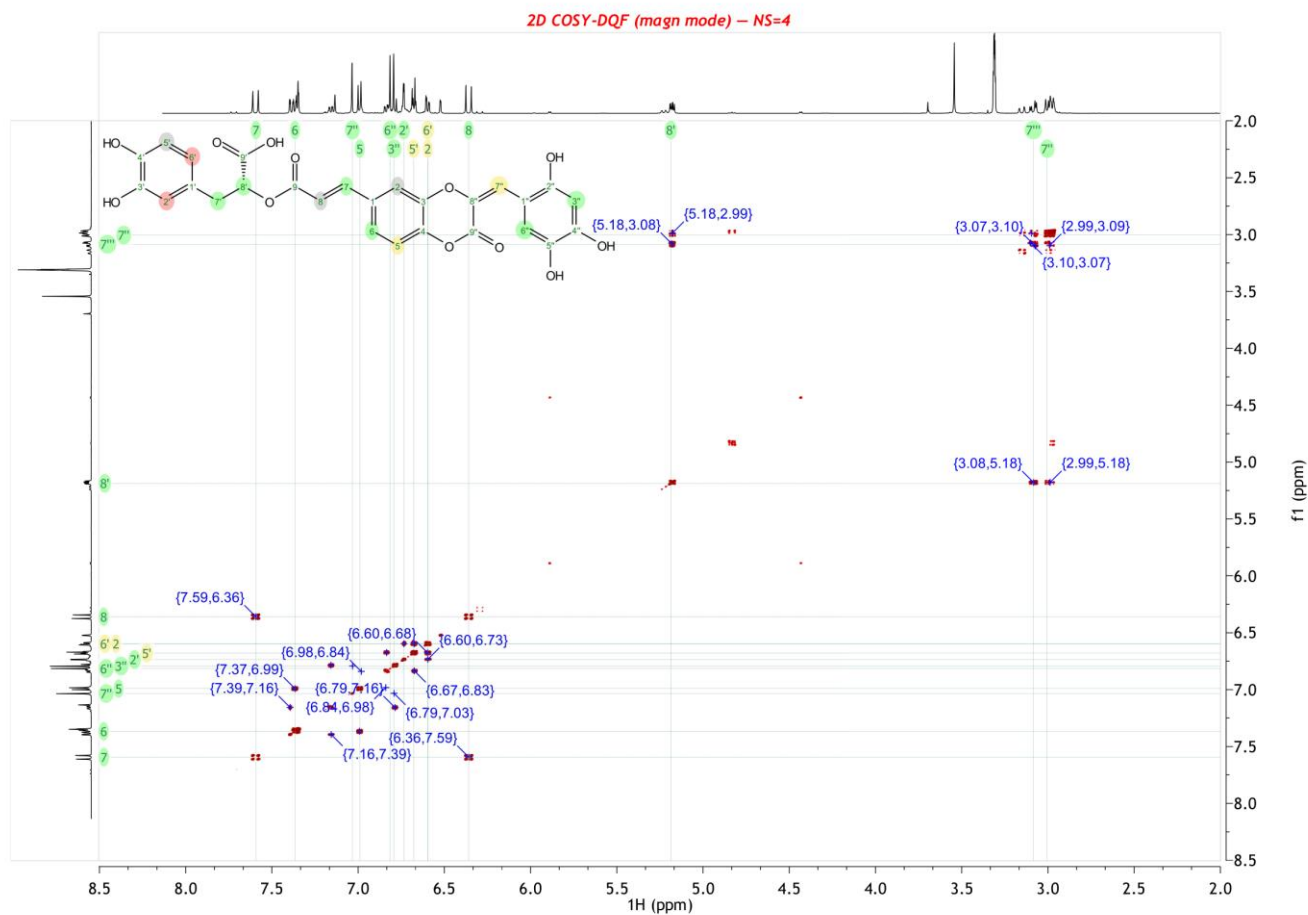

**Figure 91S.**  $^1\text{H}$ - $^1\text{H}$  COSY NMR spectrum of compound 39

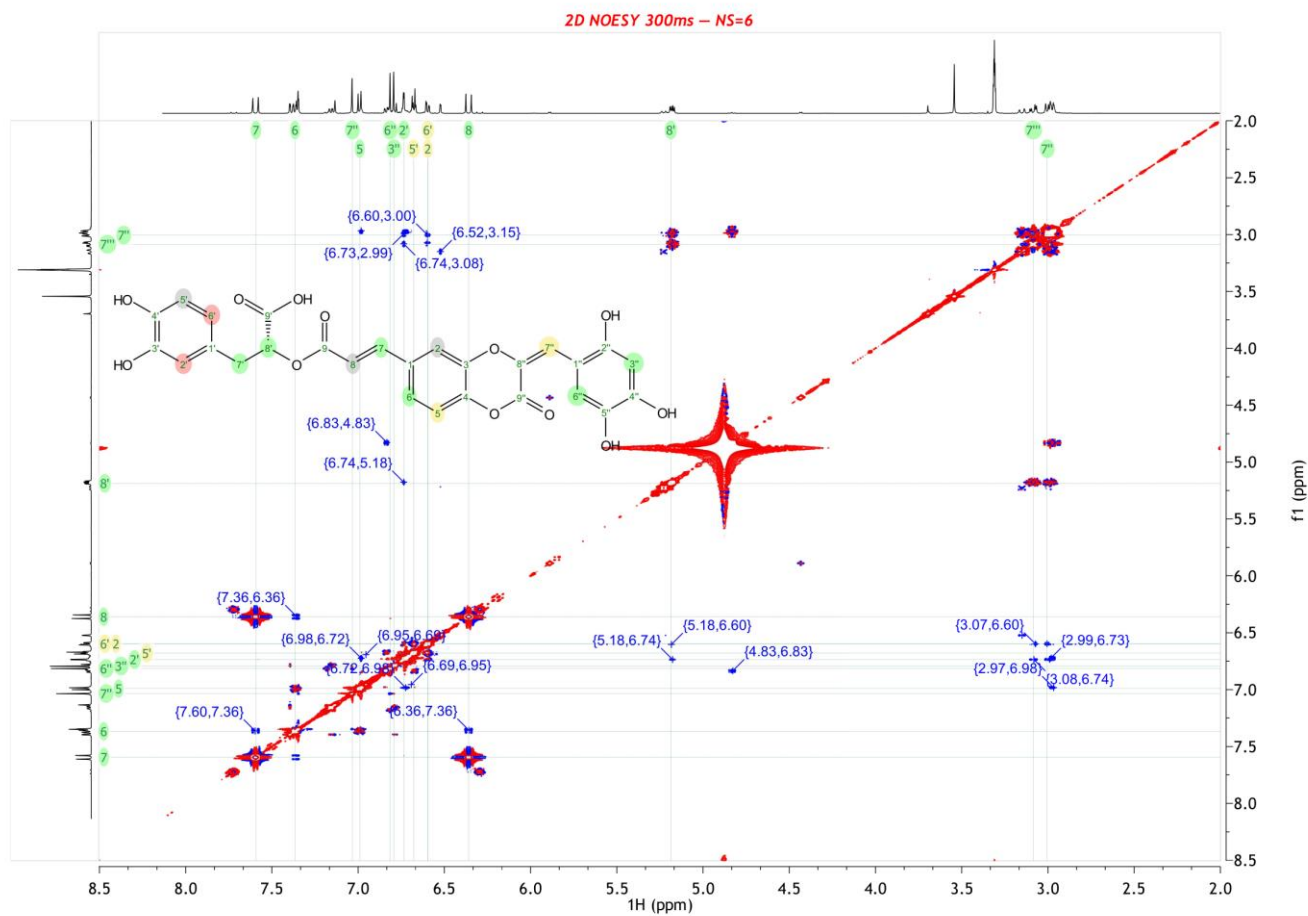

**Figure 92S.**  $^1\text{H}$ - $^1\text{H}$  NOESY (300 ms) NMR spectrum of compound 39

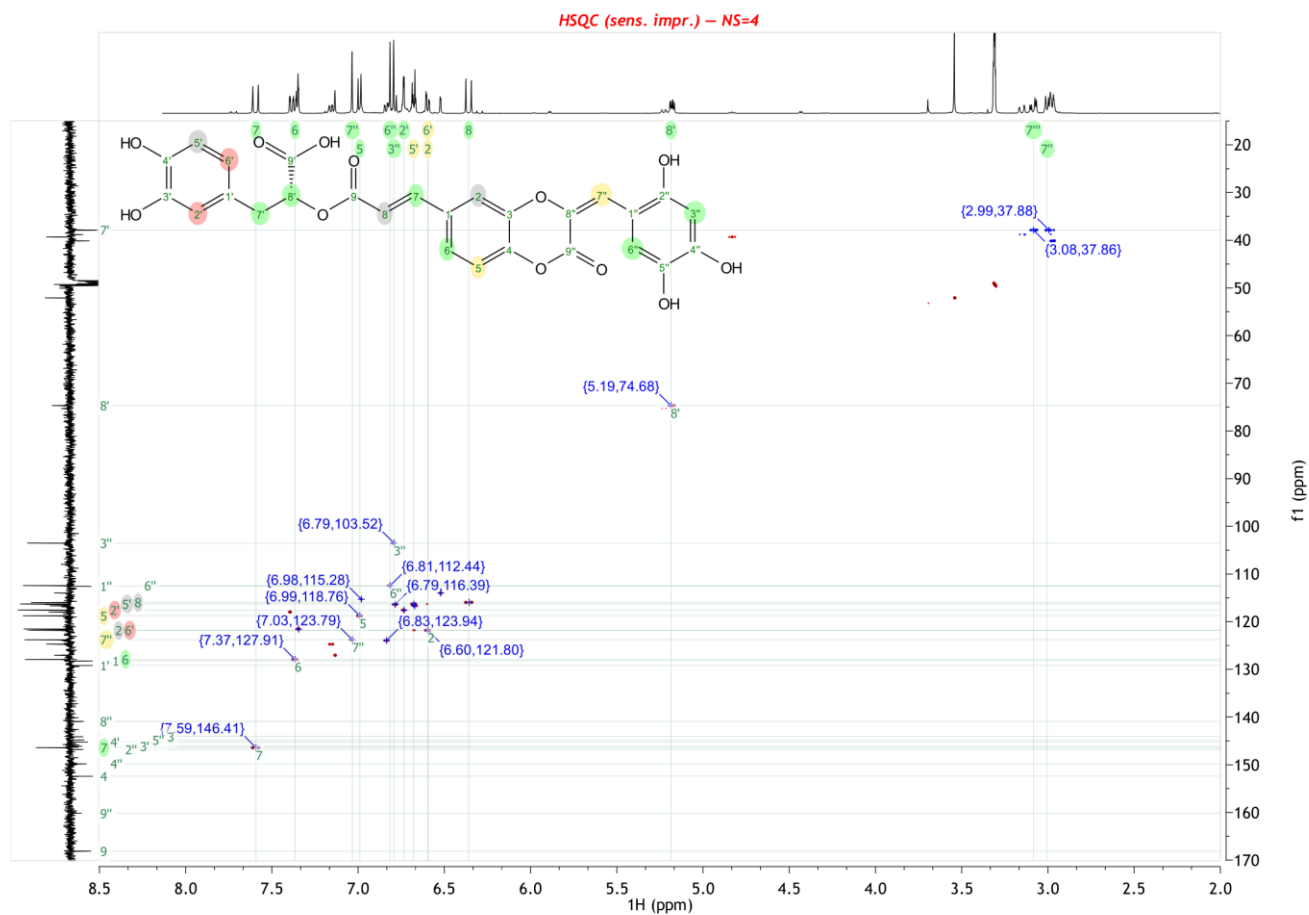

**Figure 93S.**  $^1\text{H}$ - $^{13}\text{C}$  HSQC NMR spectrum of compound 39

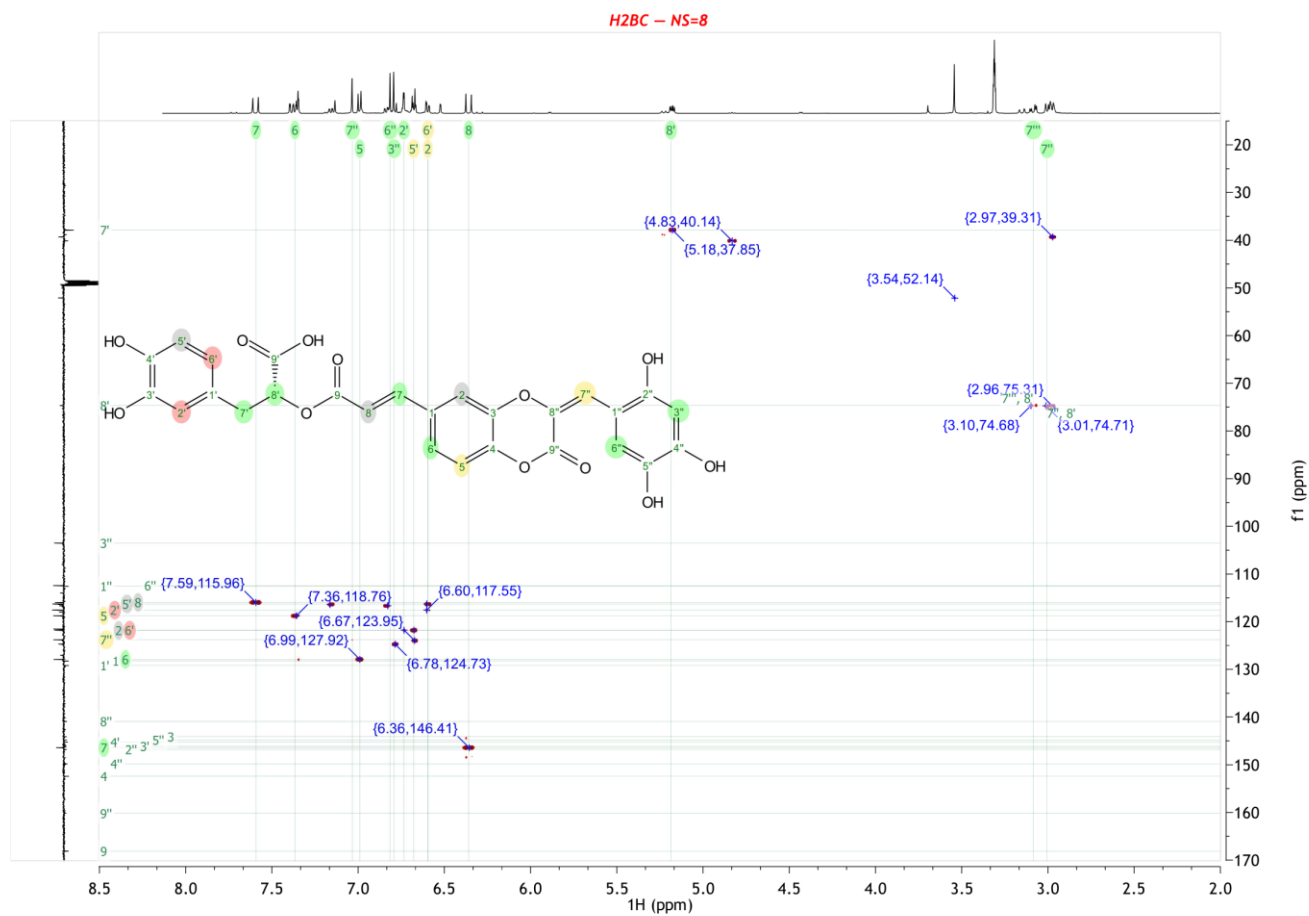

**Figure 94S.**  $^1\text{H}$ - $^{13}\text{C}$  H2BC NMR spectrum of compound 39

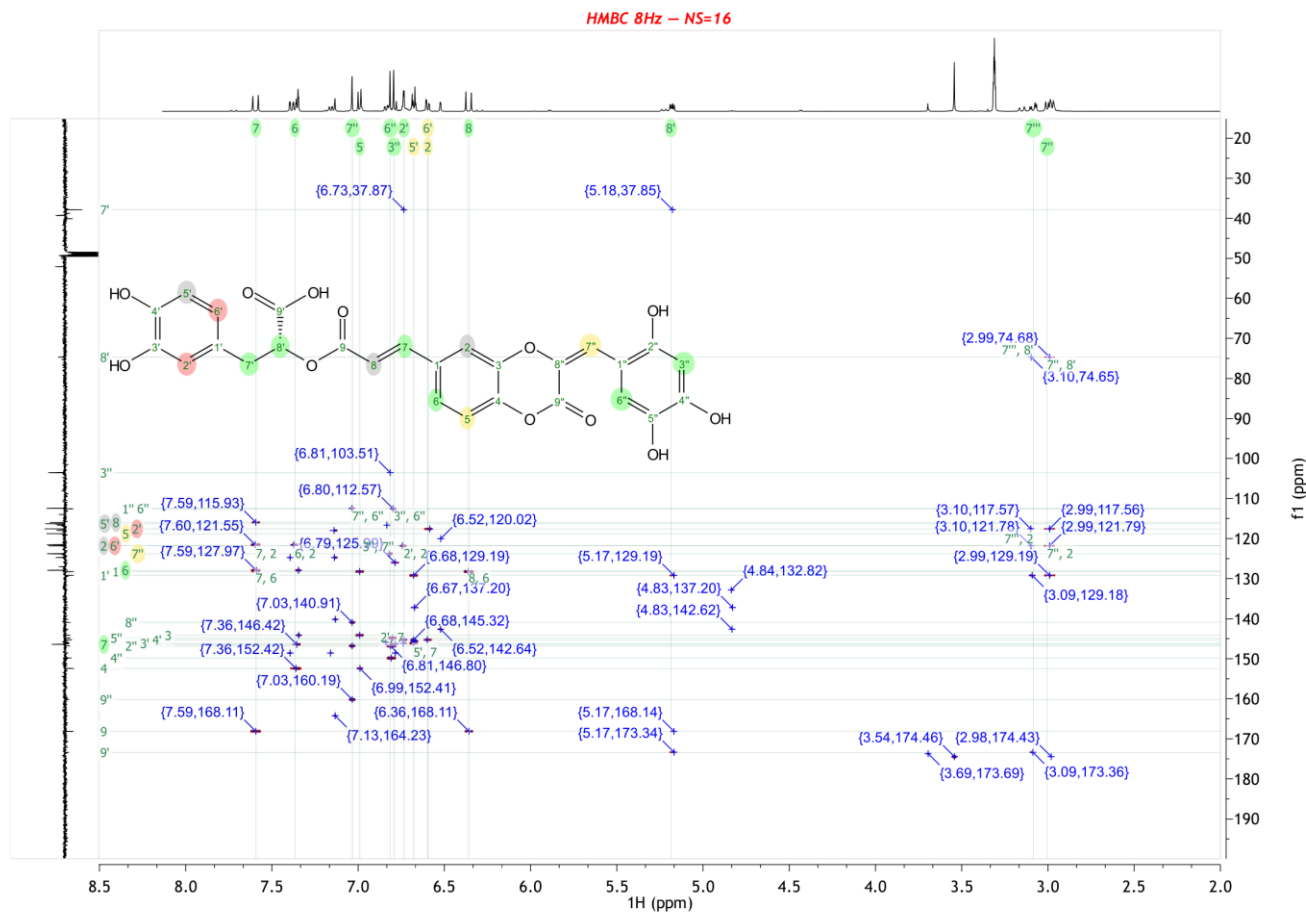

**Figure 95S.**  $^1\text{H}$ - $^{13}\text{C}$  HMBC (8 Hz) NMR spectrum of compound 39

**POAmz493Fr\_VIII\_p55-56\_3\_1**  
 Chemical Formula:  $\text{C}_{26}\text{H}_{22}\text{O}_{10}$   
 Molecular Weight: 494.4520  
**KNOWN**

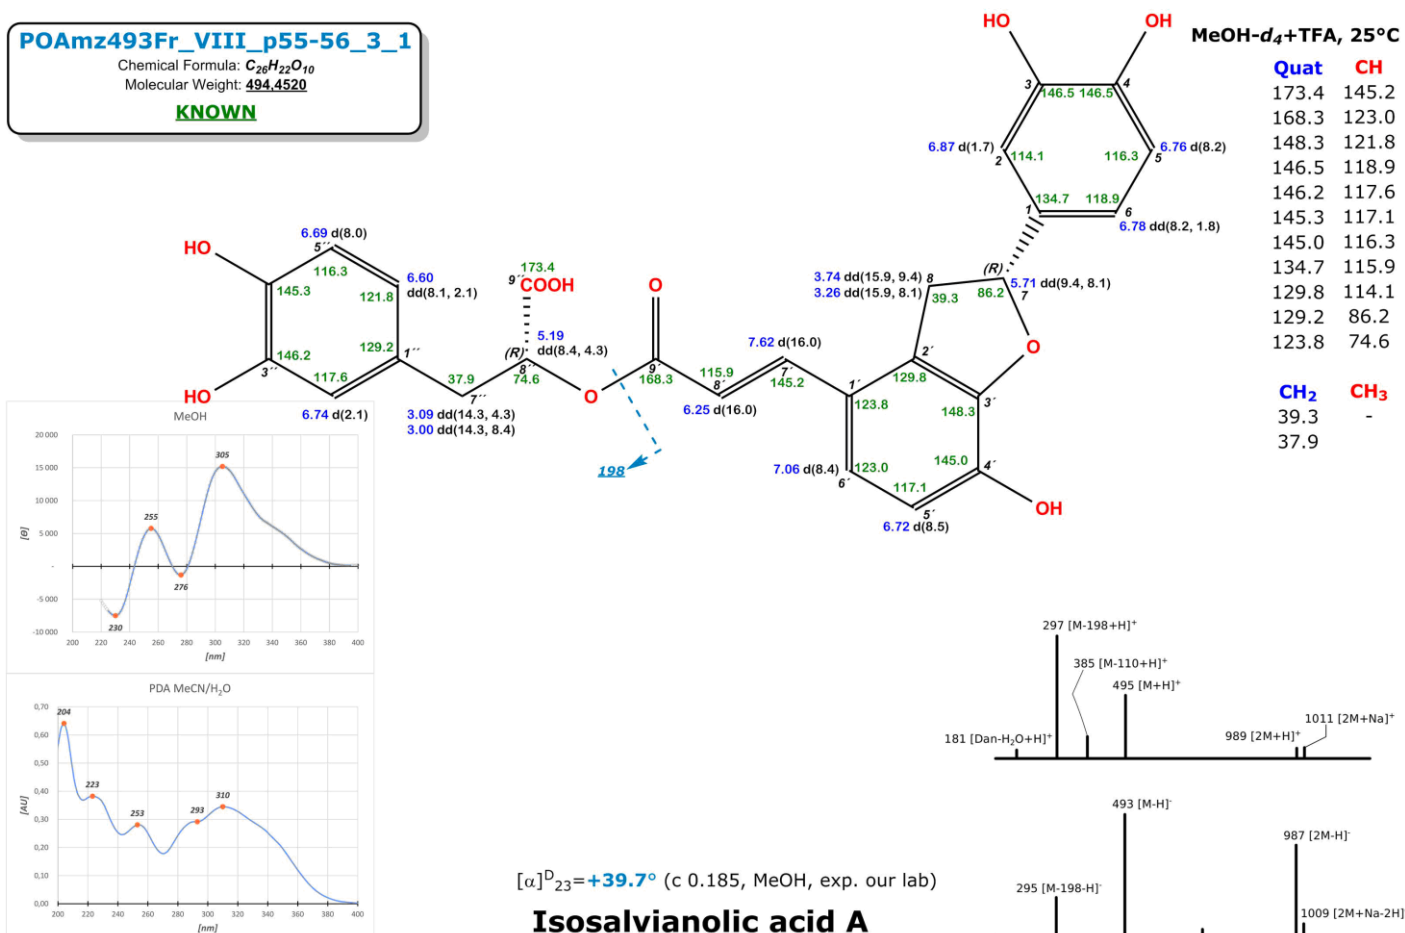

1. Lee, H. J.; Cho, J.-Y.; Moon, J.-H. Chemical conversions of salvianolic acid B by decouction in aqueous solution. *Fitoterapia* 2012, 83, 1196–1204, doi:10.1016/j.fitote.2012.06.015.

**Figure 96S.**  $^1\text{H}$  (500 MHz) and  $^{13}\text{C}$  (125 MHz) NMR data of compound 40 in  $\text{CD}_3\text{OD}$ , 25°C; on-line PDA UV spectrum in  $\text{MeCN}/\text{H}_2\text{O}$ ; ECD spectrum in MeOH

**POAmz493Fr\_VIII\_p55-56\_3\_2**  
 Chemical Formula:  $C_{26}H_{22}O_{10}$   
 Molecular Weight: 494.4520  
**NEW!**

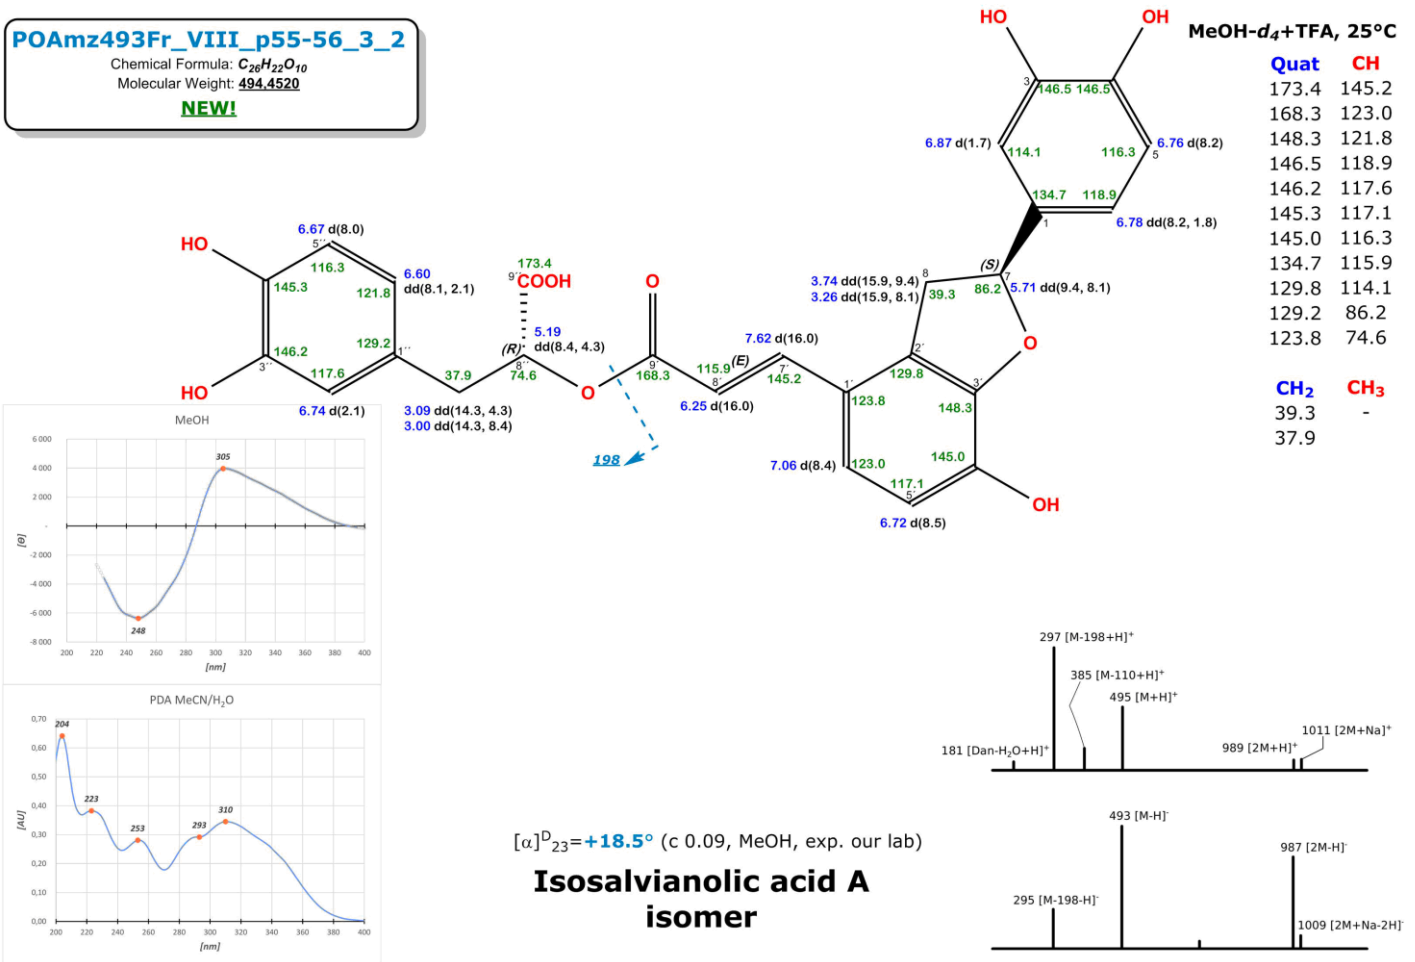

**Figure 97S.**  $^1H$  (500 MHz) and  $^{13}C$  (125 MHz) NMR data of compound 41 in  $CD_3OD$ , 25°C; on-line PDA UV spectrum in MeCN/H<sub>2</sub>O; ECD spectrum in MeOH

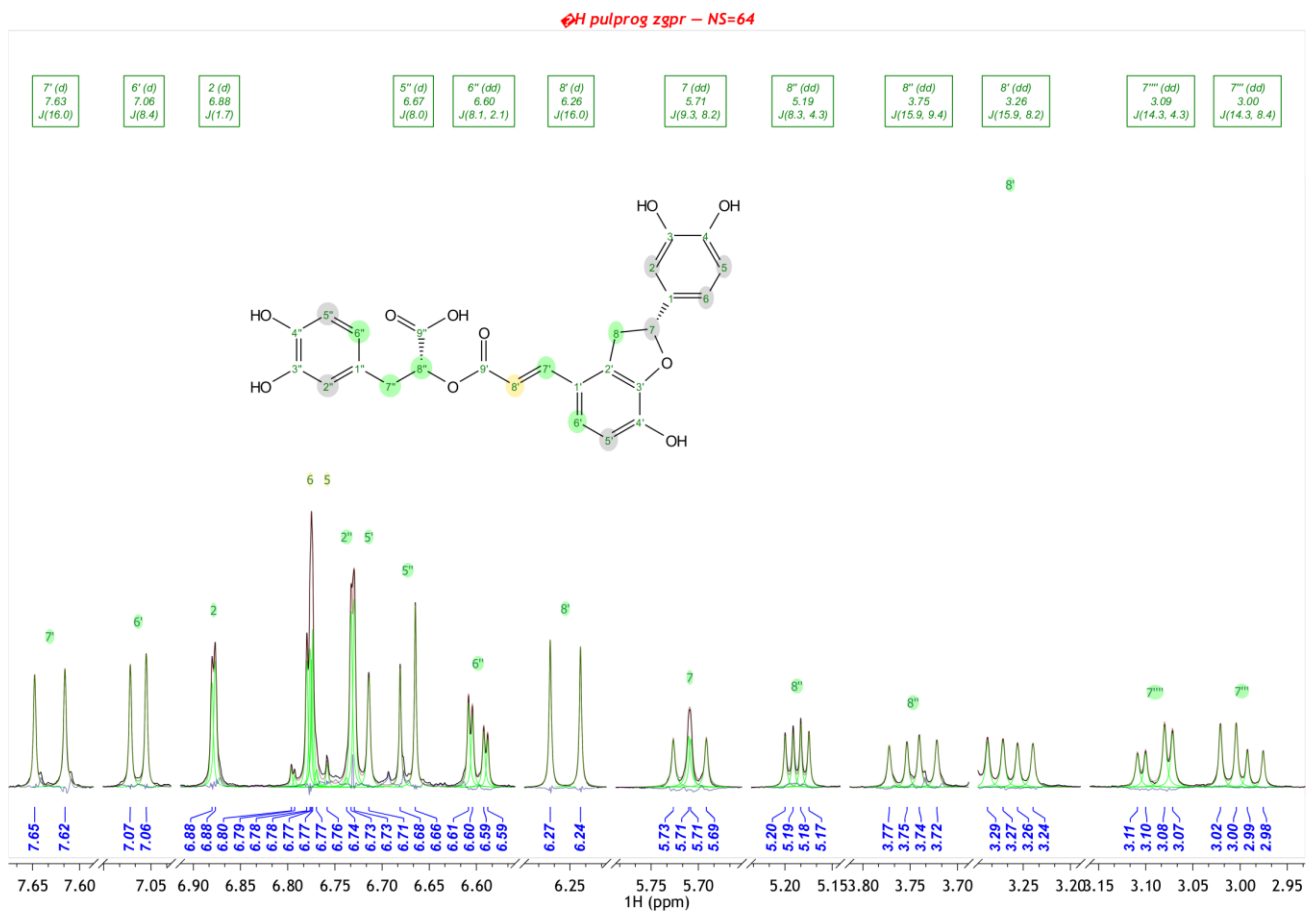

DEPT Q - NS=8192

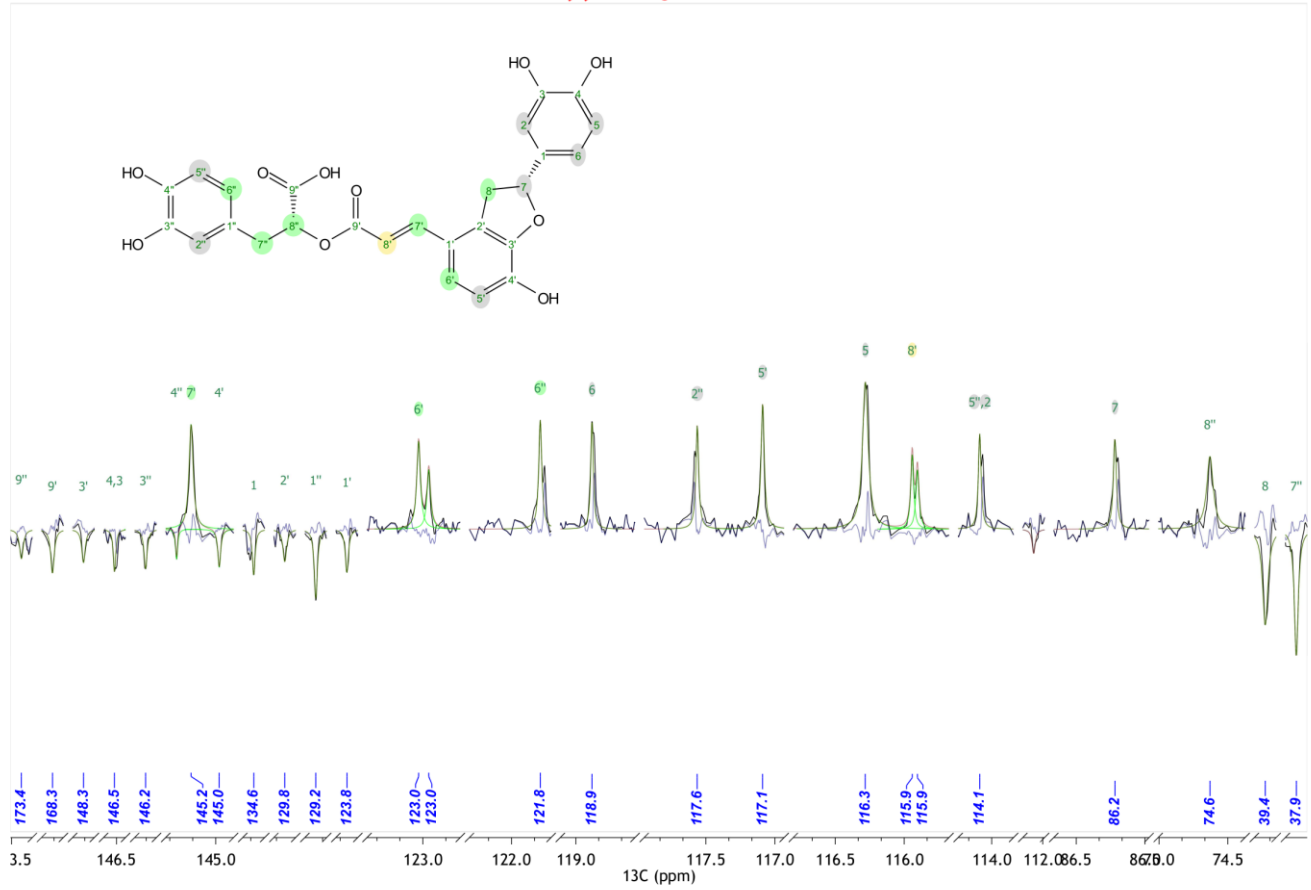

Figure 99S. <sup>13</sup>C DEPTQ NMR spectrum of compound 41

2D COSY-DQF (magn mode) - NS=4

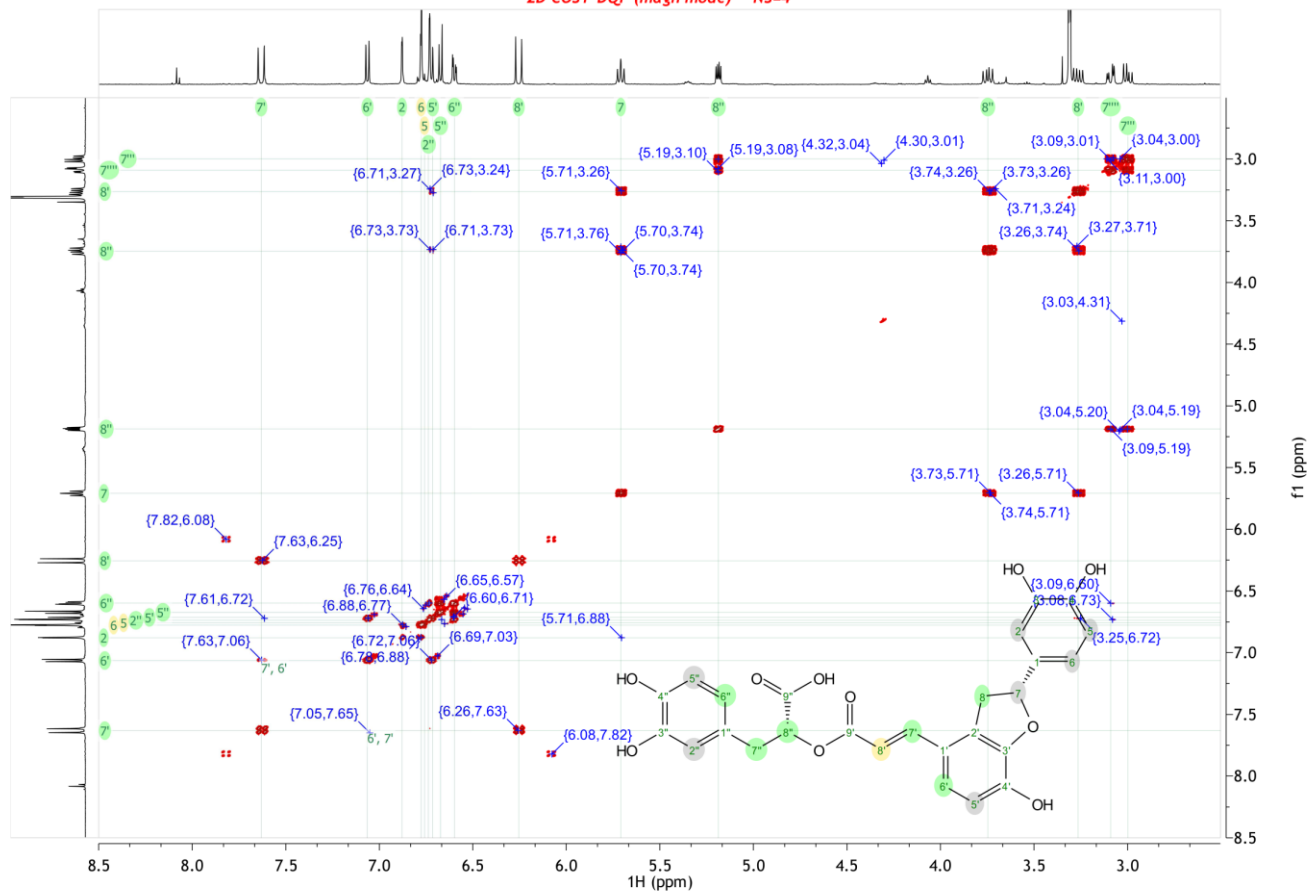

Figure 100S. <sup>1</sup>H-<sup>1</sup>H COSY NMR spectrum of compound 41

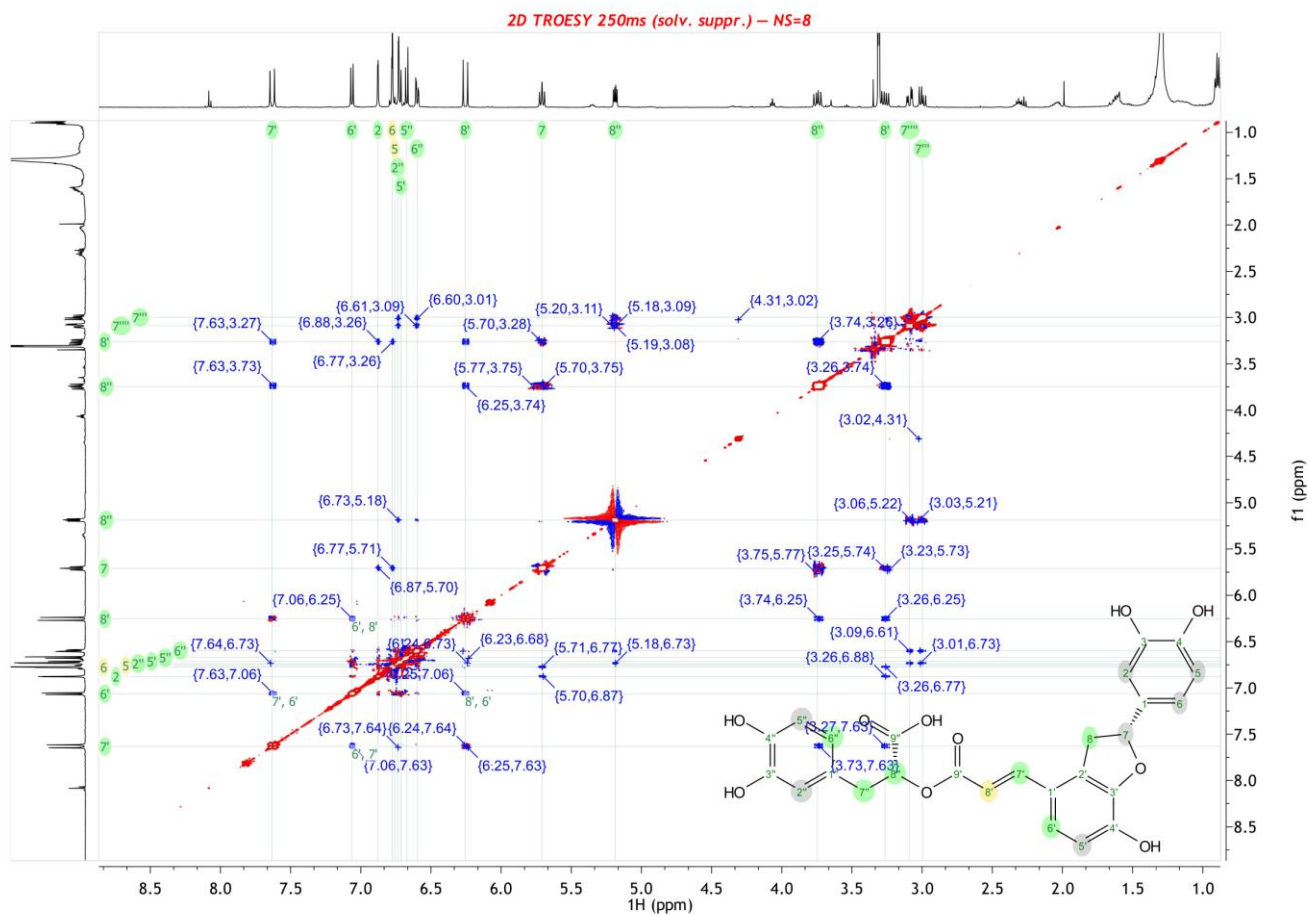

**Figure 101S.**  $^1\text{H}$ - $^1\text{H}$  TROESY (250 ms) NMR spectrum of compound 41

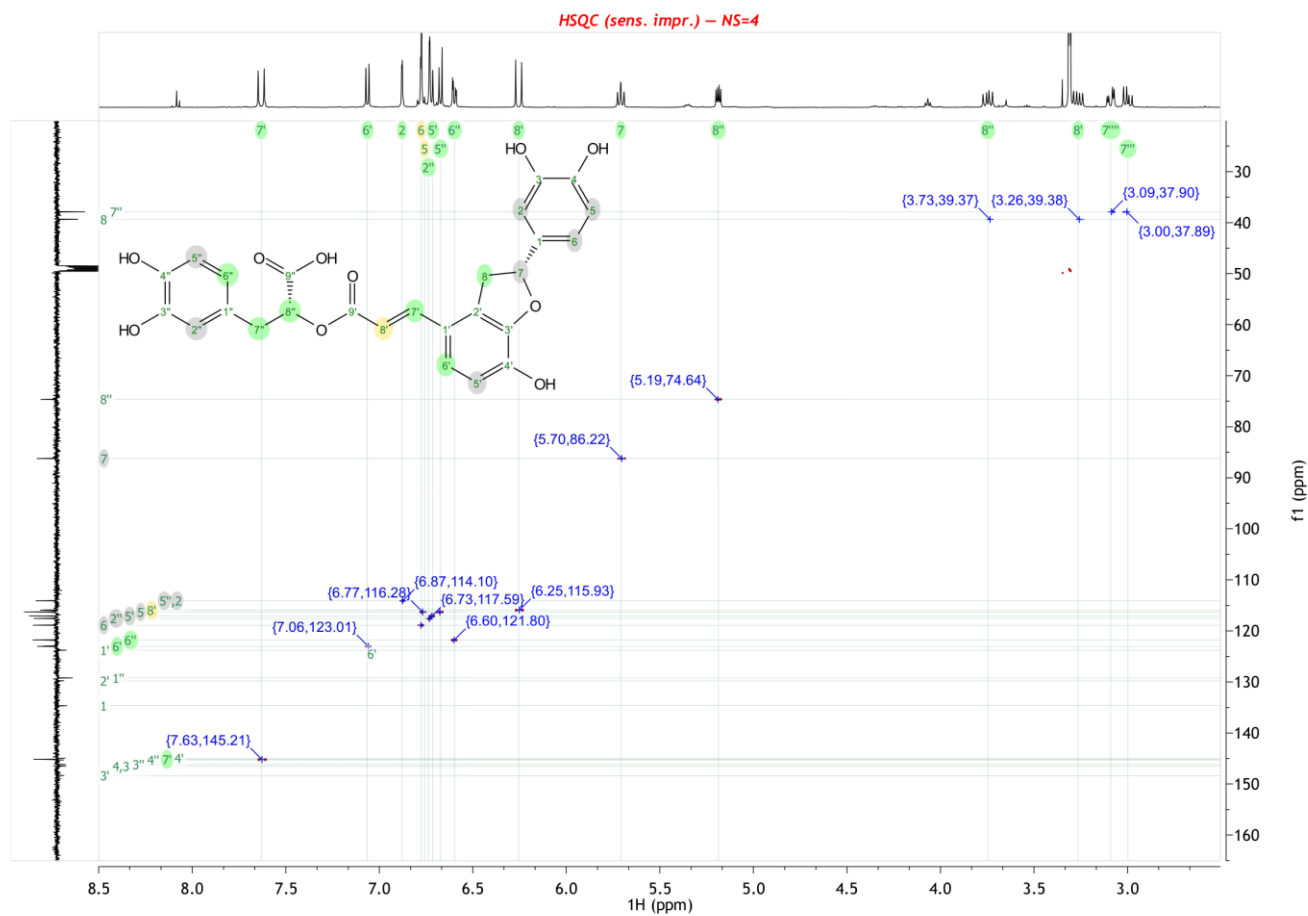

**Figure 102S.**  $^1\text{H}$ - $^{13}\text{C}$  HSQC NMR spectrum of compound 41



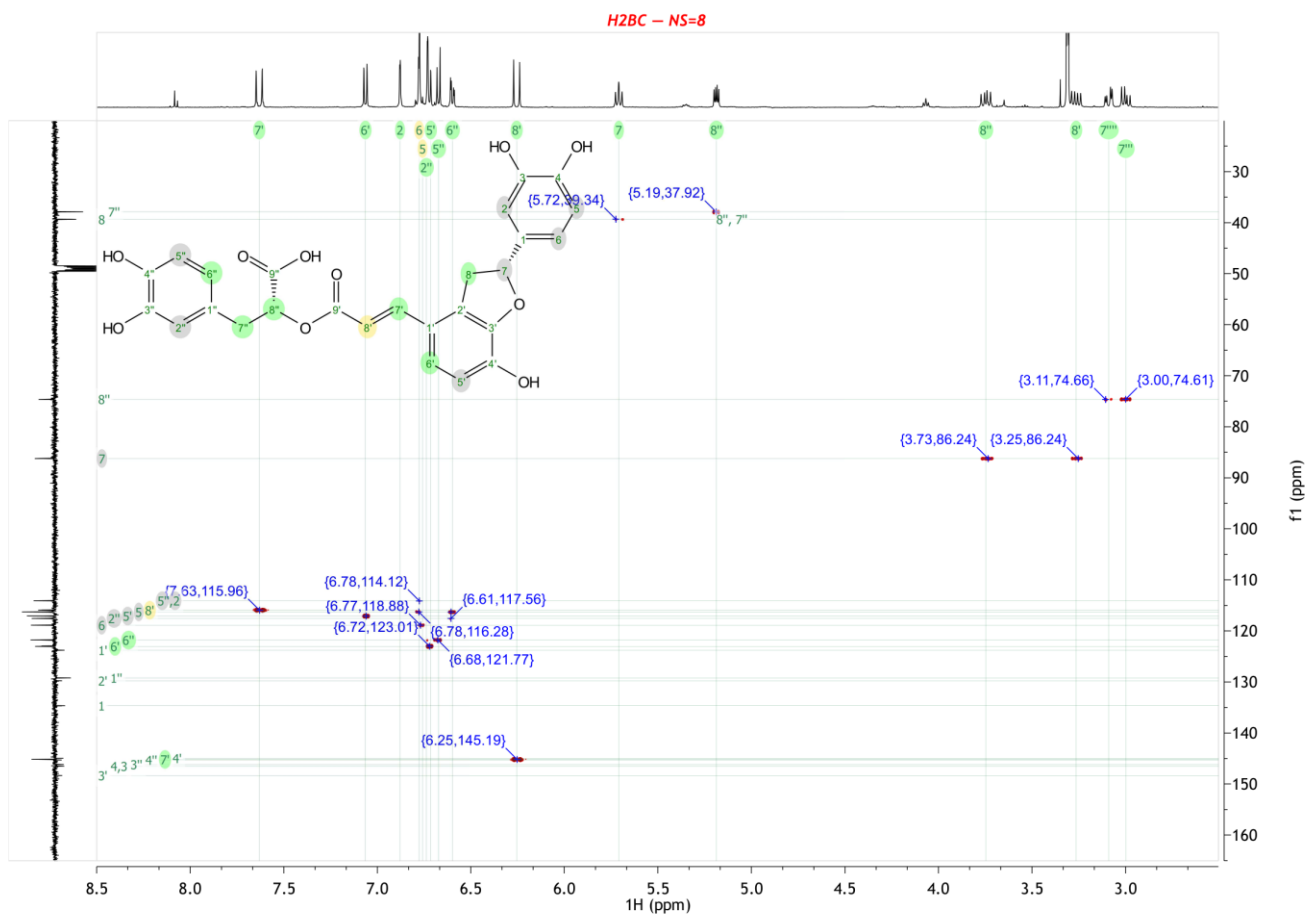

**Figure 103S.**  $^1\text{H}$ - $^{13}\text{C}$  H2BC NMR spectrum of compound 41

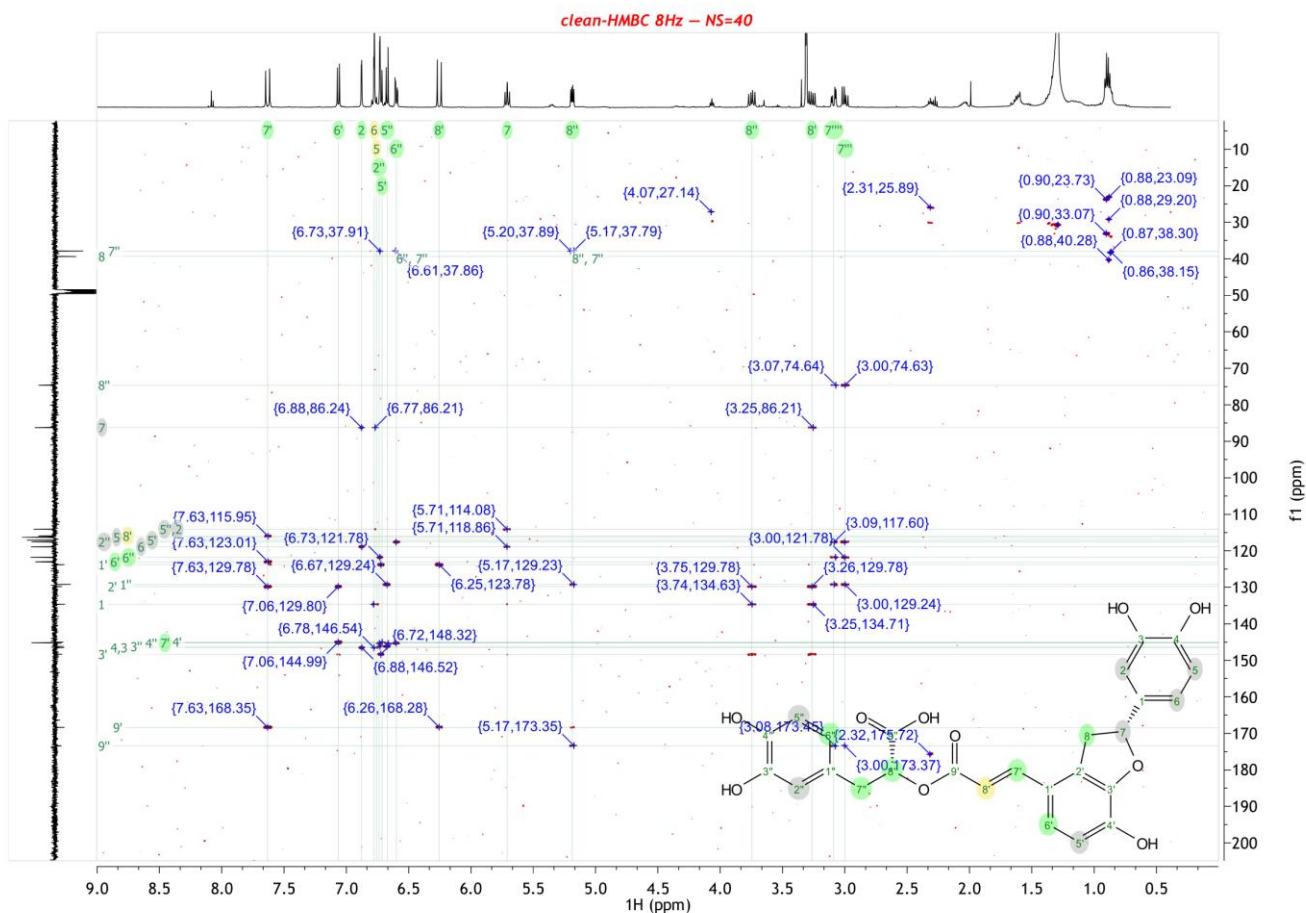

**Figure 104S.**  $^1\text{H}$ - $^{13}\text{C}$  HMBC (8 Hz) NMR spectrum of compound 41

POAmz373Fr\_VIII\_p45-48\_4-5  
 Chemical Formula:  $C_{19}H_{18}O_8$   
 Molecular Weight: 374.3450  
**KNOWN**

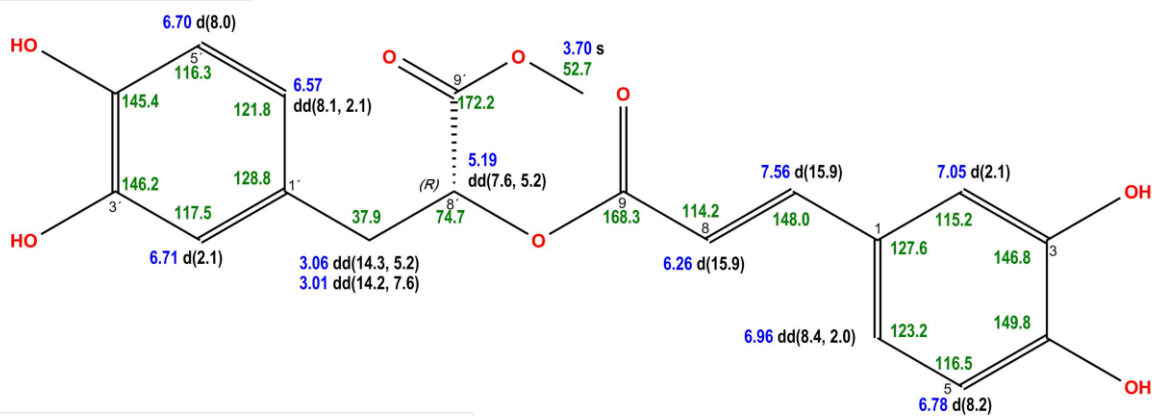

**CH**  
 148.0  
 123.2  
 121.8  
 117.5  
 116.5  
 116.3  
 115.2  
 114.2  
 74.7  
**CH<sub>3</sub>**  
 52.7

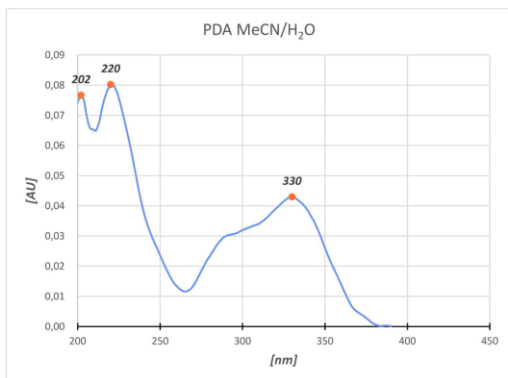

$[\alpha]_{23}^D = +26.6^\circ$  (c 0.26, MeOH, exp. our lab)

**Rosmarinic acid methyl ester**

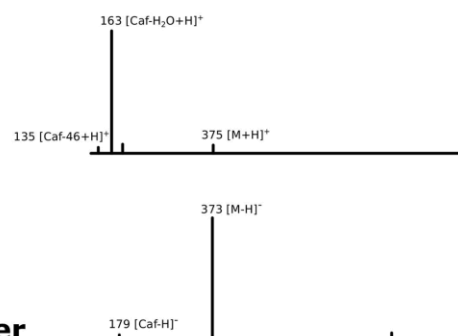

**Figure 105S.**  
 in MeCN/H<sub>2</sub>O

<sup>1</sup>H (500 MHz) and <sup>13</sup>C (125 MHz) NMR data of compound 43 in CD<sub>3</sub>OD, 25°C; on-line PDA UV spectrum

POBmz551Fr\_10  
 Chemical Formula:  $C_{28}H_{32}O_{12}$   
 Molecular Weight: 552.4880  
**KNOWN**

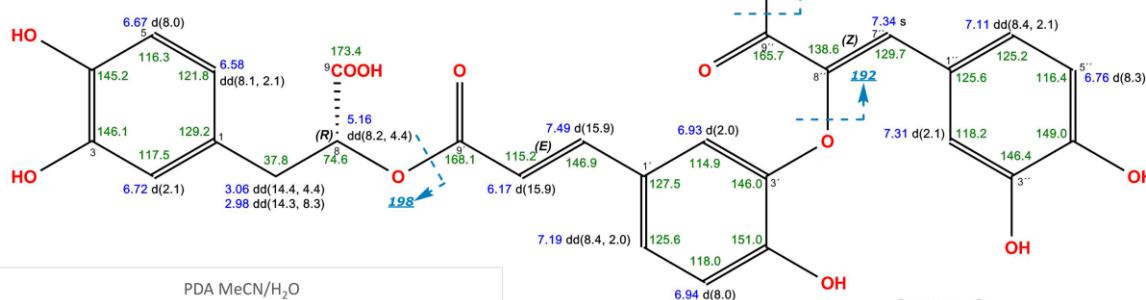

MeOH-*d*<sub>4</sub>, 25°C

**Quat CH**  
 173.4 146.9  
 168.1 129.7  
 165.7 125.6  
 151.0 125.2  
 149.0 121.8  
 146.4 118.2  
 146.1 118.0  
 146.0 117.5  
 145.2 116.4  
 138.6 116.3  
 129.2 115.2  
 127.5 114.9  
 125.6 74.6

**CH<sub>2</sub> CH<sub>3</sub>**  
 37.8 52.8

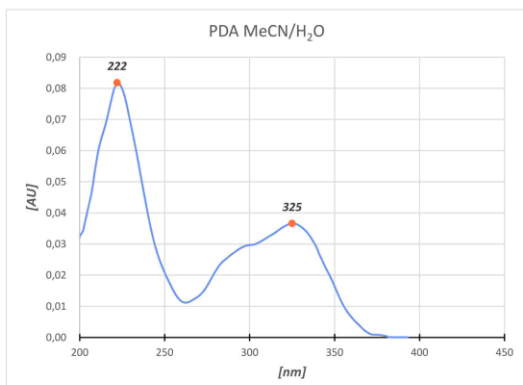

$[\alpha]_{21}^D = +65.5^\circ$  (c 0.55, MeOH)<sup>1</sup>  
 ECD (c 0.033 MeOH) / nm ([Δε]):  
 206 (-3.94), 251 (6.58), 280 (2.70), 297 (6.34),  
 328 (6.67)<sup>1</sup>

**Salvianolic acid H-9''-methyl ester**  
 3'-O-(8''-Z-caffeoyl)rosmarinic acid-9''-methyl ester

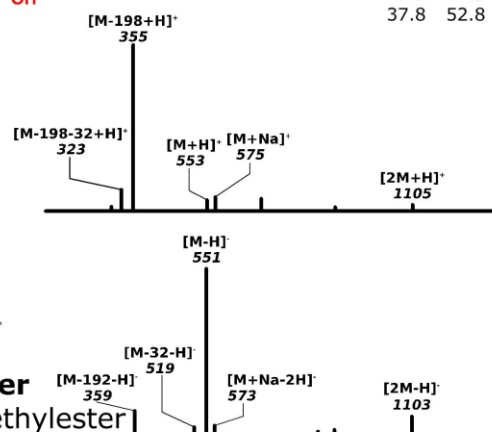

1. Murata, T., Watahiki, M., Tanaka, Y., Miyase, T., Yoshizaki, F., 2010. Hyaluronidase Inhibitors from Takuran, *Lycopus lucidus*. Chem. Pharm. Bull. (Tokyo). 58, 394-397. doi:10.1248/cpb.58.394

**Figure 106S.**  
 in MeCN/H<sub>2</sub>O

<sup>1</sup>H (500 MHz) and <sup>13</sup>C (125 MHz) NMR data of compound 44 in CD<sub>3</sub>OD, 25°C; on-line PDA UV spectrum

Table S1.

| No. | Compound name                                                                                                | Regression equation           | R <sup>2</sup>                      | Calibration range<br>[µg/mL] | LOD<br>[µg/mL] | LOQ<br>[µg/mL] |
|-----|--------------------------------------------------------------------------------------------------------------|-------------------------------|-------------------------------------|------------------------------|----------------|----------------|
| 1   | Danshensu                                                                                                    | $y=-0.0002x^2+0.0194x+0.0045$ | 0.9977                              | 0.2-35                       | 0.1            | 0.4            |
| 2   | Menisdaurin                                                                                                  | $y=-0.0004x^2+0.0374x+0.0067$ | 0.9987                              | 0.2-35                       | 0.1            | 0.4            |
| 3   | 3- <i>O</i> -( <i>E</i> )-caffeoyl-L-threonic acid                                                           | $y=-0.0024x^2+0.0577x+0.0053$ | 0.9995                              | 0.2-12                       | 0.1            | 0.3            |
| 4   | 2- <i>O</i> -( <i>E</i> )-caffeoyl-L-threonic acid                                                           | $y=-0.0004x^2+0.0400x+0.0074$ | 0.9989                              | 0.2-35                       | 0.1            | 0.4            |
| 5   | Lycoperodine-1                                                                                               | $y=-0.0006x^2+0.0387x+0.0114$ | 0.9971                              | 0.2-35                       | 0.1            | 0.4            |
| 6   | Chlorogenic acid                                                                                             | $y=-0.0109x^2+0.2568x+0.0126$ | 0.9998                              | 0.2-12                       | 0.1            | 0.3            |
| 7   | Actinidioionoside                                                                                            | $y=-0.0013x^2+0.0762x+0.0342$ | 0.9937                              | 0.2-12                       | 0.1            | 0.3            |
| 8   | Caffeic acid                                                                                                 | $y=-0.0003x^2+0.0447x+0.0229$ | 0.9982                              | 0.2-60                       | 0.1            | 0.3            |
| 9   | Cryptochlorogenic acid                                                                                       |                               | Calibrated using compound 6 curve.  |                              |                |                |
| 10  | 3'- <i>O</i> -( <i>E</i> )-Feruoyl- $\alpha$ -sorbopyranosyl-(2' $\rightarrow$ 1)- $\alpha$ -glucopyranoside | $y=-0.004x^2+0.0902x+0.0113$  | 0.9988                              | 0.2-12                       | 0.1            | 0.4            |
| 11  | 2- <i>O</i> -( <i>E</i> )-caffeoyl-D-glyceric acid                                                           | $y=-0.0004x^2+0.0477x+0.021$  | 0.9979                              | 0.3-60                       | 0.2            | 0.6            |
| 12  | 4- <i>O</i> -( <i>E</i> )-caffeoyl-L-threonic acid                                                           | $y=-0.005x^2+0.1131x+0.0107$  | 0.9992                              | 0.2-12                       | 0.1            | 0.3            |
| 13  | Neochlorogenic acid                                                                                          | $y=-0.0109x^2+0.2568x+0.0126$ | 0.9998                              | 0.2-12                       | 0.1            | 0.3            |
| 14  | 3- <i>O</i> -( <i>E</i> )-caffeoyl-D-glyceric acid                                                           | $y=-0.0006x^2+0.0717x+0.0267$ | 0.9986                              | 0.2-60                       | 0.1            | 0.3            |
| 15  | 3- <i>O</i> - <i>p</i> -coumaroyl-quinic acid                                                                | $y=-0.0015x^2+0.0967x+0.0358$ | 0.9959                              | 0.2-35                       | 0.1            | 0.4            |
| 16  | 4- <i>O</i> - <i>p</i> -coumaroyl-quinic acid                                                                |                               | Calibrated using compound 15 curve. |                              |                |                |
| 17  | 5- <i>O</i> - <i>p</i> -coumaroyl-quinic acid                                                                |                               | Calibrated using compound 15 curve. |                              |                |                |
| 18  | Globoidnan B                                                                                                 | $y=-0.0003x^2+0.0489x+0.0157$ | 0.9989                              | 0.4-60                       | 0.3            | 0.9            |
| 19  | Rutin                                                                                                        | $y=-0.0012x^2+0.0739x+0.0261$ | 0.9948                              | 0.2-35                       | 0.1            | 0.3            |
| 20  | Nicotiflorin isomer                                                                                          |                               | Calibrated using compound 24 curve. |                              |                |                |
| 21  | Quercetin 3- <i>O</i> - $\beta$ -glucoside                                                                   | $y=-0.0064x^2+0.1414x+0.0189$ | 0.9984                              | 0.2-12                       | 0.1            | 0.3            |
| 22  | Yunnaneic acid E                                                                                             | $y=-0.0001x^2+0.0077x-0.001$  | 0.9984                              | 0.5-60                       | 0.4            | 1.2            |
| 23  | Quercetin 3- <i>O</i> -(6''- <i>O</i> -malonyl)- $\beta$ -glucoside                                          | $y=-0.0004x^2+0.0265x+0.009$  | 0.9944                              | 0.2-35                       | 0.1            | 0.3            |
| 24  | Nicotiflorin                                                                                                 | $y=-0.0018x^2+0.1125x+0.0327$ | 0.9966                              | 0.2-35                       | 0.1            | 0.4            |
| 25  | Astragaln                                                                                                    | $y=-0.002x^2+0.1069x+0.0483$  | 0.9933                              | 0.2-35                       | 0.1            | 0.3            |
| 26  | Shimobashiric acid C                                                                                         | $y=-0.0001x^2+0.0509x+0.0116$ | 0.9993                              | 0.3-60                       | 0.2            | 0.9            |
| 27  | Rosmarinic acid                                                                                              | $y=-0.0001x^2+0.0509x+0.0116$ | 0.9993                              | 0.2-12                       | 0.1            | 0.3            |
| 28  | Kaempferol 3- <i>O</i> -(6''- <i>O</i> -malonyl)- $\beta$ -glucoside                                         | $y=-0.0004x^2+0.0284x+0.0073$ | 0.9968                              | 0.2-35                       | 0.1            | 0.3            |
| 29  | Monardic acid A                                                                                              | $y=-0.0001x^2+0.0017x+0.0032$ | 0.9858                              | 0.5-60                       | 0.5            | 1.5            |
| 30  | Yunnaneic acid E-1                                                                                           |                               | Not measured                        |                              |                |                |
| 31  | Lithospermic acid A                                                                                          | $y=-0.0001x^2+0.0095x+0.0059$ | 0.9997                              | 0.2-60                       | 0.3            | 0.9            |
| 32  | Pulmonarioside A                                                                                             | $y=-0.0003x^2+0.0331x+0.0145$ | 0.9975                              | 0.2-60                       | 0.2            | 0.6            |
| 33  | Salvianolic acid H                                                                                           | $y=-0.0005x^2+0.0683x+0.0135$ | 0.9991                              | 0.2-60                       | 0.1            | 0.3            |
| 34  | Lithospermic acid B                                                                                          |                               | Not measured                        |                              |                |                |
| 35  | Pulmonarioside B                                                                                             | $y=-0.0002x^2+0.0291x+0.0105$ | 0.9982                              | 0.2-60                       | 0.1            | 0.3            |
| 36  | Yunnaneic acid B                                                                                             | $y=-0.0001x^2+0.0024x-0.0017$ | 0.9988                              | 0.2-60                       | 0.1            | 0.3            |
| 37  | Globoidnan A                                                                                                 | $y=-0.0072x^2+0.1572x+0.0108$ | 0.9995                              | 0.2-12                       | 0.1            | 0.3            |
| 38  | Pulmitric acid A                                                                                             | $y=-0.0128x^2+0.2597x+0.0201$ | 0.9994                              | 0.2-12                       | 0.1            | 0.3            |
| 39  | Pulmitric acid B                                                                                             | $y=-0.0026x^2+0.2597x+0.0201$ | 0.9954                              | 0.2-35                       | 0.1            | 0.3            |
| 40  | Isosalvianolic acid A                                                                                        | $y=-0.0117x^2+0.2729x+0.0298$ | 0.9986                              | 0.2-12                       | 0.1            | 0.3            |
| 41  | Isosalvianolic acid A-1                                                                                      |                               | Calibrated using compound 40 curve. |                              |                |                |
| 42  | Isosalvianolic acid A isomer                                                                                 |                               | Calibrated using compound 40 curve. |                              |                |                |
| 43  | Rosmarinic acid methyl ester                                                                                 | $y=-0.0154x^2+0.3333x+0.0683$ | 0.9973                              | 0.2-12                       | 0.1            | 0.3            |
| 44  | Salvianolic acid H-9''-methyl ester                                                                          | $y=-0.001x^2+0.0691x+0.0125$  | 0.9984                              | 0.2-35                       | 0.1            | 0.3            |
| 45  | Lycopic acid C                                                                                               |                               | Not measured                        |                              |                |                |

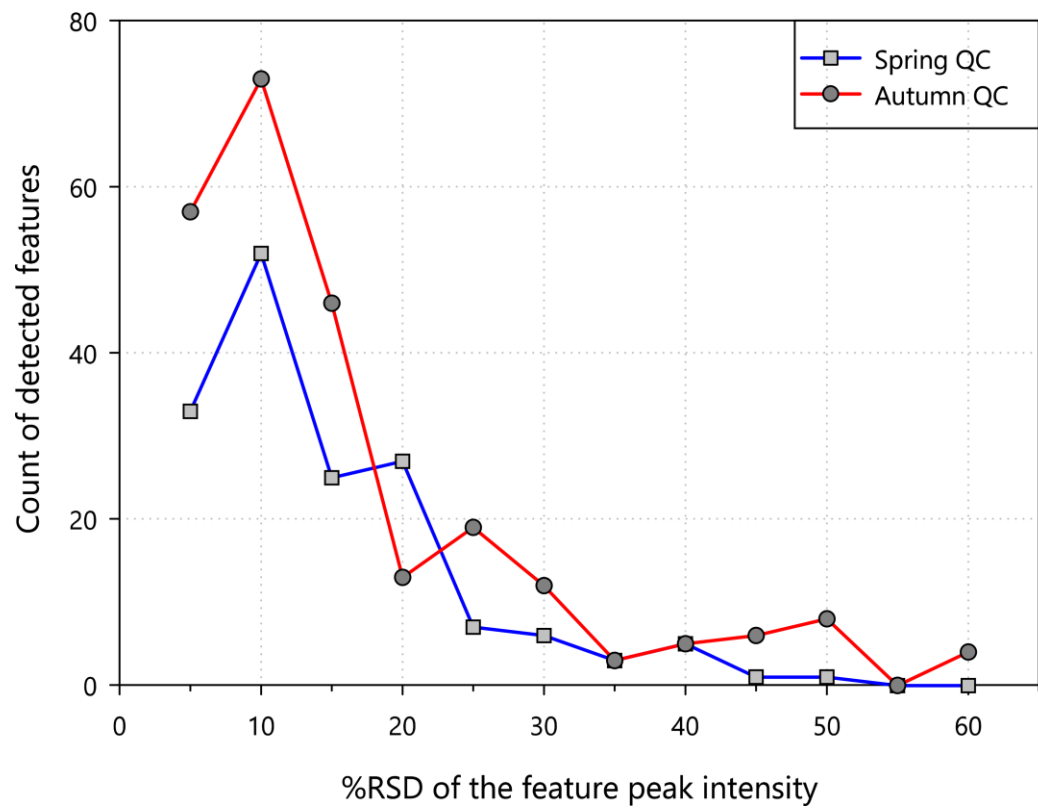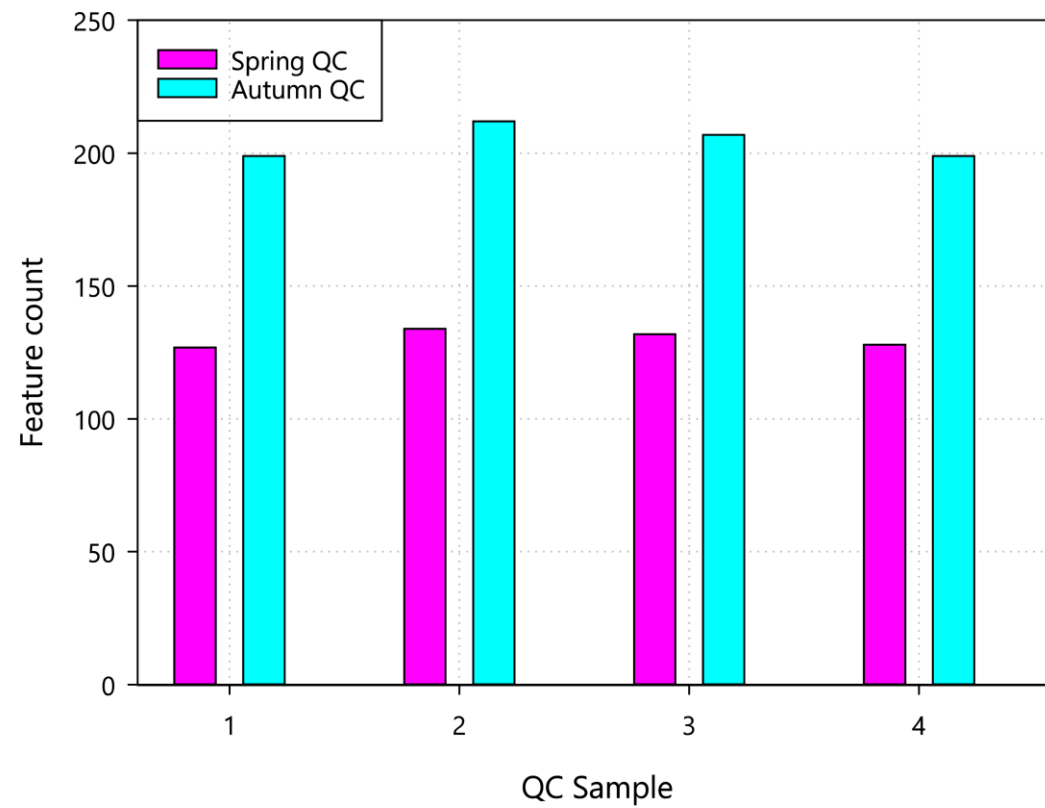

**Figure 107S.** Frequency distribution of the relative standard deviation for the peak intensities and peak numbers in QC samples
